# Supplementary material
Source: PubMed Central journal article supplement (PMC10660252)
Supplement: jamaneurol-e234315-s001.pdf [file jamaneurol-e234315-s001.pdf]

## Supplementary Online Content

Cohen MJ, Meador KJ, Loring DW, et al; Maternal Outcomes and Neurodevelopmental Effects of Antiepileptic Drugs (MONEAD) Investigator Group. Behavioral outcomes and neurodevelopmental disorders among children of women with epilepsy. *JAMA Neurol*. Published online November 20, 2023. doi:10.1001/jamaneurol.2023.4315

**eAppendix 1.** MONEAD Clinical Sites and Investigators

**eAppendix 2.** Additional Details of Outcomes

**eAppendix 3.** Additional Details of Statistical Analyses

**eFigure.** Flowchart of Enrollment and Exclusions

**eTable 1.** Children With Non-Missing Assessments at Ages 2, 3, 4.5

**eTable 2.** ABAS-3 General Adaptive Composite Scores at Age 4.5, Before vs After COVID-19 Shutdown, Completers Population, N = 326

**eTable 3.** Summary of Mother's 3rd Trimester ASM

**eTable 4.** Demographic, Baseline Characteristics, and Risk Factors for Children of WWE vs WWoE, Categorical Variables, Children in Primary Analysis 1, N = 386

**eTable 5.** Demographic, Baseline Characteristics, and Risk Factors for Children of WWE vs WWoE, Continuous Variables, Children in Primary Analysis 1, N = 386

**eTable 6.** Demographic, Baseline Characteristics, and Risk Factors for Children of WWE and Mothers With Max Observed Ratio ASM Concentration in 3rd Trimester, Categorical Variables, Children in Primary Analysis 2, N = 271

**eTable 7.** Demographic, Baseline Characteristics, and Risk Factors for Children of WWE and Mothers With Max Observed Ratio ASM Concentration in 3rd Trimester, Continuous Variables, Children in Primary Analysis 2, N = 271

**eTable 8.** Association Between Age 4.5 ABAS-3 General Adaptive Composite Score and Maximum Observed Ratio ASM Concentration<sup>a</sup> During 3rd Trimester by ASM Category, Children of WWE With 3rd Trimester Blood Levels, Completers Population

**eTable 9.** Association Between Age 4.5 ABAS-3 General Adaptive Composite Score and Maximum Observed Ratio ASM Concentration<sup>a</sup> During 3rd Trimester by ASM Group, Children of WWE With 3rd Trimester Blood Levels, Completers Population

**eTable 10.** Association Between Age 4.5 ABAS-3 General Adaptive Composite Score and Mother's Maximum Ratio DDD During 3rd Trimester, Children of WWE on ASM in 3rd Trimester, Completers Population

**eTable 11.** Association Between Age 4.5 ABAS-3 General Adaptive Composite Score and Mother's Maximum Ratio DDD During 3rd Trimester by ASM Category, Children of WWE on ASM in 3rd Trimester, Completers Population

**eTable 12.** Association Between Age 4.5 ABAS-3 General Adaptive Composite Score and Mother's Maximum Ratio DDD During 3rd Trimester by ASM Group, Children of WWE on ASM in 3rd Trimester, Completers Population

**eTable 13.** Age 4.5 ABAS-3 General Adaptive Composite Score by Breastfeeding Status, Folate Use, and Folate Dose, Children of WWE and WWoE, Completers Population

**eTable 14.** Association Between Age 4.5 ABAS-3 General Adaptive Composite Score and Mother's Sleep Quality (PSQI), Children of WWE and WWoE, Completers Population

**eTable 15.** Age 4.5 ABAS-3 General Adaptive Composite Score by Breastfeeding Status, Folate Use, and Folate Dose, Children of WWE on ASM in 3rd Trimester, Completers Population

**eTable 16.** Association Between Age 4.5 ABAS-3 General Adaptive Composite Score and Maternal Sleep Quality (PSQI), Children of WWE on ASM in 3rd Trimester, Completers Population

**eTable 17.** Association Between Age 4.5 ABAS-3 General Adaptive Composite Score and Maternal Psychiatric Risk Factors (BDI, BAI, PSS), Children of WWE and WWoE, Completers Population

**eTable 18.** Association Between Age 4.5 ABAS-3 General Adaptive Composite Score and Mother Psychiatric Risk Factors (BDI, BAI, PSS), Children of WWE on ASM in 3rd Trimester, Completers Population

**eTable 19.** Continuous Behavior Scores by Mother's Study Group and Child's Age, Children of WWE vs WWoE, Completers Population

**eTable 20.** Association Between Continuous Behavior Scores and Maximum Observed Ratio ASM Concentration in 3rd Trimester by Child's Age, Children of WWE With 3rd Trimester Blood Levels, Completers Population

**eTable 21.** Association Between Continuous Behavior Scores and Maximum Ratio DDD in 3rd Trimester by Child's Age, Children of WWE on ASM in 3rd Trimester, Completers Population

**eTable 22.** Association Between Continuous Behavior Scores and Maximum Observed Ratio ASM Concentration in 3rd Trimester by ASM Category and Child's Age, Children of WWE with 3rd Trimester Blood Levels, Completers Population

**eTable 23.** Association Between Continuous Behavior Scores and Maximum Ratio DDD in 3rd Trimester by ASM Category and Child's Age, Children of WWE With 3rd Trimester Blood Levels, Completers Population

**eTable 24.** Categorical Behavior Scores by Mother's Study Group and Child's Age, Children of WWE vs WWoE, Completers Population

**eTable 25.** Categorical Behavior Scores by Mother's ASM Category, Children of WWE With 3rd Trimester Blood Levels, Completers Population

**eTable 26.** Demographic, Baseline Characteristics, and Risk Factors for Children Included vs Excluded From Primary Analysis 1, Categorical Variables, Children in Primary Analysis 1, N = 451

**eTable 27.** Demographic, Baseline Characteristics, and Risk Factors for Children Included vs Excluded From Primary Analysis 1, Continuous Variables, Children in Primary Analysis 1, N = 451

**eTable 28.** Outcomes for Children Included vs Excluded From Primary Analysis 1, All Children, N = 451

**eTable 29.** Demographic, Baseline Characteristics, and Risk Factors for Children Included vs Excluded From Primary Analysis 2, Categorical Variables, Children of WWE on ASM in 3rd Trimester, N = 329

**eTable 30.** Demographic, Baseline Characteristics, and Risk Factors for Children Included vs Excluded From Primary Analysis 2, Continuous Variables, Children of WWE on ASM in 3rd Trimester, N = 329

**eTable 31.** Outcomes for Children Included vs Excluded From Primary Analysis 2, Children of WWE on ASM in 3rd Trimester, N = 329

**eTable 32.** Age 4.5 ABAS-3 General Adaptive Composite Score by Mother's Study Group – Sensitivity Analysis, Children of WWE and WWoE

**eTable 33.** Association Between Age 4.5 ABAS-3 General Adaptive Composite Score and Maximum Observed Ratio ASM Concentration During 3rd Trimester – Sensitivity Analysis, Children of WWE on ASM During the 3rd Trimester

**eTable 34.** Summary of Age 4.5 ABAS-3 General Adaptive Composite Score by Mother's Study Group and Pregnancy ASM Status, Children of WWE and WWoE, Completers Population, N = 326

**eTable 35.** Age 4.5 ABAS-3 General Adaptive Composite Score by Mother's Study Group - Sensitivity Analysis Excluding Children of WWE Not on ASM During Pregnancy, Children of WWE on ASM During Pregnancy and WWoE, Completers Population, N = 313

This supplementary material has been provided by the authors to give readers additional information about their work.

## **eAppendix 1. MONEAD Clinical Sites and Investigators**

### **MONEAD Clinical Sites**

Augusta University  
Columbia University  
Emory University  
Geisinger Clinic  
Harvard University (Brigham & Women's Hospital)  
Henry Ford Hospital (Wayne State University)  
Johns Hopkins University  
Minnesota Epilepsy Group  
New York University  
Northwell Health  
Northwestern University  
Stanford University  
University of Alabama at Birmingham  
University of Arizona  
University of Cincinnati  
University of Miami  
University of Pittsburgh  
University of Southern California  
University of Washington  
Wake Forest University Health Sciences

### **MONEAD Investigator Group**

Executive Committee: Kimford J. Meador, MD (Stanford University, Multiple PI and Executive Committee Director); Page B. Pennell, MD (Harvard University, Brigham & Women's Hospital, Multiple PI and Co-Director of Semiology Core); Ryan May, PhD (previously with The Emmes Company, former Multiple PI and Director of Data & Statistical Center); Abigail G. Matthews, PhD (The Emmes Company, Multiple PI and Director of Data & Statistical Center); Angela Birnbaum, PhD (University of Minnesota, Director of Pharmacokinetics Core); Morris J. Cohen, EdD (Pediatric Neuropsychology International, Co-Director of Neuropsychology Core); Maurice Druzin, MD (Stanford University, Co-Director of OB Core); Richard Finnell, PhD (Baylor College of Medicine, Consultant on Teratogenicity); Jacqueline French, MD (New York University, Co-Director, Semiology Core); Gregory Holmes, MD (University of Vermont, Consultant); David W. Loring, PhD (Emory University, Co-Director, Neuropsychology Core and Chair, Publications Committee); Frederick T. McElrath, MD (Harvard University, Brigham & Women's, Co-Director of OB Core); Lorene Nelson, PhD (Stanford University, Consultant); Zachary Stowe, MD (University of Wisconsin, Director of Psychiatric Core); Linda Van Marter, MD (Harvard University, Brigham & Women's, Director of Neonatal Core); Peter Wells, PharmD (University of Toronto, Consultant); Mark Yerby, MD (Oregon Health Sciences University, Consultant); Eugene Moore, BS (Emory University, Multisite Research Project Manager).

Data & Statistical Center: (The Emmes Company): Abigail G. Matthews, PhD (Multiple PI and Director of Data & Statistical Center); Dominic Ippolito, MS (Project Manager), Carrie Brown, MS (Statistician), Chelsea Robalino, MStat (Statistician), Lisa Davis, BA (Administrative Coordinator), Nilay Shah, MD (Medical Monitor), Brenda Leung, BS (Programmer Analyst), Mark Friedman, MS (Clinical Systems Analyst), Traci Sheer, BA (Data Manager/Protocol Monitor), Yue Wang, MS (SAS Programmer).

MONEAD Site Investigators:

Augusta University: Suzanne Strickland, MD (site PI); Erin Latif, MD (OB Co-Investigator); Yong Park, MD (OB Co-Investigator); Delmaris Acosta-Cotte, MA (Site Neuropsychologist); Patty Ray, PhD (research assistant);

Columbia University: Alison Pack, MD (site PI); Kirsten Cleary, MD (OB Co-Investigator); Joyce Echo, PhD (Site Neuropsychologist); Annette Zygmunt, PhD (Site Neuropsychologist); Camilla Casadei, BA (research assistant);

Emory University: Evan Gedzelman, MD (site PI); Mary Dolan, MD (OB Co-Investigator); Kim Ono, PhD (Site Neuropsychologist); Donald Bearden, PhD (Site Neuropsychologist); Christine Ghilian, PhD (Site Neuropsychologist); Diane Teagarden, MSN (Co-Investigator); Melanee Newman, RN (research assistant);

Geisinger Clinic: Cora Taylor, PhD (Site PI & Neuropsychologist); Paul McCabe, MD (former site PI); Michael Paglia, MD (OB Co-Investigator); Rosemarie Delucca, RN (research assistant); Kristina Blessing MSW (research assistant);

Harvard University and affiliated hospitals: Paula Emanuela Voinescu, MD PhD (Brigham & Women's Hospital, site PI); Page Pennell, MD (MONEAD Multi-PI & former site PI); Frederick T. McElrath, MD (Brigham & Women's Hospital, Co-Director OB Core); Linda Van Marter, MD (Brigham & Women's Hospital, Director of Neonatal Core); Katrina Boyer, PhD (Boston Children's Hospital, Site Neuropsychologist); Ellen Hanson, PhD (Boston Children's Hospital, Site Neuropsychologist); Amy Young, PsyD (Boston Children's Hospital, Site Neuropsychologist); Paige Hickey, BS (Boston Children's Hospital, Site Psychometrist); Jolie Strauss, MA (Boston Children's Hospital, Site Psychometrist); Hayley Madeiros, BS (Boston Children's Hospital, Site Psychometrist); Li Chen, BA (Brigham & Women's Hospital, research assistant); Stephanie Allien, PAC (Brigham & Women's Hospital, research physician's assistant); Yvonne Sheldon, RN (Brigham & Women's Hospital, Neonatal research nurse); Taylor Weinau, BS (Brigham & Women's Hospital, OB research assistant).

Henry Ford Hospital (Wayne State University): Gregory L. Barkley, MD (site PI); Marianna Spanaki-Varelas, MD PhD (OB Co-Investigator); Andrea Thomas, MS (Site Neuropsychologist); Jules Constantinou, MD (Co-Investigator); Nazin Mahmood, MD (Co-Investigator); Vibhangini Wasade, MD (Co-Investigator); Shailaja Gaddam, MD (Co-Investigator); Andrew Zillgitt, DO (Co-Investigator); Taimur Anwar, MD (OB Co-Investigator); Carla Sandles, CCRP (research assistant); Theresa Holmes, BA (research assistant);

Johns Hopkins University: Emily Johnson, MD (site PI); Gregory Krauss, MD (prior site PI) Shari Lawson, MD (OB Co-Investigator); Alison Pritchard, PhD (Site Neuropsychologist); Matthew Ryan, MS (Site Neuropsychologist); Pam Coe, MS (research assistant);

Minnesota Epilepsy Group: Julie Hanna, MD (site PI); Patricia Penovich, MD (former site PI); Katie Reger, PhD (Site Neuropsychologist); Jenny Pohlman, MBS (research assistant); Alisha Olson, RN (research assistant);

New York University: Jacqueline French, MD (site PI); William Schweizer, MD (OB Co-Investigator); Chris Morrison, PhD (Site Neuropsychologist); William MacAllister, PhD (Site Neuropsychologist); Tobi Clements, BA (research assistant);

Northwell Health: Sean Hwang, MD (site PI); Hima Bindu Tam, MD (OB Co-Investigator); Yael Cukier, PhD (Site Neuropsychologist); Erica Meltzer, MD (Site Neuropsychologist); Jacqueline Helcer, PhD (Site Neuropsychologist); Connie Lau, MS (research assistant);

Northwestern University: Elizabeth Gerard, MD (site PI); William Grobman, MD (OB Co-Investigator); Joseph Coda, PsyD (Site Neuropsychologist); Emily Miller, MD (OB Co-Investigator); Irena Bellinski, RN (research assistant); Elizabeth Bachman, MPH (research assistant);

Stanford University: Kimford Meador, MD (Multi-PI & site PI); Maurice Druzin, MD (Co-director OB Core); Casey Krueger, PhD (Site Neuropsychologist); Jordan Seliger, MA (research assistant);

University of Alabama at Birmingham: Jennifer DeWolfe, DO (site PI); John Owen, MD (OB Co-Investigator); Matthew Thompson, PsyD (Site Neuropsychologist); Cheryl Hall, LPN (research assistant);

University of Arizona: David Labiner, MD (site PI); James Maciulla, MD (OB Co-Investigator); Jennifer Moon, PsyD (Site Neuropsychologist); Kayla Darris, BA (research assistant);

University of Cincinnati: Jennifer Cavitt, MD (site PI); Michael Privitera, MD (Co-Investigator); Kellie Flood-Schaffer, MD (OB, Co-Investigator); George Jewell, PhD (Site Neuropsychologist); Lucy Mendoza, CCRP (research assistant);

University of Miami: Naymee Velez-Ruiz, MD (site PI); Yasin Salih, MD (OB Co-Investigator); Christin Bermudez, PhD (Site Neuropsychologist); Michelle Miranda, PhD (Site Neuropsychologist); Enrique Serrano, MD (Co-Investigator); Pedro Figueredo, MD (research assistant);

University of Pittsburgh: Anto Bagic, MD (site PI); Page Pennell, MD (MONEAD Multi-PI); Alexandra Popescu Urban, MD (Co-Investigator); Satya Gedela, MD (Co-Investigator); Christina Patterson, MD (Co-Investigator); Arundhathi Jeyabalan, MD (OB Co-Investigator); Krestin Radonovich, PhD (Site Neuropsychologist); Melissa Sutcliffe, PhD (Site Neuropsychologist); Susan Beers, PhD (Site Neuropsychologist); Carrie Wiles, MS (Site Neuropsychologist); Sandra Alhaj, BS (research assistant);

University of Southern California: Laura Kalayjian, MD (site PI); Alice Stek, MD (OB Co-Investigator); Sonia Perez, PhD (Site Neuropsychologist); Rachel Sierra, RC (research assistant);

University of Washington: Jeffrey J. Tsai, MD (site PI); John W. Miller, MD (former site PI); Jennie Mao, MD (OB Co-Investigator); Vaishali Phatak, PhD (Site Neuropsychologist); Michelle Kim, PhD (Site Neuropsychologist); Andrea Cheng-Hakimian, MD (Co-Investigator); Gina DeNoble, MS (research assistant);

Wake Forest University Health Sciences: Maria Sam, MD (Wake Forest University Health Sciences, site PI); Lamar Parker, MD (Wake Forest University Health Sciences, OB Co-Investigator); Melissa Morris, MA (Wake Forest University Health Sciences, Site Neuropsychologist); Jessica Dimos, BS (Wake Forest University Health Sciences, research assistant);

Multisite: Danielle Miller, MA (Project Traveling Neuropsychologist).

## **eAppendix 2.** Additional Details of Outcomes

Expressive Language Index (ELI) was calculated as the average of the following two assessments:

- Scaled Naming Vocabulary subtest from DAS-2<sup>1</sup> (re-scaled to have Mean = 100 and Standard Deviation = 15)
- Expressive Communication subscale from PLS-5<sup>2</sup>

If missing score for any subscale, then ELI was set to missing.

Receptive Language Index (RLI) was calculated as the average of the following three assessments:

- Scaled Verbal Comprehension subtest from DAS-2<sup>1</sup> (re-scaled to have Mean = 100 and Standard Deviation = 15)
- Auditory Comprehension subscale from PLS-5<sup>2</sup>
- PPVT-4<sup>3</sup> Score

If missing score for any subscale, then RLI was set to missing.

DAS-2 = Differential Abilities Scale, Second Edition

PLS-5 = Preschool Language Scale, Fifth Edition

PPVT-4 = Peabody Picture Vocabulary Test, Fourth Edition

1. Elliott CD. Differential Ability Scales (2nd edition). San Antonio, TX: Harcourt Assessment, 2007.
2. Zimmerman, IL, Steiner, VG, Pond, RE. Preschool Language Scale, Fifth Edition. Bloomington, MN: Pearson Education, Inc/PsychCorp, 2011.
3. Dunn L, Dunn D. Peabody Picture Vocabulary Test. 4th ed. Minneapolis, MN: Pearson Assessments, 2007.

## eAppendix 3. Additional Details of Statistical Analyses

### Primary Analysis Models:

Covariates for Primary Analysis #1: Mother's study group, IQ, education level, age at enrollment, illicit substance use during pregnancy, major depressive episode during pregnancy, post-birth perceived stress (PSS) score, and child's sex, birthweight, and small for gestational age.

Covariates for Primary Analysis #2: Mother's third trimester max observed ratio ASM Concentration, IQ, education level, age at enrollment, smoking during pregnancy, post-birth anxiety (BAI) score, ASM group (Monotherapy/Polytherapy), McMaster FAD problematic family functioning at child's 2-year visit, and child's sex, small for gestational age.

Mother's max ratio defined daily dose (DDD) during the third trimester was not considered for inclusion in the model for primary analysis 2 due to collinearity with ratio blood levels in the third trimester.

### Calculation of Ratio of ASM Blood Concentration and Ratio of Defined Daily Dose

To compare exposure across ASMs combined, the ratio of ASM blood concentration and ratio of defined daily dose (ratio DDD) were derived as follows:

The ratio of ASM blood concentration was calculated for each ASM by dividing the maternal ASM concentration by the upper limit of the suggested therapeutic ranges, mostly taken from published ranges,<sup>1</sup> or clinical laboratory references used by Stanford clinics. For mothers on polytherapy at the time of blood draw, the sum of the ratio of ASM blood concentration across all ASMs was used for analysis and was computed only if all ASMs mothers were taking were measured. ASM concentrations below lower limit of quantification were included and imputed as ½ the lower level of quantification (LLoQ) for that ASM. ASM blood concentrations below lower limit of detection and collected less than 72 hours after the last dose were included and imputed with a concentration value of 0.001 for analysis. ASM blood concentrations below lower limit of detection from blood samples collected 72 hours or more after the mother's last dose were set to missing and the ratio of ASM concentration was not calculated. The maximum observed ratio ASM concentration within the 3rd trimester, including the ASM concentration from the day of delivery, was used for analysis.

| ASM (ug/mL)   | Lower Limit | Upper Limit | LLoQ |
|---------------|-------------|-------------|------|
| Carbamazepine | 4           | 12          | 0.31 |
| Gabapentin    | 4           | 20          | 0.06 |
| Lacosamide    | 1           | 10          | 0.1  |
| Lamotrigine   | 2.5         | 15          | 0.31 |
| Levetiracetam | 10          | 40          | 0.1  |
| Oxcarbazepine | 10          | 40          | 0.5  |
| Phenobarbital | 15          | 40          | 0.5  |
| Phenytoin     | 10          | 20          | 0.5  |



|            |    |     |      |
|------------|----|-----|------|
| Pregabalin | 2  | 5   | 0.06 |
| Topiramate | 10 | 20  | 0.38 |
| Valproate  | 50 | 100 | -    |
| Zonisamide | 10 | 40  | 0.63 |

The ratio DDD was calculated by dividing the maternal ASM dose by the WHO defined daily dose values<sup>2</sup>. The sum of the ratio DDDs across all ASMs were used for polytherapies. The maximum ratio DDD within the 3rd trimester was used for analyses with dose. Employing DDD provided a larger sample size than ASM concentrations.

| ASM (mg/day)  | DDD  |
|---------------|------|
| Carbamazepine | 1000 |
| Clonazepam    | 8    |
| Ethosuximide  | 1250 |
| Felbamate     | 2400 |
| Gabapentin    | 1800 |
| Lacosamide    | 300  |
| Lamotrigine   | 300  |
| Levetiracetam | 1500 |
| Oxcarbazepine | 1000 |
| Phenobarbital | 100  |
| Phenytoin     | 300  |
| Pregabalin    | 300  |
| Topiramate    | 300  |
| Valproate     | 1500 |
| Zonisamide    | 200  |

ASM exposure analyses were restricted to children of women with epilepsy on ASM at enrollment.

1. St Louis EK. Minimizing AED adverse effects: improving quality of life in the interictal state in epilepsy care [published correction appears in *Curr Neuropharmacol*. 2010;8(1):82]. *Curr Neuropharmacol*. 2009;7(2):106-114.
2. WHO Collaborating Centre for Drug Statistics Methodology. WHO ATC/DDD Index 2021. [https://www.whocc.no/atc\\_ddd\\_index/](https://www.whocc.no/atc_ddd_index/) (updated December 17, 2020. (accessed 4/9/2022).

### Variables included in Imputation Models

Separate imputation models were used for analyses of children of women with epilepsy (WWE) and women without epilepsy (WWoE) and for analyses of children of WWE on ASM. The imputation model for children of WWE and WWoE included the following variables a priori: mother's study group, mother's IQ, all risk factors, and covariates selected using the stepwise selection algorithm. The imputation model for children of WWE with 3rd trimester ASM concentrations included the following variables a priori: maximum observed 3rd trimester ratio ASM concentration, mother's IQ, maximum 3rd

trimester ratio DDD, all risk factors, and covariates selected using the stepwise selection algorithm. Additional potential covariates and the indicator variable for twin birth (Y/N) were assessed for inclusion in the imputation models and were included if they met one of the following criteria. These criteria were assessed separately for each of the imputation models:

- Associated with age 4.5 ABAS-3 general adaptive composite (GAC) score in univariate analysis ( $p < 0.2$ )
- Associated with pattern of missingness in age 4.5 ABAS-3 GAC score ( $p < 0.2$ )

Since variables included in the imputation model must be linearly independent. If two or more linearly dependent variables were selected to be included in the imputation model based on the above criteria, the variable with the most categories was included in the model. Variables with >5% missing were excluded from consideration.

Variables included in imputation model for children of women with and without epilepsy:

mother's study group, IQ, age at enrollment, weeks gestational age at enrollment, weeks gestational age at delivery, mother's education level, breastfeeding, folate dose, employment status, household income, planned/welcome pregnancy, major depressive episode during pregnancy, smoking and illicit substance use during pregnancy, lifetime history of anxiety disorder, lifetime history of mood disorder, average anxiety score (BAI), depression score (BDI), and perceived stress score (PSS) during enrollment through 2-year post-birth, enrollment through delivery, and post-delivery through 2-year post-birth, McMaster FAD problematic family functioning at child's 2-year visit, child's sex, birthweight, and small for gestational age.

Variables included in imputation model for children of women with epilepsy on ASM in

3rd trimester: mother's max observed ratio ASM concentration and ratio DDD in 3rd trimester, IQ, weeks gestational age at enrollment, weeks gestational age at delivery, mother's education level, household income, breastfeeding, folate dose, employment status, planned/welcome pregnancy, smoking and illicit substance use during pregnancy, lifetime history of anxiety disorder, lifetime history of mood disorder, ASM group, age at enrollment, average anxiety score (BAI), depression score (BDI), and perceived stress score (PSS) during enrollment through 2-year post-birth, enrollment through delivery, and post-delivery through 2-year post-birth, McMaster FAD problematic family functioning at child's 2-year visit, child's sex, birthweight, and small for gestational age.

## Special Cases

Two special cases were excluded from all analyses.

- Child of woman with epilepsy with a donated ovum
- Child of woman without epilepsy on ASM during pregnancy

**eFigure.** Flowchart of Enrollment and Exclusions

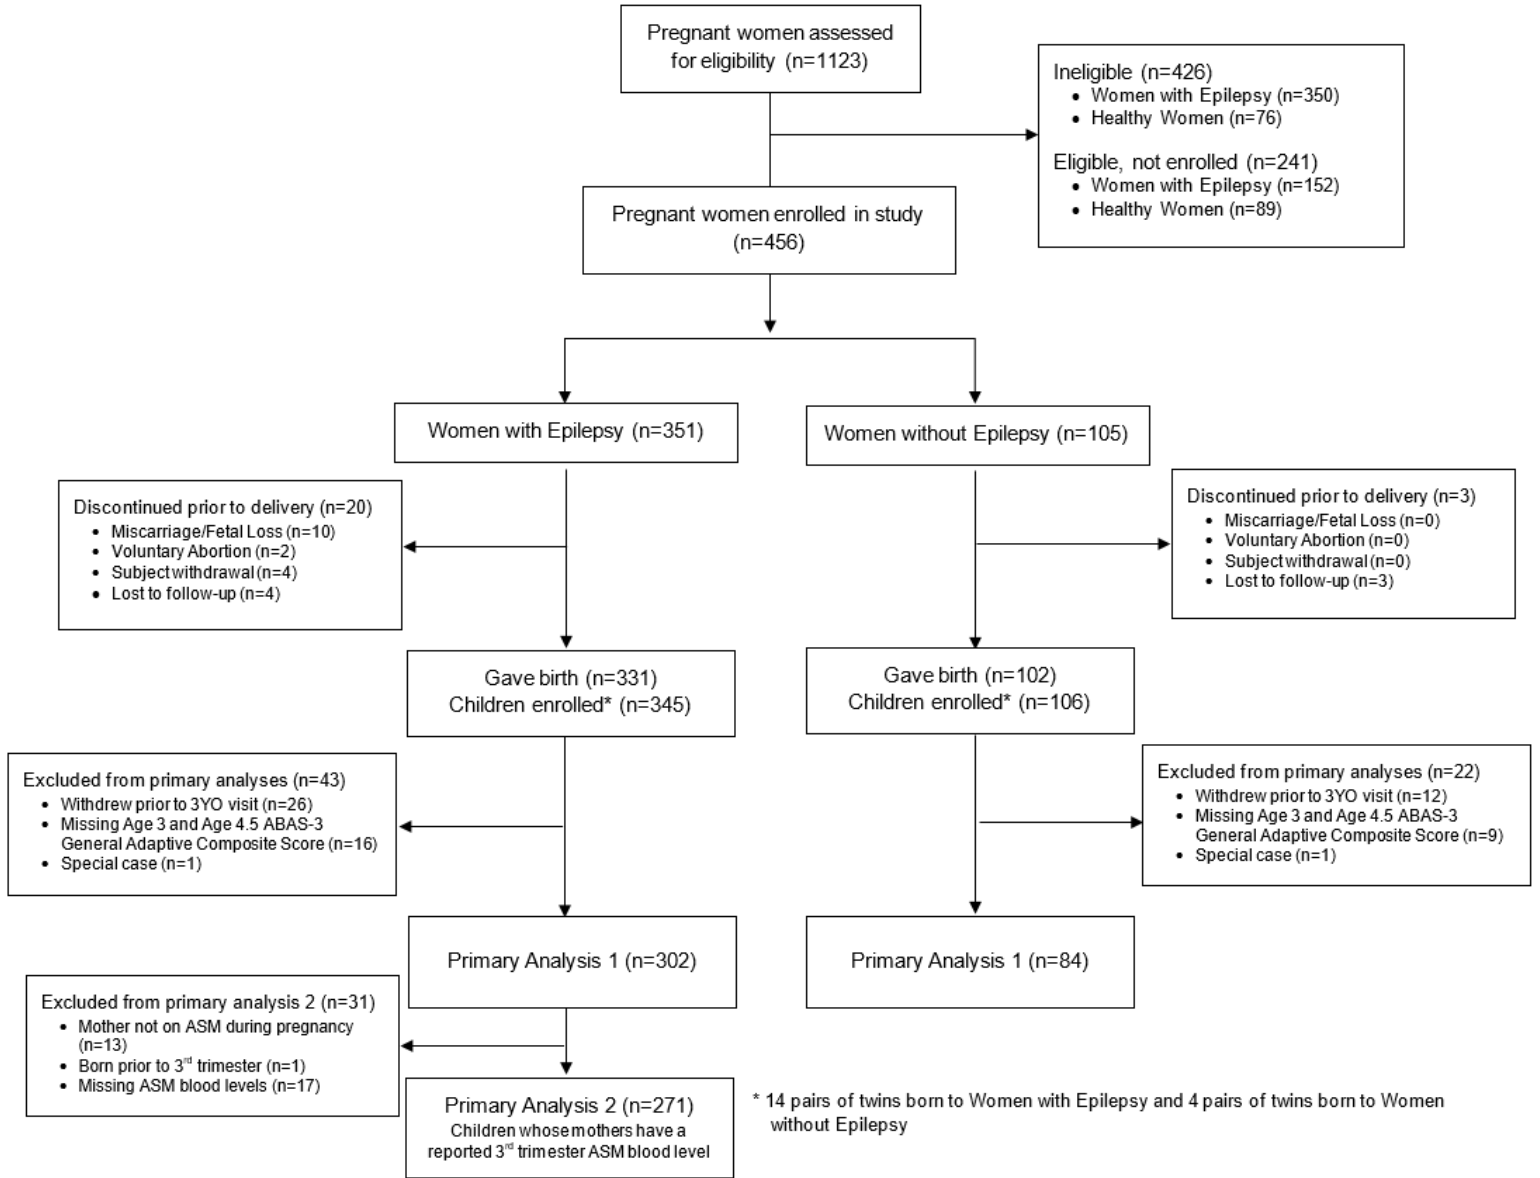

**eTable 1.** Children With Non-Missing Assessments at Ages 2, 3, 4.5

| <b>Children with Non-Missing Assessments, N = 451</b>            |              |
|------------------------------------------------------------------|--------------|
| <b>Assessment</b>                                                | <b>n (%)</b> |
| <b>Age 2</b>                                                     |              |
| Behavior Assessment System for Children, Second Edition (BASC-2) | 386 (85.6)   |
| Modified Checklist for Autism in Toddlers (MCHAT)                | 397 (88.0)   |
| Parenting Stress Index, Fourth Edition (PSI-4)                   | 388 (86.0)   |
| <b>Age 3</b>                                                     |              |
| Adaptive Behavior Assessment System, Third Edition (ABAS-3)      | 374 (82.9)   |
| Behavior Assessment System for Children, Second Edition (BASC-2) | 374 (82.9)   |
| Gilliam Autism Rating Scale, Third Edition (GARS-3)              | 368 (81.6)   |
| Parenting Stress Index, Fourth Edition (PSI-4)                   | 367 (81.4)   |
| <b>Age 4.5</b>                                                   |              |
| Adaptive Behavior Assessment System, Third Edition (ABAS-3)      | 329 (72.9)   |
| Behavior Assessment System for Children, Second Edition (BASC-2) | 330 (73.2)   |
| Parenting Stress Index, Fourth Edition (PSI-4)                   | 328 (72.7)   |
| Social Responsiveness Scale, Second Edition (SRS-2)              | 331 (73.4)   |

**eTable 2.** ABAS-3 General Adaptive Composite Scores at Age 4.5, Before vs After COVID-19 Shutdown, Completers Population, N = 326

|                          | <b>ABAS-3 General Adaptive Composite Scores at Age 4.5</b> |                      |                          |                            |
|--------------------------|------------------------------------------------------------|----------------------|--------------------------|----------------------------|
|                          | <b>N</b>                                                   | <b>Mean (95% CI)</b> | <b>Median (Min, Max)</b> | <b>P-Value<sup>a</sup></b> |
| Before COVID-19 Shutdown | 234                                                        | 101.1 (99.5, 102.6)  | 101 (49, 120)            | 0.942                      |
| After COVID-19 Shutdown  | 92                                                         | 101.2 (98.8, 103.5)  | 100 (52, 120)            |                            |

Notes: COVID-19 shutdown defined as April 1, 2020. There were no children evaluated between March 13, 2020 and June 30, 2020.

N = children with ABAS-3 general adaptive composite scores at age 4.5.

<sup>a</sup> Independent T-test.

To assess the impact of the COVID-19 shutdown, the primary outcome for this manuscript, ABAS-3 General Adaptive Composite scores at age 4.5, were compared before vs. after April 1, 2020. An independent T-test was run, and no difference were found between scores before and after the COVID-19 shutdown. Thus, the impact of COVID-19 was not further considered in this manuscript.

**eTable 3.** Summary of Mother's 3rd Trimester ASM

|                                            | Primary Analysis 1 <sup>a</sup><br>N = 302 | Primary Analysis 2 <sup>b</sup><br>N = 271 |
|--------------------------------------------|--------------------------------------------|--------------------------------------------|
| Mother's 3rd Trimester ASM Regimen         | n (%)                                      | n (%)                                      |
| <b>Monotherapy</b>                         | 226 (74.8)                                 | 219 (80.8)                                 |
| Lamotrigine                                | 99 (32.8)                                  | 98 (36.2)                                  |
| Levetiracetam                              | 78 (25.8)                                  | 77 (28.4)                                  |
| Oxcarbazepine                              | 16 (5.3)                                   | 14 (5.2)                                   |
| Carbamazepine                              | 11 (3.6)                                   | 10 (3.7)                                   |
| Zonisamide                                 | 11 (3.6)                                   | 10 (3.7)                                   |
| Topiramate                                 | 4 (1.3)                                    | 4 (1.5)                                    |
| Lacosamide                                 | 2 (0.7)                                    | 2 (0.7)                                    |
| Valproate                                  | 2 (0.7)                                    | 2 (0.7)                                    |
| Felbamate                                  | 1 (0.3)                                    | -                                          |
| Gabapentin                                 | 1 (0.3)                                    | 1 (0.4)                                    |
| Phenobarbital                              | 1 (0.3)                                    | 1 (0.4)                                    |
| <b>Polytherapy</b>                         | 62 (20.5)                                  | 52 (19.2)                                  |
| Lamotrigine+Levetiracetam                  | 27 (8.9)                                   | 25 (9.2)                                   |
| Lacosamide+Levetiracetam                   | 5 (1.7)                                    | 5 (1.8)                                    |
| Other Polytherapy <sup>c</sup>             | 30 (9.9)                                   | 22 (8.1)                                   |
| <b>No ASM in Pregnancy</b>                 | 13 (4.3)                                   | -                                          |
| <b>No ASM in 3rd Trimester<sup>d</sup></b> | 1 (0.3)                                    | -                                          |

<sup>a</sup> N = children of WWE in primary analysis 1. Mother's ASM regimen at time of blood draw for maximum observed ratio ASM concentration during 3rd trimester (includes day of delivery) or if missing ASM concentration then ASM regimen for maximum ratio DDD during 3rd trimester.

<sup>b</sup> N = children in primary analysis 2. Mother's ASM regimen at time of blood draw for maximum observed ratio ASM concentration during 3rd trimester (includes day of delivery).

<sup>c</sup> Other polytherapy includes three or fewer children with mothers on Carbamazepine+Lamotrigine, Carbamazepine+Levetiracetam, Clonazepam+Lamotrigine, Ethosuximide+Lamotrigine, Ethosuximide+Lamotrigine+Levetiracetam+Zonisamide, Felbamate+Oxcarbazepine+Topiramate, Gabapentin+Lamotrigine, Lacosamide+Lamotrigine, Lacosamide+Topiramate, Lamotrigine+Levetiracetam+Zonisamide, Lamotrigine+Oxcarbazepine, Lamotrigine+Oxcarbazepine+Valproate, Lamotrigine+Pregabalin, Lamotrigine+Topiramate, Lamotrigine+Valproate, Lamotrigine+Zonisamide, Levetiracetam+Oxcarbazepine, Levetiracetam+Phenobarbital, Levetiracetam+Phenytoin, Levetiracetam+Topiramate, Levetiracetam+Zonisamide, Oxcarbazepine+Zonisamide.

<sup>d</sup> One child was born in the second trimester and had no 3rd trimester ASM exposure. Mother was on Levetiracetam monotherapy during pregnancy.

**eTable 4.** Demographic, Baseline Characteristics, and Risk Factors for Children of WWE vs WWoE, Categorical Variables, Children in Primary Analysis 1, N = 386

|                                                              | Children of WWE,<br>N = 302 | Children of WWoE,<br>N = 84 |                      |
|--------------------------------------------------------------|-----------------------------|-----------------------------|----------------------|
|                                                              | n (%)                       | n (%)                       | P-Value <sup>a</sup> |
| <b>Child's Sex</b>                                           |                             |                             | 0.326                |
| Female                                                       | 159 (52.6)                  | 39 (46.4)                   |                      |
| Male                                                         | 143 (47.4)                  | 45 (53.6)                   |                      |
| <b>Child's Race</b>                                          |                             |                             | 0.008                |
| White                                                        | 243 (80.5)                  | 55 (65.5)                   |                      |
| Black or African American                                    | 15 (5.0)                    | 11 (13.1)                   |                      |
| Other/Unknown                                                | 44 (14.6)                   | 18 (21.4)                   |                      |
| <b>Child's Ethnicity - Hispanic or Latino</b>                | 57 (18.9)                   | 20 (23.8)                   | 0.354                |
| <b>Twin</b>                                                  | 23 (7.6)                    | 6 (7.1)                     | 1.000                |
| <b>Small for Gestational Age (SGA)</b>                       | 17 (5.8)                    | 7 (8.4)                     | 0.444                |
| Missing                                                      | 8                           | 1                           |                      |
| <b>Major Congenital Malformations</b>                        | 18 (6.0)                    | 1 (1.2)                     | 0.089                |
| <b>Any Breastfeeding</b>                                     | 232 (77.1)                  | 75 (89.3)                   | 0.014                |
| Missing                                                      | 1                           | 0                           |                      |
| <b>Periconceptual Folate Use</b>                             | 268 (88.7)                  | 56 (66.7)                   | <.001                |
| <b>Periconceptual Folate Dose</b>                            |                             |                             | <.001                |
| 0 mg                                                         | 34 (11.4)                   | 28 (34.1)                   |                      |
| > 0 - 0.4 mg                                                 | 25 (8.4)                    | 13 (15.9)                   |                      |
| > 0.4 - 1 mg                                                 | 58 (19.4)                   | 32 (39.0)                   |                      |
| > 1 - 4 mg                                                   | 160 (53.5)                  | 9 (11.0)                    |                      |
| > 4 mg                                                       | 22 (7.4)                    | 0 (0.0)                     |                      |
| Missing                                                      | 3                           | 2                           |                      |
| <b>Pregnancy Planned/Welcomed</b>                            |                             |                             | 0.499                |
| Planned                                                      | 220 (72.8)                  | 56 (66.7)                   |                      |
| Unplanned/Welcome                                            | 73 (24.2)                   | 25 (29.8)                   |                      |
| Unplanned/Unwelcome                                          | 9 (3.0)                     | 3 (3.6)                     |                      |
| <b>Major Depressive Episode During Pregnancy<sup>b</sup></b> | 12 (4.0)                    | 1 (1.2)                     | 0.314                |
| <b>Mother's Education</b>                                    |                             |                             | 0.284                |
| College Degree (Advanced)                                    | 82 (27.2)                   | 30 (35.7)                   |                      |
| College Degree (Not Advanced)                                | 137 (45.4)                  | 32 (38.1)                   |                      |
| No College Degree                                            | 83 (27.5)                   | 22 (26.2)                   |                      |
| <b>Mother's Employment</b>                                   |                             |                             | 0.456                |
| Employed full-time                                           | 169 (56.0)                  | 46 (54.8)                   |                      |

|                                                                         | Children of WWE,<br>N = 302 | Children of WWoE,<br>N = 84 |                      |
|-------------------------------------------------------------------------|-----------------------------|-----------------------------|----------------------|
|                                                                         | n (%)                       | n (%)                       | P-Value <sup>a</sup> |
| Employed part-time                                                      | 45 (14.9)                   | 17 (20.2)                   |                      |
| Unemployed <sup>c</sup>                                                 | 88 (29.1)                   | 21 (25.0)                   |                      |
| <b>Household Income</b>                                                 |                             |                             | 0.918                |
| Subject desires not to answer                                           | 17 (5.6)                    | 4 (4.8)                     |                      |
| \$24,999 or less                                                        | 50 (16.6)                   | 15 (17.9)                   |                      |
| \$25,000-49,999                                                         | 33 (10.9)                   | 7 (8.3)                     |                      |
| \$50,000-74,999                                                         | 43 (14.2)                   | 9 (10.7)                    |                      |
| \$75,000-99,999                                                         | 53 (17.5)                   | 17 (20.2)                   |                      |
| \$100,000 and up                                                        | 106 (35.1)                  | 32 (38.1)                   |                      |
| <b>Smoking<sup>d</sup></b>                                              | 19 (6.3)                    | 5 (6.0)                     | 1.000                |
| <b>Alcohol Use<sup>d</sup></b>                                          | 70 (23.2)                   | 32 (38.1)                   | 0.008                |
| <b>Illicit Substance Use<sup>d</sup></b>                                | 9 (3.0)                     | 4 (4.8)                     | 0.490                |
| Missing                                                                 | 1                           | 1                           |                      |
| <b>McMaster FAD Problematic Family Functioning at Child's 2YO Visit</b> | 53 (18.5)                   | 12 (14.6)                   | 0.512                |
| Missing                                                                 | 16                          | 2                           |                      |
| <b>Lifetime History of Mood Disorder<sup>e</sup></b>                    | 49 (16.5)                   | 11 (13.6)                   | 0.609                |
| Missing                                                                 | 5                           | 3                           |                      |
| <b>Lifetime History of Anxiety Disorder<sup>e</sup></b>                 | 47 (15.8)                   | 12 (14.8)                   | 1.000                |
| Missing                                                                 | 5                           | 3                           |                      |

FAD = Family Assessment Device

Note: Missing not used in calculation of percentages or in p-values.

<sup>a</sup> P-Values from Fisher's Exact Test.

<sup>b</sup> Depression based on SCID Mood Module at any depression assessment during pregnancy.

<sup>c</sup> Unemployed includes stay at home parent without outside job, unemployed due to disability, full-time student and looking for work.

<sup>d</sup> Self-reported smoking, alcohol use, or illicit substance use (including marijuana) at any time during pregnancy.

<sup>e</sup> Diagnosis from SCID.



**eTable 5.** Demographic, Baseline Characteristics, and Risk Factors for Children of WWE vs WWoE, Continuous Variables, Children in Primary Analysis 1, N = 386

|                                                      | Children of WWE,<br>N = 302 |                         |                      | Children of WWoE,<br>N = 84 |                         |                      | P-Value <sup>a</sup> |
|------------------------------------------------------|-----------------------------|-------------------------|----------------------|-----------------------------|-------------------------|----------------------|----------------------|
|                                                      | N                           | Mean<br>(95% CI)        | Median<br>(Min, Max) | N                           | Mean<br>(95% CI)        | Median<br>(Min, Max) |                      |
| <b>WGA at Birth</b>                                  | 302                         | 38.4<br>(38.2, 38.7)    | 39 (24, 42)          | 84                          | 38.6<br>(38.1, 39.0)    | 39 (26, 43)          | 0.651                |
| <b>WGA at Enrollment</b>                             | 302                         | 13.5<br>(12.9, 14.0)    | 14 (4, 29)           | 84                          | 15.5<br>(14.6, 16.3)    | 16 (5, 23)           | <.001                |
| <b>Birthweight (kg)</b>                              | 295                         | 3.22<br>(3.16, 3.29)    | 3.2 (0.6, 4.9)       | 84                          | 3.26<br>(3.13, 3.39)    | 3.3 (1.1, 5.0)       | 0.614                |
| <b>Mother's Age at Enrollment</b>                    | 302                         | 30.8<br>(30.3, 31.4)    | 31 (18, 46)          | 84                          | 29.8<br>(28.7, 30.9)    | 31 (15, 38)          | 0.085                |
| <b>Mother's IQ</b>                                   | 302                         | 98.3<br>(96.8, 99.7)    | 100 (58, 124)        | 84                          | 104.6<br>(101.7, 107.5) | 106 (72, 131)        | <.001                |
| <b>Father's IQ<sup>b</sup></b>                       | 204                         | 104.1<br>(102.3, 106.0) | 105 (58, 139)        | 46                          | 104.0<br>(99.8, 108.2)  | 102 (75, 136)        | 0.947                |
| <b>Maternal Relative's IQ<sup>b</sup></b>            | 111                         | 100.8<br>(97.8, 103.8)  | 102 (51, 133)        | 29                          | 103.0<br>(98.7, 107.3)  | 103 (74, 125)        | 0.493                |
| <b>Beck Depression Inventory-2 (BDI)<sup>c</sup></b> |                             |                         |                      |                             |                         |                      |                      |
| Enrollment - 2YO Visit                               | 301                         | 6.31<br>(5.72, 6.90)    | 5.3 (0.0, 36.8)      | 84                          | 5.12<br>(4.29, 5.95)    | 4.7 (0.0, 24.0)      | 0.088                |
| Pregnancy                                            | 302                         | 7.09<br>(6.45, 7.73)    | 5.7 (0.0, 38.7)      | 84                          | 5.90<br>(5.03, 6.77)    | 5.0 (0.0, 17.7)      | 0.112                |
| Post-Birth                                           | 301                         | 5.83<br>(5.18, 6.47)    | 4.5 (0.0, 35.6)      | 84                          | 4.53<br>(3.57, 5.50)    | 3.7 (0.0, 29.0)      | 0.060                |
| <b>Beck Anxiety Inventory (BAI)<sup>c</sup></b>      |                             |                         |                      |                             |                         |                      |                      |
| Enrollment - 2YO Visit                               | 301                         | 5.19<br>(4.65, 5.74)    | 3.8 (0.0, 34.1)      | 84                          | 3.54<br>(2.69, 4.39)    | 2.7 (0.0, 26.0)      | <.001                |

|                                                           | Children of WWE,<br>N = 302 |                         |                      | Children of WWoE,<br>N = 84 |                         |                      | P-Value <sup>a</sup> |
|-----------------------------------------------------------|-----------------------------|-------------------------|----------------------|-----------------------------|-------------------------|----------------------|----------------------|
|                                                           | N                           | Mean<br>(95% CI)        | Median<br>(Min, Max) | N                           | Mean<br>(95% CI)        | Median<br>(Min, Max) |                      |
| Pregnancy                                                 | 302                         | 6.41<br>(5.75, 7.06)    | 4.8 (0.0, 38.3)      | 84                          | 4.94<br>(3.94, 5.94)    | 3.4 (0.0, 29.3)      | 0.033                |
| Post-Birth                                                | 301                         | 4.41<br>(3.87, 4.96)    | 3.0 (0.0, 31.6)      | 84                          | 2.62<br>(1.78, 3.45)    | 1.5 (0.0, 23.5)      | <.001                |
| <b>Perceived Stress Scale-14 (PSS)<sup>c</sup></b>        |                             |                         |                      |                             |                         |                      |                      |
| Enrollment - 2YO Visit                                    | 301                         | 17.88<br>(17.12, 18.63) | 17.6 (3.3, 40.6)     | 84                          | 16.88<br>(15.77, 17.98) | 17.2 (6.4, 29.1)     | 0.324                |
| Pregnancy                                                 | 302                         | 17.96<br>(17.15, 18.78) | 17.7 (2.7, 40.0)     | 84                          | 16.33<br>(15.02, 17.64) | 15.7 (3.3, 30.5)     | 0.092                |
| Post-Birth                                                | 301                         | 17.83<br>(17.03, 18.64) | 17.6 (2.0, 41.0)     | 84                          | 17.16<br>(15.97, 18.35) | 16.9 (6.2, 33.0)     | 0.535                |
| <b>Pittsburgh Sleep Quality Index (PSQI)<sup>bd</sup></b> |                             |                         |                      |                             |                         |                      |                      |
| Pregnancy +Postpartum                                     | 237                         | 5.74<br>(5.41, 6.07)    | 5.6 (0.1, 13.7)      | 64                          | 5.25<br>(4.65, 5.85)    | 5.0 (1.0, 12.3)      | 0.171                |
| Pregnancy                                                 | 276                         | 5.76<br>(5.41, 6.12)    | 5.3 (0.0, 15.5)      | 75                          | 4.70<br>(4.12, 5.28)    | 4.3 (1.0, 11.8)      | 0.005                |
| Postpartum                                                | 240                         | 5.69<br>(5.35, 6.03)    | 5.4 (0.0, 13.6)      | 64                          | 5.64<br>(4.94, 6.34)    | 5.8 (0.3, 12.5)      | 0.890                |

WGA = weeks gestational age

<sup>a</sup> P-Values from T-Test (WGA at Birth, WGA at Enrollment, Birthweight, Age, IQ Scores, PSQI Scores) and Wilcoxon Rank-Sum Test (BDI, BAI, and PSS Scores).

<sup>b</sup> Father's IQ, Maternal Relative's IQ, and PSQI Scores not assessed for inclusion in imputation model due to extensive missing data.

<sup>c</sup> Average of all assessments completed during time period. Enrollment - 2YO Visit: enrollment through 2YO visit; Pregnancy: enrollment through day of delivery; Post-Birth: post-delivery through 2YO visit.

<sup>d</sup> Weighted monthly average of PSQI assessments completed during time period. At most one PSQI score per day was used in the calculation. Pregnancy: Enrollment through the day before delivery; Postpartum: 6 weeks

|  | Children of WWE,<br>N = 302 |                  |                      | Children of WWoE,<br>N = 84 |                  |                      |                      |
|--|-----------------------------|------------------|----------------------|-----------------------------|------------------|----------------------|----------------------|
|  | N                           | Mean<br>(95% CI) | Median<br>(Min, Max) | N                           | Mean<br>(95% CI) | Median<br>(Min, Max) | P-Value <sup>a</sup> |

through 9 months post-delivery; Pregnancy+Postpartum: Assessments completed during either period (only women with scores in both periods included).

**eTable 6.** Demographic, Baseline Characteristics, and Risk Factors for Children of WWE and Mothers with Max Observed Ratio ASM Concentration in 3rd Trimester, Categorical Variables, Children in Primary Analysis 2, N = 271

|                                               | <b>N = 271</b> |
|-----------------------------------------------|----------------|
|                                               | <b>n (%)</b>   |
| <b>Child's Sex</b>                            |                |
| Female                                        | 143 (52.8)     |
| Male                                          | 128 (47.2)     |
| <b>Child's Race</b>                           |                |
| White                                         | 223 (82.3)     |
| Black or African American                     | 11 (4.1)       |
| Other/Unknown                                 | 37 (13.7)      |
| <b>Child's Ethnicity - Hispanic or Latino</b> | 54 (19.9)      |
| <b>Twin</b>                                   | 19 (7.0)       |
| <b>Small for Gestational Age (SGA)</b>        | 15 (5.7)       |
| Missing                                       | 6              |
| <b>Major Congenital Malformations</b>         | 13 (4.8)       |
| <b>Any Breastfeeding</b>                      | 208 (77.0)     |
| Missing                                       | 1              |
| <b>Periconceptual Folate Use</b>              | 239 (88.2)     |
| <b>Periconceptual Folate Dose</b>             |                |
| 0 mg                                          | 32 (11.9)      |
| > 0 - 0.4 mg                                  | 19 (7.0)       |
| > 0.4 - 1 mg                                  | 51 (18.9)      |
| > 1 - 4 mg                                    | 146 (54.1)     |
| > 4 mg                                        | 22 (8.1)       |
| Missing                                       | 1              |

|                                                                         | <b>N = 271</b> |
|-------------------------------------------------------------------------|----------------|
|                                                                         | <b>n (%)</b>   |
| <b>Pregnancy Planned/Welcomed</b>                                       |                |
| Planned                                                                 | 200 (73.8)     |
| Unplanned/Welcome                                                       | 63 (23.2)      |
| Unplanned/Unwelcome                                                     | 8 (3.0)        |
| <b>Major Depressive Episode During Pregnancy<sup>a</sup></b>            | 11 (4.1)       |
| <b>Mother's Education</b>                                               |                |
| College Degree (Advanced)                                               | 75 (27.7)      |
| College Degree (Not Advanced)                                           | 126 (46.5)     |
| No College Degree                                                       | 70 (25.8)      |
| <b>Mother's Employment</b>                                              |                |
| Employed full-time                                                      | 158 (58.3)     |
| Employed part-time                                                      | 41 (15.1)      |
| Unemployed <sup>b</sup>                                                 | 72 (26.6)      |
| <b>Household Income</b>                                                 |                |
| Subject desires not to answer                                           | 11 (4.1)       |
| \$24,999 or less                                                        | 45 (16.6)      |
| \$25,000-49,999                                                         | 28 (10.3)      |
| \$50,000-74,999                                                         | 37 (13.7)      |
| \$75,000-99,999                                                         | 48 (17.7)      |
| \$100,000 and up                                                        | 102 (37.6)     |
| <b>Smoking<sup>c</sup></b>                                              | 14 (5.2)       |
| <b>Alcohol Use<sup>c</sup></b>                                          | 64 (23.6)      |
| <b>Illicit Substance Use<sup>c</sup></b>                                | 8 (3.0)        |
| Missing                                                                 | 1              |
| <b>McMaster FAD Problematic Family Functioning at Child's 2YO Visit</b> | 48 (18.7)      |

|                                                         | <b>N = 271</b> |
|---------------------------------------------------------|----------------|
|                                                         | <b>n (%)</b>   |
| Missing                                                 | 14             |
| <b>Lifetime History of Mood Disorder<sup>d</sup></b>    | 41 (15.4)      |
| Missing                                                 | 4              |
| <b>Lifetime History of Anxiety Disorder<sup>d</sup></b> | 39 (14.6)      |
| Missing                                                 | 4              |
| <b>Seizure Type<sup>e</sup></b>                         |                |
| Focal                                                   | 164 (60.5)     |
| Generalized                                             | 87 (32.1)      |
| Unclassified/Mixed                                      | 20 (7.4)       |
| <b>5 or More Convulsions During Pregnancy</b>           | 9 (3.3)        |
| Missing                                                 | 1              |

FAD = Family Assessment Device

Note: Missing not used in calculation of percentages.

<sup>a</sup> Depression based on SCID Mood Module at any depression assessment during pregnancy.

<sup>b</sup> Unemployed includes stay at home parent without outside job, unemployed due to disability, full-time student and looking for work.

<sup>c</sup> Self-reported smoking, alcohol use, or illicit substance use (including marijuana) at any time during pregnancy.

<sup>d</sup> Diagnosis from SCID.

<sup>e</sup> Three children had mothers who reported multiple seizure types, 2 reported generalized & focal seizures and 1 reported generalized & unclassified seizures.

**eTable 7.** Demographic, Baseline Characteristics, and Risk Factors for Children of WWE and Mothers With Max Observed Ratio ASM Concentration in 3rd Trimester, Continuous Variables, Children in Primary Analysis 2, N = 271

|                                                           | <b>N</b> | <b>Mean (95% CI)</b> | <b>Median (Min, Max)</b> |
|-----------------------------------------------------------|----------|----------------------|--------------------------|
| <b>WGA at Birth</b>                                       | 271      | 38.6 (38.4, 38.8)    | 39 (33, 42)              |
| <b>WGA at Enrollment</b>                                  | 271      | 13.4 (12.8, 13.9)    | 14 (4, 29)               |
| <b>Birthweight (kg)</b>                                   | 266      | 3.27 (3.20, 3.33)    | 3.3 (1.7, 4.9)           |
| <b>Mother's Age at Enrollment</b>                         | 271      | 31.0 (30.4, 31.6)    | 31 (18, 46)              |
| <b>Mother's IQ</b>                                        | 271      | 98.8 (97.3, 100.3)   | 100 (65, 124)            |
| <b>Father's IQ<sup>a</sup></b>                            | 189      | 104.6 (102.7, 106.6) | 105 (58, 139)            |
| <b>Maternal Relative's IQ<sup>a</sup></b>                 | 100      | 101.5 (98.4, 104.7)  | 104 (51, 133)            |
| <b>Beck Depression Inventory-2 (BDI)<sup>b</sup></b>      |          |                      |                          |
| Enrollment - 2YO Visit                                    | 270      | 6.11 (5.49, 6.73)    | 5.1 (0.0, 36.8)          |
| Pregnancy                                                 | 271      | 6.91 (6.22, 7.60)    | 5.3 (0.0, 38.7)          |
| Post-Birth                                                | 270      | 5.61 (4.95, 6.26)    | 4.4 (0.0, 35.6)          |
| <b>Beck Anxiety Inventory (BAI)<sup>b</sup></b>           |          |                      |                          |
| Enrollment - 2YO Visit                                    | 270      | 5.01 (4.43, 5.58)    | 3.5 (0.0, 34.1)          |
| Pregnancy                                                 | 271      | 6.18 (5.50, 6.86)    | 4.7 (0.0, 38.3)          |
| Post-Birth                                                | 270      | 4.24 (3.67, 4.81)    | 2.7 (0.0, 31.6)          |
| <b>Perceived Stress Scale-14 (PSS)<sup>b</sup></b>        |          |                      |                          |
| Enrollment - 2YO Visit                                    | 270      | 17.67 (16.87, 18.46) | 17.2 (3.3, 40.6)         |
| Pregnancy                                                 | 271      | 17.71 (16.84, 18.58) | 17.3 (2.7, 40.0)         |
| Post-Birth                                                | 270      | 17.65 (16.80, 18.50) | 17.5 (2.0, 41.0)         |
| <b>Pittsburgh Sleep Quality Index (PSQI)<sup>ac</sup></b> |          |                      |                          |
| Pregnancy+Postpartum                                      | 213      | 5.71 (5.36, 6.06)    | 5.6 (0.1, 13.7)          |
| Pregnancy                                                 | 248      | 5.69 (5.31, 6.06)    | 5.1 (0.0, 15.5)          |
| Postpartum                                                | 215      | 5.66 (5.30, 6.02)    | 5.3 (0.0, 13.6)          |
| <b>Convulsions During Pregnancy</b>                       | 270      | 0.6 (0.3, 0.9)       | 0 (0, 28)                |

|                                                                              | <b>N</b> | <b>Mean (95% CI)</b> | <b>Median (Min, Max)</b> |
|------------------------------------------------------------------------------|----------|----------------------|--------------------------|
| <b>Max Observed Ratio ASM Concentration<sup>d</sup> During 3rd Trimester</b> | 271      | 0.52 (0.48, 0.56)    | 0.4 (0.0, 1.9)           |
| <b>Max Ratio DDD<sup>e</sup> During 3rd Trimester</b>                        | 271      | 2.21 (2.05, 2.38)    | 2.0 (0.2, 8.3)           |

WGA = weeks gestational age

<sup>a</sup> Father's IQ, Maternal Relative's IQ, and PSQI Scores not assessed for inclusion in imputation model due to extensive missing data.

<sup>b</sup> Average of all assessments completed during time period. Enrollment - 2YO Visit: enrollment through 2YO visit; Pregnancy: enrollment through day of delivery; Post-Birth: post-delivery through 2YO visit.

<sup>c</sup> Weighted monthly average of PSQI assessments completed during time period. At most one PSQI score per day was used in the calculation. Pregnancy: Enrollment through the day before delivery; Postpartum: 6 weeks through 9 months post-delivery; Pregnancy+Postpartum: Assessments completed during either period (only women with scores in both periods included).

<sup>d</sup> Ratio ASM Concentration calculated as ratio upper limit for therapeutic range. For mothers on polytherapy, ratio ASM Concentration calculated by summing the ratio ASM Concentration for each ASM. Maximum observed value recorded during 3rd trimester, including day of delivery.

<sup>e</sup> Ratio DDD = Ratio Defined Daily Dose, calculated by dividing the mother's ASM total prescribed daily dose by the WHO defined daily dose values. For mothers on polytherapy, ratio DDD equals the sum across the ratio DDD for all ASMs.



**eTable 8.** Association Between Age 4.5 ABAS-3 General Adaptive Composite Score and Maximum Observed Ratio ASM Concentration<sup>a</sup> During 3rd Trimester by ASM Category, Children of WWE With 3rd Trimester Blood Levels, Completers Population

| 3rd Trimester ASM Category <sup>d</sup> | Unadjusted Analysis <sup>b</sup> |                             |         | Adjusted Analysis <sup>c</sup> |                             |         |
|-----------------------------------------|----------------------------------|-----------------------------|---------|--------------------------------|-----------------------------|---------|
|                                         | N                                | Parameter Estimate (95% CI) | P-value | N                              | Parameter Estimate (95% CI) | P-value |
| Lamotrigine                             | 79                               | -11.0 (-24.1, 2.1)          | 0.101   | 77                             | -12.0 (-23.7, -0.3)         | 0.044   |
| Levetiracetam                           | 70                               | -16.5 (-25.2, -7.8)         | <.001   | 63                             | -18.9 (-26.8, -10.9)        | <.001   |
| Other Monotherapy                       | 31                               | 7.6 (-10.0, 25.2)           | 0.396   | 30                             | 8.3 (-7.7, 24.2)            | 0.307   |
| Lamotrigine+Levetiracetam               | 24                               | -3.6 (-15.3, 8.1)           | 0.547   | 22                             | -1.5 (-13.9, 10.8)          | 0.808   |
| Other Polytherapy                       | 25                               | -11.5 (-24.8, 1.8)          | 0.091   | 25                             | -11.5 (-23.6, 0.5)          | 0.061   |

Notes: N = children of WWE with Age 4.5 ABAS-3 General Adaptive Composite Score and mother with max observed ratio ASM concentration in 3rd trimester.

12 children were excluded from the adjusted analysis due to missing covariates.

<sup>a</sup> Ratio ASM Concentration calculated as ratio upper limit for therapeutic range. For mothers on polytherapy, ratio ASM concentration calculated by summing the ratio ASM concentration for each ASM. Maximum observed value recorded during 3rd trimester, including day of delivery.

<sup>b</sup> Linear regression model with Mother's ASM blood levels, ASM Category, and their interaction. P-value for interaction term: 0.128

<sup>c</sup> Linear regression model with Mother's ASM blood levels, ASM Category, and their interaction, mother's IQ, education level, age at enrollment, smoking during pregnancy, post-birth average BAI score through child's 2YO visit, McMaster FAD problematic family functioning at child's 2YO Visit, and child's sex and small for gestational age status. Mother's ASM group was not included as a covariate in model. P-value for interaction term: 0.022

<sup>d</sup> Based on ASM regimen taken at time of blood draw for maximum observed ratio ASM concentration during 3rd trimester (includes day of delivery).

**eTable 9.** Association Between Age 4.5 ABAS-3 General Adaptive Composite Score and Maximum Observed Ratio ASM Concentration<sup>a</sup> During 3rd Trimester by ASM Group, Children of WWE With 3rd Trimester Blood Levels, Completers Population

| 3rd Trimester ASM Group <sup>d</sup> | Unadjusted Analysis <sup>b</sup> |                             |         | Adjusted Analysis <sup>c</sup> |                             |         |
|--------------------------------------|----------------------------------|-----------------------------|---------|--------------------------------|-----------------------------|---------|
|                                      | N                                | Parameter Estimate (95% CI) | P-value | N                              | Parameter Estimate (95% CI) | P-value |
| Monotherapy                          | 180                              | -9.6 (-16.0, -3.2)          | 0.003   | 170                            | -10.7 (-16.6, -4.8)         | <.001   |
| Polytherapy                          | 49                               | -7.6 (-16.5, 1.2)           | 0.091   | 47                             | -6.9 (-15.6, 1.9)           | 0.122   |

Notes: N = children of WWE with Age 4.5 ABAS-3 General Adaptive Composite Score and mother with max observed ratio ASM Concentration in 3rd trimester.

12 children were excluded from the adjusted analysis due to missing covariates.

<sup>a</sup> Ratio ASM Concentration calculated as ratio upper limit for therapeutic range. For mothers on polytherapy, ratio ASM concentration calculated by summing the ratio ASM concentration for each ASM. Maximum observed value recorded during 3rd trimester, including day of delivery.

<sup>b</sup> Linear regression model with Mother's ASM blood levels, ASM Group, and their interaction. P-value for interaction term: 0.720

<sup>c</sup> Linear regression model with Mother's ASM blood levels, ASM Group, and their interaction, mother's IQ, education level, age at enrollment, smoking during pregnancy, post-birth average BAI score through child's 2YO visit, McMaster FAD problematic family functioning at child's 2YO Visit, and child's sex and small for gestational age status. P-value for interaction term: 0.484

<sup>d</sup> Based on ASM regimen taken at time of blood draw for maximum observed ratio ASM concentration during 3rd trimester (includes day of delivery).

**eTable 10.** Association Between Age 4.5 ABAS-3 General Adaptive Composite Score and Mother's Maximum Ratio DDD<sup>a</sup> During 3rd Trimester, Children of WWE on ASM in 3rd Trimester, Completers Population

|                                          | Unadjusted Analysis <sup>b</sup> |                             |         | Adjusted Analysis <sup>c</sup> |                             |         |
|------------------------------------------|----------------------------------|-----------------------------|---------|--------------------------------|-----------------------------|---------|
|                                          | N                                | Parameter Estimate (95% CI) | P-value | N                              | Parameter Estimate (95% CI) | P-value |
| 3rd Trimester Max Ratio DDD <sup>a</sup> | 239                              | -1.99 (-2.89, -1.08)        | <.001   | 226                            | -1.94 (-3.07, -0.82)        | <.001   |

Notes: N = children of WWE on ASM during 3rd Trimester with Age 4.5 ABAS-3 General Adaptive Composite Score. 13 children were excluded from the adjusted analysis due to missing covariates.

<sup>a</sup> Ratio DDD = Ratio Defined Daily Dose, calculated by dividing the mother's ASM total prescribed daily dose by the WHO defined daily dose values. For mothers on polytherapy, ratio DDD equals the sum across the ratio DDD for all ASMs. Maximum ratio DDD during 3rd trimester used for analysis.

<sup>b</sup> Linear regression model.

<sup>c</sup> Linear regression model adjusted for mother's IQ, education level, age at enrollment, maximum ratio DDD ASM Group (monotherapy/polytherapy), smoking during pregnancy, post-birth average BAI score through child's 2YO visit, McMaster

FAD problematic family functioning at child's 2YO Visit, and child's sex and small for gestational age status.

**eTable 11.** Association Between Age 4.5 ABAS-3 General Adaptive Composite Score and Mother’s Maximum Ratio DDD<sup>a</sup> During 3rd Trimester by ASM Category, Children of WWE on ASM in 3rd Trimester, Completers Population

| 3rd Trimester ASM Category <sup>d</sup> | Unadjusted Analysis <sup>b</sup> |                             |         | Adjusted Analysis <sup>c</sup> |                             |         |
|-----------------------------------------|----------------------------------|-----------------------------|---------|--------------------------------|-----------------------------|---------|
|                                         | N                                | Parameter Estimate (95% CI) | P-value | N                              | Parameter Estimate (95% CI) | P-value |
| Lamotrigine                             | 78                               | -2.5 (-4.9, -0.1)           | 0.043   | 76                             | -2.2 (-4.4, 0.0)            | 0.053   |
| Levetiracetam                           | 71                               | -5.6 (-8.6, -2.6)           | <.001   | 63                             | -6.6 (-9.4, -3.9)           | <.001   |
| Other Monotherapy                       | 33                               | 1.8 (-3.5, 7.2)             | 0.506   | 32                             | 3.7 (-1.3, 8.7)             | 0.144   |
| Lamotrigine+Levetiracetam               | 24                               | -1.2 (-5.0, 2.6)            | 0.528   | 22                             | 0.0 (-3.8, 3.8)             | 0.999   |
| Other Polytherapy                       | 33                               | -1.9 (-3.7, -0.1)           | 0.039   | 33                             | -1.0 (-2.7, 0.7)            | 0.249   |

Notes: N = children of WWE on ASM during 3rd Trimester with Age 4.5 ABAS-3 General Adaptive Composite Score. 13 children were excluded from the adjusted analysis due to missing covariates.

<sup>a</sup> Ratio DDD = Ratio Defined Daily Dose, calculated by dividing the mother’s ASM total prescribed daily dose by the WHO defined daily dose values. For mothers on polytherapy, ratio DDD equals the sum across the ratio DDD for all ASMs. Maximum ratio DDD during 3rd trimester used for analysis.

<sup>b</sup> Linear regression model with Mother’s max ratio DDD, ASM Category, and their interaction. P-value for interaction term: 0.111

<sup>c</sup> Linear regression model with Mother’s max ratio DDD, ASM Category, and their interaction, mother’s IQ, education level, age at enrollment, smoking during pregnancy, post-birth average BAI score through child’s 2YO visit, McMaster FAD problematic family functioning at child’s 2YO Visit, and child’s sex and small for gestational age status. Mother’s ASM group was not included as a covariate in model. P-value for interaction term: 0.002

<sup>d</sup> Based on prescribed ASM regimen at time of max ratio DDD during 3rd trimester.

**eTable 12.** Association Between Age 4.5 ABAS-3 General Adaptive Composite Score and Mother's Maximum Ratio DDD<sup>a</sup> During 3rd Trimester by ASM Group, Children of WWE on ASM in 3rd Trimester, Completers Population

| 3rd Trimester ASM Group <sup>d</sup> | Unadjusted Analysis <sup>b</sup> |                             |         | Adjusted Analysis <sup>c</sup> |                             |         |
|--------------------------------------|----------------------------------|-----------------------------|---------|--------------------------------|-----------------------------|---------|
|                                      | N                                | Parameter Estimate (95% CI) | P-value | N                              | Parameter Estimate (95% CI) | P-value |
| Monotherapy                          | 182                              | -2.8 (-4.5, -1.1)           | 0.001   | 171                            | -3.0 (-4.5, -1.4)           | <.001   |
| Polytherapy                          | 57                               | -1.8 (-3.4, -0.1)           | 0.034   | 55                             | -0.9 (-2.5, 0.7)            | 0.278   |

Notes: N = children of WWE on ASM during 3rd Trimester with Age 4.5 ABAS-3 General Adaptive Composite Score. 13 children were excluded from the adjusted analysis due to missing covariates.

<sup>a</sup> Ratio DDD = Ratio Defined Daily Dose, calculated by dividing the mother's ASM total prescribed daily dose by the WHO defined daily dose values. For mothers on polytherapy, ratio DDD equals the sum across the ratio DDD for all ASMs. Maximum ratio DDD during 3rd trimester used for analysis.

<sup>b</sup> Linear regression model with Mother's max ratio DDD, ASM Group, and their interaction. P-value for interaction term: 0.388

<sup>c</sup> Linear regression model with Mother's max ratio DDD, ASM Group, and their interaction, mother's IQ, education level, age at enrollment, smoking during pregnancy, post-birth average BAI score through child's 2YO visit, McMaster FAD problematic family functioning at child's 2YO Visit, and child's sex and small for gestational age status. P-value for interaction term: 0.069

<sup>d</sup> Based on prescribed ASM regimen at time of max ratio DDD during 3rd trimester.

**eTable 13.** Age 4.5 ABAS-3 General Adaptive Composite Score by Breastfeeding Status, Folate Use, and Folate Dose, Children of WWE and WWoE, Completers Population

| Risk Factor                            | Unadjusted Analysis <sup>a</sup> |                         |         | Adjusted Analysis <sup>b</sup> |                         |         |
|----------------------------------------|----------------------------------|-------------------------|---------|--------------------------------|-------------------------|---------|
|                                        | N                                | Mean (95% CI)           | P-value | N                              | LS Mean (95% CI)        | P-value |
| <b>Breastfeeding</b>                   |                                  |                         | 0.035   |                                |                         | 0.590   |
| Any                                    | 259                              | 101.8<br>(100.3, 103.3) |         | 255                            | 101.3 (99.9, 102.6)     |         |
| None                                   | 67                               | 98.3 (95.5, 101.2)      |         | 66                             | 100.4 (97.5, 103.2)     |         |
| <b>Periconceptual Folate Use</b>       |                                  |                         | 0.005   |                                |                         | 0.187   |
| Any                                    | 274                              | 101.9<br>(100.5, 103.2) |         | 271                            | 101.5<br>(100.2, 102.8) |         |
| None                                   | 52                               | 96.9 (92.8, 100.9)      |         | 50                             | 99.0 (95.7, 102.3)      |         |
| <b>Periconceptual Folate Dose (mg)</b> |                                  |                         | 0.058   |                                |                         | 0.590   |
| None                                   | 52                               | 96.9 (92.8, 100.9)      |         | 50                             | 98.8 (95.4, 102.1)      |         |
| > 0-0.4                                | 33                               | 100.7 (97.2, 104.2)     |         | 33                             | 100.4 (96.6, 104.2)     |         |
| > 0.4-1.0                              | 72                               | 101.3 (98.6, 104.0)     |         | 71                             | 101.1 (98.5, 103.6)     |         |
| > 1.0-4.0                              | 149                              | 102.2<br>(100.3, 104.1) |         | 147                            | 101.8<br>(100.0, 103.7) |         |
| > 4.0                                  | 17                               | 104.4 (99.7, 109.1)     |         | 17                             | 103.2 (97.9, 108.5)     |         |

Notes: N = children with Age 4.5 ABAS-3 General Adaptive Composite Score and mother with non-missing risk factor. 5 children were excluded from adjusted analyses due to missing covariates.

<sup>a</sup> Linear regression model.

<sup>b</sup> Linear regression model adjusted for mother's study group, IQ, education level, age at enrollment, illicit drug-use during pregnancy, major depressive episode during pregnancy, post-birth average PSS score through child's 2YO visit, and child's sex, birthweight, and small for gestational age status.

**eTable 14.** Association Between Age 4.5 ABAS-3 General Adaptive Composite Score and Mother's Sleep Quality (PSQI), Children of WWE and WWoE, Completers Population

| Time Period <sup>c</sup> | Unadjusted Analysis <sup>a</sup> |                     |         | Adjusted Analysis <sup>b</sup> |                     |         |
|--------------------------|----------------------------------|---------------------|---------|--------------------------------|---------------------|---------|
|                          | N                                | Estimate (95% CI)   | P-value | N                              | Estimate (95% CI)   | P-value |
| Pregnancy+Postpartum     | 260                              | -0.50 (-1.05, 0.06) | 0.080   | 256                            | -0.14 (-0.75, 0.47) | 0.655   |
| Pregnancy                | 298                              | -0.45 (-0.92, 0.02) | 0.060   | 293                            | -0.13 (-0.62, 0.37) | 0.609   |
| Postpartum               | 262                              | -0.34 (-0.85, 0.17) | 0.195   | 258                            | -0.12 (-0.67, 0.43) | 0.665   |

Notes: N = children with Age 4.5 ABAS-3 General Adaptive Composite Score and mother with non-missing PSQI score. Children with missing covariates excluded from adjusted analyses. PSQI = Pittsburgh Sleep Quality Index

<sup>a</sup> Linear regression model.

<sup>b</sup> Linear regression model adjusted for mother's study group, IQ, education level, age at enrollment, illicit drug-use during pregnancy, major depressive episode during pregnancy, post-birth average PSS score through child's 2YO visit, and child's sex, birthweight, and small for gestational age status.

<sup>c</sup> Weighted monthly average of PSQI assessments completed during time period. At most one PSQI score per day was used in the calculation. Pregnancy: Enrollment through the day before delivery; Postpartum: 6 weeks through 9 months post-delivery;

Pregnancy+Postpartum: Assessments completed during either period (only women with scores in both periods included).

**eTable 15.** Age 4.5 ABAS-3 General Adaptive Composite Score by Breastfeeding Status, Folate Use, and Folate Dose, Children of WWE on ASM in 3rd Trimester, Completers Population

| Risk Factor                              | Unadjusted Analysis <sup>a</sup> |                      |         | Adjusted Analysis <sup>b</sup> |                     |         |
|------------------------------------------|----------------------------------|----------------------|---------|--------------------------------|---------------------|---------|
|                                          | N                                | Mean (95% CI)        | P-value | N                              | LS Mean (95% CI)    | P-value |
| <b>Breastfeeding</b>                     |                                  |                      | 0.024   |                                |                     | 0.463   |
| Any                                      | 180                              | 102.1 (100.4, 103.9) |         | 165                            | 101.6 (99.9, 103.2) |         |
| None                                     | 59                               | 98.1 (95.0, 101.2)   |         | 52                             | 100.2 (97.1, 103.3) |         |
| <b>Periconceptional Folate Use</b>       |                                  |                      | 0.024   |                                |                     | 0.862   |
| Any                                      | 212                              | 101.8 (100.2, 103.3) |         | 192                            | 101.3 (99.8, 102.8) |         |
| None                                     | 27                               | 96.2 (90.6, 101.9)   |         | 25                             | 100.9 (96.3, 105.4) |         |
| <b>Periconceptional Folate Dose (mg)</b> |                                  |                      | 0.073   |                                |                     | 0.937   |
| None                                     | 27                               | 96.2 (90.6, 101.9)   |         | 25                             | 100.9 (96.3, 105.5) |         |
| > 0-0.4                                  | 17                               | 98.9 (93.6, 104.1)   |         | 16                             | 99.2 (93.9, 104.5)  |         |
| > 0.4-1.0                                | 41                               | 99.7 (96.3, 103.0)   |         | 40                             | 101.1 (97.7, 104.5) |         |
| > 1.0-4.0                                | 137                              | 102.4 (100.3, 104.5) |         | 120                            | 101.6 (99.6, 103.6) |         |
| > 4.0                                    | 17                               | 104.4 (99.7, 109.1)  |         | 16                             | 101.9 (96.6, 107.1) |         |

Notes: N = children of WWE with Age 4.5 ABAS-3 General Adaptive Composite Score and mother on ASM in 3rd trimester. 22 children were excluded from adjusted analyses due to missing covariates.

<sup>a</sup> Linear regression model.

<sup>b</sup> Linear regression model adjusted for mother's 3rd trimester max observed ratio ASM concentration, ASM Group (monotherapy/polytherapy), IQ, education level, age at enrollment, smoking during pregnancy, post-birth average BAI score through child's 2YO visit, McMaster FAD problematic family functioning at child's 2YO Visit, and child's sex and small for gestational age status.



**eTable 16.** Association Between Age 4.5 ABAS-3 General Adaptive Composite Score and Maternal Sleep Quality (PSQI), Children of WWE on ASM in 3rd Trimester, Completers Population

| Time Period <sup>c</sup> | Unadjusted Analysis <sup>a</sup> |                      |         | Adjusted Analysis <sup>b</sup> |                     |         |
|--------------------------|----------------------------------|----------------------|---------|--------------------------------|---------------------|---------|
|                          | N                                | Estimate (95% CI)    | P-value | N                              | Estimate (95% CI)   | P-value |
| Pregnancy+Postpartum     | 193                              | -0.74 (-1.37, -0.11) | 0.021   | 176                            | -0.22 (-0.87, 0.43) | 0.498   |
| Pregnancy                | 220                              | -0.58 (-1.12, -0.04) | 0.035   | 201                            | -0.17 (-0.72, 0.37) | 0.536   |
| Postpartum               | 195                              | -0.48 (-1.07, 0.11)  | 0.111   | 178                            | -0.11 (-0.70, 0.47) | 0.702   |

Notes: N = children of WWE with Age 4.5 ABAS-3 General Adaptive Composite Score and mother on ASM in 3rd Trimester and with non-missing PSQI score. Children with missing covariates excluded from adjusted analyses. PSQI = Pittsburgh Sleep Quality Index.

<sup>a</sup> Linear regression model.

<sup>b</sup> Linear regression model adjusted for mother's 3rd trimester max observed ratio ASM concentration, ASM Group (monotherapy/polytherapy), IQ, education level, age at enrollment, smoking during pregnancy, post-birth average BAI score through child's 2YO visit, McMaster FAD problematic family functioning at child's 2YO Visit, and child's sex and small for gestational age status.

<sup>c</sup> Weighted monthly average of PSQI assessments completed during time period. At most one PSQI score per day was used in the calculation. Pregnancy: Enrollment through the day before delivery; Postpartum: 6 weeks through 9 months post-delivery; Pregnancy+Postpartum: Assessments completed during either period (only women with scores in both periods included).

**eTable 17.** Association Between Age 4.5 ABAS-3 General Adaptive Composite Score and Maternal Psychiatric Risk Factors (BDI, BAI, PSS), Children of WWE and WWoE, Completers Population

| Assessment/Time Period <sup>c</sup>      | Unadjusted Analysis <sup>a</sup> |                      |         | Adjusted Analysis <sup>b</sup> |                      |         |
|------------------------------------------|----------------------------------|----------------------|---------|--------------------------------|----------------------|---------|
|                                          | N                                | Estimate (95% CI)    | P-value | N                              | Estimate (95% CI)    | P-value |
| <b>Beck Depression Inventory 2 (BDI)</b> |                                  |                      |         |                                |                      |         |
| Enrollment - 2YO Visit                   | 326                              | -0.38 (-0.64, -0.13) | 0.003   | 321                            | -0.38 (-0.65, -0.11) | 0.006   |
| Pregnancy                                | 326                              | -0.27 (-0.51, -0.03) | 0.028   | 321                            | -0.22 (-0.48, 0.04)  | 0.098   |
| Post-Birth                               | 326                              | -0.37 (-0.60, -0.14) | 0.002   | 321                            | -0.38 (-0.62, -0.14) | 0.002   |
| <b>Beck Anxiety Inventory (BAI)</b>      |                                  |                      |         |                                |                      |         |
| Enrollment - 2YO Visit                   | 326                              | -0.55 (-0.82, -0.28) | <.001   | 321                            | -0.48 (-0.76, -0.19) | 0.001   |
| Pregnancy                                | 326                              | -0.38 (-0.61, -0.15) | 0.001   | 321                            | -0.29 (-0.53, -0.05) | 0.019   |
| Post-Birth                               | 326                              | -0.56 (-0.83, -0.29) | <.001   | 321                            | -0.51 (-0.79, -0.22) | <.001   |
| <b>Perceived Stress Scale 14 (PSS)</b>   |                                  |                      |         |                                |                      |         |
| Enrollment - 2YO Visit                   | 326                              | -0.45 (-0.65, -0.25) | <.001   | 321                            | -0.41 (-0.62, -0.21) | <.001   |
| Pregnancy                                | 326                              | -0.35 (-0.53, -0.17) | <.001   | 321                            | -0.31 (-0.50, -0.12) | 0.002   |
| Post-Birth                               | 326                              | -0.42 (-0.60, -0.23) | <.001   | 321                            | -0.38 (-0.56, -0.19) | <.001   |

Notes: N = children with Age 4.5 ABAS-3 General Adaptive Composite Score. 5 children were excluded from adjusted analyses due to missing covariates.

<sup>a</sup> Linear regression model.

<sup>b</sup> Linear regression model adjusted for mother's study group, IQ, education level, age at enrollment, illicit drug-use during pregnancy, major depressive episode during pregnancy, and child's sex, birthweight, and small for gestational age status. Model was not adjusted for mother's post-birth average PSS score.

<sup>c</sup> Average of all assessments completed during time period. Enrollment - 2YO Visit: enrollment through mother's 2YO visit; Pregnancy: enrollment through day of delivery; Post-Birth: post-delivery through 2YO visit.

**eTable 18.** Association Between Age 4.5 ABAS-3 General Adaptive Composite Score and Mother Psychiatric Risk Factors (BDI, BAI, PSS), Children of WWE on ASM in 3rd Trimester, Completers Population

| Assessment/Time Period <sup>c</sup>      | Unadjusted Analysis <sup>a</sup> |                      |         | Adjusted Analysis <sup>b</sup> |                      |         |
|------------------------------------------|----------------------------------|----------------------|---------|--------------------------------|----------------------|---------|
|                                          | N                                | Estimate (95% CI)    | P-value | N                              | Estimate (95% CI)    | P-value |
| <b>Beck Depression Inventory 2 (BDI)</b> |                                  |                      |         |                                |                      |         |
| Enrollment - 2YO Visit                   | 239                              | -0.47 (-0.75, -0.20) | <.001   | 217                            | -0.18 (-0.45, 0.10)  | 0.203   |
| Pregnancy                                | 239                              | -0.32 (-0.58, -0.06) | 0.015   | 217                            | -0.12 (-0.37, 0.13)  | 0.353   |
| Post-Birth                               | 239                              | -0.48 (-0.73, -0.22) | <.001   | 217                            | -0.19 (-0.45, 0.07)  | 0.153   |
| <b>Beck Anxiety Inventory (BAI)</b>      |                                  |                      |         |                                |                      |         |
| Enrollment - 2YO Visit                   | 239                              | -0.61 (-0.91, -0.32) | <.001   | 217                            | -0.38 (-0.67, -0.08) | 0.013   |
| Pregnancy                                | 239                              | -0.43 (-0.68, -0.17) | 0.001   | 217                            | -0.27 (-0.52, -0.01) | 0.039   |
| Post-Birth                               | 239                              | -0.64 (-0.95, -0.34) | <.001   | 217                            | -0.38 (-0.68, -0.09) | 0.011   |
| <b>Perceived Stress Scale 14 (PSS)</b>   |                                  |                      |         |                                |                      |         |
| Enrollment - 2YO Visit                   | 239                              | -0.50 (-0.72, -0.28) | <.001   | 217                            | -0.26 (-0.49, -0.03) | 0.027   |
| Pregnancy                                | 239                              | -0.40 (-0.60, -0.20) | <.001   | 217                            | -0.22 (-0.42, -0.01) | 0.041   |
| Post-Birth                               | 239                              | -0.47 (-0.67, -0.26) | <.001   | 217                            | -0.22 (-0.44, -0.01) | 0.041   |

Notes: N = children of WWE with Age 4.5 ABAS-3 General Adaptive Composite Score and mother on ASM in 3rd trimester. 22 children were excluded from adjusted analyses due to missing covariates.

<sup>a</sup> Linear regression model.

<sup>b</sup> Linear regression model adjusted for mother's 3rd trimester max observed ratio ASM concentration, ASM Group (monotherapy/polytherapy), IQ, education level, age at enrollment, smoking during pregnancy, McMaster FAD problematic family functioning at child's 2YO Visit, and child's sex and small for gestational age status. Model was not adjusted for mother's post-birth average BAI score.

<sup>c</sup> Average of all assessments completed during time period. Enrollment - 2YO Visit: enrollment through mother's 2YO visit; Pregnancy: enrollment through day of delivery; Post-Birth: post-delivery through 2YO visit

**eTable 19.** Continuous Behavior Scores by Mother’s Study Group and Child’s Age, Children of WWE vs WWoE, Completers Population

|                                                         |                      | Unadjusted <sup>a</sup> |                      |         | Adjusted <sup>ab</sup> |                      |         |
|---------------------------------------------------------|----------------------|-------------------------|----------------------|---------|------------------------|----------------------|---------|
| Child's Age                                             | Mother's Study Group | N                       | LS Mean (95% CI)     | P-Value | N                      | LS Mean (95% CI)     | P-Value |
| <b>ABAS-3 General Adaptive Composite Standard Score</b> |                      |                         |                      |         |                        |                      |         |
| Age 3                                                   | WWE                  | 292                     | 106.5 (105.1, 107.9) | 0.409   | 282                    | 106.6 (105.3, 108.0) | 0.405   |
|                                                         | WWoE                 | 80                      | 107.7 (105.3, 110.2) |         | 78                     | 107.8 (105.5, 110.2) |         |
| Age 4.5                                                 | WWE                  | 253                     | 101.3 (99.8, 102.7)  | 0.833   | 248                    | 101.3 (100.0, 102.6) | 0.809   |
|                                                         | WWoE                 | 73                      | 100.9 (98.2, 103.6)  |         | 73                     | 101.0 (98.4, 103.5)  |         |
| <i>P-Value for Interaction Term<sup>c</sup></i>         |                      | -                       | -                    | 0.281   | -                      | -                    | 0.278   |
| <b>ABAS-3 Conceptual Composite Standard Score</b>       |                      |                         |                      |         |                        |                      |         |
| Age 3                                                   | WWE                  | 293                     | 105.8 (104.3, 107.4) | 0.113   | 283                    | 106.1 (104.7, 107.5) | 0.191   |
|                                                         | WWoE                 | 81                      | 108.2 (105.7, 110.7) |         | 79                     | 108.0 (105.6, 110.4) |         |
| Age 4.5                                                 | WWE                  | 253                     | 101.8 (100.3, 103.3) | 0.810   | 248                    | 102.0 (100.7, 103.3) | 0.919   |
|                                                         | WWoE                 | 73                      | 102.2 (99.3, 105.1)  |         | 73                     | 101.8 (99.1, 104.5)  |         |
| <i>P-Value for Interaction Term<sup>c</sup></i>         |                      | -                       | -                    | 0.174   | -                      | -                    | 0.160   |
| <b>ABAS-3 Social Composite Standard Score</b>           |                      |                         |                      |         |                        |                      |         |
| Age 3                                                   | WWE                  | 292                     | 107.7 (106.3, 109.2) | 0.843   | 282                    | 107.8 (106.4, 109.2) | 0.874   |
|                                                         | WWoE                 | 81                      | 108.0 (105.4, 110.6) |         | 79                     | 108.0 (105.5, 110.6) |         |
| Age 4.5                                                 | WWE                  | 256                     | 101.7 (100.4, 103.0) | 0.918   | 250                    | 101.7 (100.5, 102.9) | 0.883   |
|                                                         | WWoE                 | 73                      | 101.5 (98.9, 104.2)  |         | 73                     | 101.5 (99.0, 104.0)  |         |
| <i>P-Value for Interaction Term<sup>c</sup></i>         |                      | -                       | -                    | 0.783   | -                      | -                    | 0.789   |
| <b>ABAS-3 Practical Composite Standard Score</b>        |                      |                         |                      |         |                        |                      |         |
| Age 3                                                   | WWE                  | 293                     | 105.7 (104.2, 107.1) | 0.424   | 283                    | 105.9 (104.5, 107.3) | 0.510   |
|                                                         | WWoE                 | 80                      | 106.9 (104.4, 109.4) |         | 78                     | 106.8 (104.5, 109.2) |         |
| Age 4.5                                                 | WWE                  | 255                     | 102.2 (100.8, 103.6) | 0.773   | 249                    | 102.4 (101.0, 103.7) | 0.654   |
|                                                         | WWoE                 | 73                      | 101.7 (99.0, 104.5)  |         | 73                     | 101.7 (99.2, 104.2)  |         |

|                                                 |                      | Unadjusted <sup>a</sup> |                   |         | Adjusted <sup>ab</sup> |                   |         |
|-------------------------------------------------|----------------------|-------------------------|-------------------|---------|------------------------|-------------------|---------|
| Child's Age                                     | Mother's Study Group | N                       | LS Mean (95% CI)  | P-Value | N                      | LS Mean (95% CI)  | P-Value |
| <i>P-Value for Interaction Term<sup>c</sup></i> |                      | -                       | -                 | 0.259   | -                      | -                 | 0.265   |
| <b>BASC-2 Hyperactivity Subscale T-Score</b>    |                      |                         |                   |         |                        |                   |         |
| Age 2                                           | WWE                  | 296                     | 49.5 (48.5, 50.5) | 0.089   | 289                    | 49.5 (48.5, 50.5) | 0.028   |
|                                                 | WwoE                 | 90                      | 47.7 (46.0, 49.5) |         | 88                     | 47.4 (45.7, 49.0) |         |
| Age 3                                           | WWE                  | 291                     | 48.0 (47.0, 49.1) | 0.482   | 282                    | 47.9 (46.9, 49.0) | 0.362   |
|                                                 | WwoE                 | 83                      | 47.2 (45.3, 49.2) |         | 81                     | 47.0 (45.1, 48.8) |         |
| Age 4.5                                         | WWE                  | 256                     | 48.1 (46.9, 49.3) | 0.580   | 249                    | 48.2 (47.0, 49.4) | 0.368   |
|                                                 | WwoE                 | 74                      | 47.4 (45.0, 49.7) |         | 74                     | 47.1 (44.9, 49.3) |         |
| <i>P-Value for Interaction Term<sup>c</sup></i> |                      | -                       | -                 | 0.615   | -                      | -                 | 0.551   |
| <b>BASC-2 Aggression Subscale T-Score</b>       |                      |                         |                   |         |                        |                   |         |
| Age 2                                           | WWE                  | 296                     | 44.6 (43.7, 45.4) | 0.976   | 289                    | 44.5 (43.7, 45.3) | 0.747   |
|                                                 | WwoE                 | 90                      | 44.6 (43.2, 46.0) |         | 88                     | 44.3 (42.8, 45.7) |         |
| Age 3                                           | WWE                  | 291                     | 45.6 (44.7, 46.5) | 0.661   | 282                    | 45.7 (44.8, 46.6) | 0.929   |
|                                                 | WwoE                 | 82                      | 46.0 (44.2, 47.9) |         | 80                     | 45.6 (43.8, 47.3) |         |
| Age 4.5                                         | WWE                  | 255                     | 45.7 (44.7, 46.6) | 0.845   | 248                    | 45.8 (44.9, 46.7) | 0.721   |
|                                                 | WwoE                 | 74                      | 45.9 (44.0, 47.7) |         | 74                     | 45.5 (43.7, 47.2) |         |
| <i>P-Value for Interaction Term<sup>c</sup></i> |                      | -                       | -                 | 0.920   | -                      | -                 | 0.968   |
| <b>BASC-2 Anxiety Subscale T-Score</b>          |                      |                         |                   |         |                        |                   |         |
| Age 2                                           | WWE                  | 294                     | 44.7 (43.9, 45.6) | 0.852   | 287                    | 44.8 (43.9, 45.6) | 0.914   |
|                                                 | WwoE                 | 90                      | 44.6 (43.2, 46.0) |         | 88                     | 44.7 (43.2, 46.2) |         |
| Age 3                                           | WWE                  | 290                     | 49.8 (48.7, 50.9) | 0.188   | 281                    | 49.8 (48.7, 50.9) | 0.189   |
|                                                 | WwoE                 | 83                      | 48.3 (46.4, 50.2) |         | 81                     | 48.3 (46.4, 50.2) |         |
| Age 4.5                                         | WWE                  | 256                     | 48.5 (47.3, 49.7) | 0.978   | 249                    | 48.4 (47.3, 49.6) | 0.958   |
|                                                 | WwoE                 | 74                      | 48.5 (46.2, 50.8) |         | 74                     | 48.4 (46.1, 50.7) |         |

|                                                 |                      | Unadjusted <sup>a</sup> |                   |         | Adjusted <sup>ab</sup> |                   |         |
|-------------------------------------------------|----------------------|-------------------------|-------------------|---------|------------------------|-------------------|---------|
| Child's Age                                     | Mother's Study Group | N                       | LS Mean (95% CI)  | P-Value | N                      | LS Mean (95% CI)  | P-Value |
| <i>P-Value for Interaction Term<sup>c</sup></i> |                      | -                       | -                 | 0.377   | -                      | -                 | 0.362   |
| <b>BASC-2 Depression Subscale T-Score</b>       |                      |                         |                   |         |                        |                   |         |
| Age 2                                           | WWE                  | 296                     | 46.3 (45.4, 47.1) | 0.263   | 289                    | 46.2 (45.4, 47.1) | 0.301   |
|                                                 | WwoE                 | 90                      | 45.2 (43.6, 46.9) |         | 88                     | 45.3 (43.7, 46.9) |         |
| Age 3                                           | WWE                  | 291                     | 46.3 (45.3, 47.3) | 0.714   | 282                    | 46.3 (45.3, 47.3) | 0.729   |
|                                                 | WwoE                 | 83                      | 45.9 (44.0, 47.8) |         | 81                     | 45.9 (44.0, 47.8) |         |
| Age 4.5                                         | WWE                  | 256                     | 46.7 (45.5, 47.8) | 0.947   | 249                    | 46.6 (45.4, 47.7) | 0.945   |
|                                                 | WwoE                 | 74                      | 46.6 (44.0, 49.1) |         | 74                     | 46.5 (44.0, 49.0) |         |
| <i>P-Value for Interaction Term<sup>c</sup></i> |                      | -                       | -                 | 0.719   | -                      | -                 | 0.779   |
| <b>BASC-2 Somatization Subscale T-Score</b>     |                      |                         |                   |         |                        |                   |         |
| Age 2                                           | WWE                  | 296                     | 46.2 (45.4, 47.1) | 0.064   | 289                    | 46.1 (45.3, 47.0) | 0.191   |
|                                                 | WwoE                 | 90                      | 44.6 (43.1, 46.1) |         | 88                     | 45.0 (43.4, 46.5) |         |
| Age 3                                           | WWE                  | 291                     | 46.7 (45.8, 47.6) | 0.021   | 282                    | 46.7 (45.8, 47.6) | 0.049   |
|                                                 | WwoE                 | 83                      | 44.5 (43.0, 46.1) |         | 81                     | 44.9 (43.4, 46.4) |         |
| Age 4.5                                         | WWE                  | 256                     | 45.0 (44.0, 46.1) | 0.507   | 249                    | 45.0 (44.0, 46.0) | 0.726   |
|                                                 | WwoE                 | 74                      | 44.3 (42.2, 46.3) |         | 74                     | 44.6 (42.5, 46.6) |         |
| <i>P-Value for Interaction Term<sup>c</sup></i> |                      | -                       | -                 | 0.437   | -                      | -                 | 0.395   |
| <b>BASC-2 Atypicality Subscale T-Score</b>      |                      |                         |                   |         |                        |                   |         |
| Age 2                                           | WWE                  | 295                     | 53.4 (52.4, 54.5) | 0.071   | 288                    | 53.6 (52.6, 54.6) | 0.008   |
|                                                 | WwoE                 | 90                      | 51.4 (49.4, 53.4) |         | 88                     | 50.8 (49.0, 52.6) |         |
| Age 3                                           | WWE                  | 291                     | 48.1 (47.1, 49.0) | 0.399   | 282                    | 48.3 (47.3, 49.2) | 0.130   |
|                                                 | WwoE                 | 82                      | 47.2 (45.4, 49.0) |         | 80                     | 46.8 (45.1, 48.5) |         |
| Age 4.5                                         | WWE                  | 255                     | 47.2 (46.2, 48.2) | 0.995   | 248                    | 47.4 (46.4, 48.5) | 0.625   |
|                                                 | WwoE                 | 74                      | 47.2 (44.8, 49.6) |         | 74                     | 46.8 (44.5, 49.1) |         |

|                                                   |                      | Unadjusted <sup>a</sup> |                   |         | Adjusted <sup>ab</sup> |                   |         |
|---------------------------------------------------|----------------------|-------------------------|-------------------|---------|------------------------|-------------------|---------|
| Child's Age                                       | Mother's Study Group | N                       | LS Mean (95% CI)  | P-Value | N                      | LS Mean (95% CI)  | P-Value |
| <i>P-Value for Interaction Term<sup>c</sup></i>   |                      | -                       | -                 | 0.302   | -                      | -                 | 0.237   |
| <b>BASC-2 Withdrawal Subscale T-Score</b>         |                      |                         |                   |         |                        |                   |         |
| Age 2                                             | WWE                  | 295                     | 50.1 (49.2, 51.0) | 0.698   | 288                    | 49.9 (49.0, 50.9) | 0.537   |
|                                                   | WwoE                 | 90                      | 50.5 (48.9, 52.0) |         | 88                     | 50.5 (48.9, 52.1) |         |
| Age 3                                             | WWE                  | 290                     | 46.9 (46.0, 47.9) | 0.205   | 281                    | 46.8 (45.9, 47.8) | 0.125   |
|                                                   | WwoE                 | 83                      | 48.4 (46.3, 50.4) |         | 81                     | 48.6 (46.6, 50.5) |         |
| Age 4.5                                           | WWE                  | 255                     | 47.3 (46.2, 48.4) | 0.969   | 248                    | 47.4 (46.3, 48.4) | 0.988   |
|                                                   | WwoE                 | 74                      | 47.3 (45.0, 49.5) |         | 74                     | 47.3 (45.1, 49.6) |         |
| <i>P-Value for Interaction Term<sup>c</sup></i>   |                      | -                       | -                 | 0.360   | -                      | -                 | 0.277   |
| <b>BASC-2 Attention Problems Subscale T-Score</b> |                      |                         |                   |         |                        |                   |         |
| Age 2                                             | WWE                  | 296                     | 50.9 (49.9, 51.8) | 0.077   | 289                    | 50.9 (49.9, 51.9) | 0.030   |
|                                                   | WwoE                 | 90                      | 49.0 (47.2, 50.8) |         | 88                     | 48.6 (46.8, 50.4) |         |
| Age 3                                             | WWE                  | 291                     | 47.4 (46.4, 48.4) | 0.937   | 282                    | 47.5 (46.5, 48.4) | 0.720   |
|                                                   | WwoE                 | 83                      | 47.4 (45.7, 49.0) |         | 81                     | 47.1 (45.4, 48.8) |         |
| Age 4.5                                           | WWE                  | 256                     | 48.5 (47.4, 49.6) | 0.071   | 249                    | 48.5 (47.5, 49.5) | 0.034   |
|                                                   | WwoE                 | 74                      | 46.4 (44.3, 48.4) |         | 74                     | 46.1 (44.1, 48.1) |         |
| <i>P-Value for Interaction Term<sup>c</sup></i>   |                      | -                       | -                 | 0.075   | -                      | -                 | 0.065   |
| <b>BASC-2 Adaptability Subscale T-Score</b>       |                      |                         |                   |         |                        |                   |         |
| Age 2                                             | WWE                  | 296                     | 51.0 (50.0, 52.0) | 0.909   | 289                    | 51.3 (50.3, 52.2) | 0.387   |
|                                                   | WwoE                 | 90                      | 50.8 (49.0, 52.7) |         | 88                     | 50.3 (48.5, 52.2) |         |
| Age 3                                             | WWE                  | 291                     | 54.2 (53.0, 55.3) | 0.015   | 282                    | 54.3 (53.3, 55.4) | 0.003   |
|                                                   | WwoE                 | 83                      | 51.5 (49.8, 53.3) |         | 81                     | 51.0 (49.1, 52.9) |         |
| Age 4.5                                           | WWE                  | 256                     | 52.9 (51.6, 54.1) | 0.610   | 249                    | 53.2 (52.0, 54.4) | 0.928   |
|                                                   | WwoE                 | 74                      | 53.6 (51.3, 55.9) |         | 74                     | 53.1 (50.7, 55.4) |         |

|                                                 |                      | Unadjusted <sup>a</sup> |                   |         | Adjusted <sup>ab</sup> |                   |         |
|-------------------------------------------------|----------------------|-------------------------|-------------------|---------|------------------------|-------------------|---------|
| Child's Age                                     | Mother's Study Group | N                       | LS Mean (95% CI)  | P-Value | N                      | LS Mean (95% CI)  | P-Value |
| <i>P-Value for Interaction Term<sup>c</sup></i> |                      | -                       | -                 | 0.007   | -                      | -                 | 0.011   |
| <b>BASC-2 Social Skills Subscale T-Score</b>    |                      |                         |                   |         |                        |                   |         |
| Age 2                                           | WWE                  | 296                     | 44.9 (44.0, 45.8) | 0.731   | 289                    | 44.9 (44.0, 45.8) | 0.735   |
|                                                 | WWoE                 | 90                      | 45.2 (43.4, 47.0) |         | 88                     | 45.2 (43.4, 47.1) |         |
| Age 3                                           | WWE                  | 291                     | 54.4 (53.4, 55.4) | 0.273   | 282                    | 54.4 (53.4, 55.4) | 0.298   |
|                                                 | WWoE                 | 83                      | 53.3 (51.6, 55.0) |         | 81                     | 53.3 (51.6, 55.1) |         |
| Age 4.5                                         | WWE                  | 256                     | 54.8 (53.5, 56.0) | 0.143   | 249                    | 54.8 (53.6, 56.0) | 0.122   |
|                                                 | WWoE                 | 74                      | 56.5 (54.5, 58.6) |         | 74                     | 56.6 (54.7, 58.6) |         |
| <i>P-Value for Interaction Term<sup>c</sup></i> |                      | -                       | -                 | 0.015   | -                      | -                 | 0.015   |

N = children with non-missing behavior score. Children with missing covariates excluded from adjusted model.

<sup>a</sup> LS Means and P-Value from a longitudinal generalized linear model with identity link function and generalized estimating equations and unstructured covariance structure including mother's study group, child's age, and their interaction.

<sup>b</sup> Adjusted for IQ, education level, age at enrollment, illicit drug-use during pregnancy, major depressive episode during pregnancy, post-birth average PSS score through child's 2YO visit, and child's sex, birthweight, and small for gestational age status.

<sup>c</sup> P-value for the interaction between mother's study group and child's age calculated using the Score test. If significant, the association between the mother's study group and behavior score differs among child's age.



**eTable 20.** Association Between Continuous Behavior Scores and Maximum Observed Ratio ASM Concentration<sup>a</sup> in 3rd Trimester by Child's Age, Children of WWE With 3rd Trimester Blood Levels, Completers Population

| Child's Age                                             | Unadjusted <sup>b</sup> |                             |         | Adjusted <sup>bc</sup> |                             |         |
|---------------------------------------------------------|-------------------------|-----------------------------|---------|------------------------|-----------------------------|---------|
|                                                         | N                       | Parameter Estimate (95% CI) | P-Value | N                      | Parameter Estimate (95% CI) | P-Value |
| <b>ABAS-3 General Adaptive Composite Standard Score</b> |                         |                             |         |                        |                             |         |
| Age 3                                                   | 261                     | -4.7 (-9.1, -0.2)           | 0.040   | 245                    | -3.9 (-9.9, 2.2)            | 0.211   |
| Age 4.5                                                 | 229                     | -7.8 (-12.1, -3.4)          | <.001   | 217                    | -7.1 (-13.1, -1.1)          | 0.021   |
| <i>P-Value for Interaction Term<sup>d</sup></i>         | -                       | -                           | 0.086   | -                      | -                           | 0.085   |
| <b>ABAS-3 Conceptual Composite Standard Score</b>       |                         |                             |         |                        |                             |         |
| Age 3                                                   | 262                     | -5.4 (-10.4, -0.5)          | 0.031   | 246                    | -4.0 (-10.8, 2.7)           | 0.238   |
| Age 4.5                                                 | 229                     | -6.5 (-11.0, -2.0)          | 0.005   | 217                    | -5.1 (-11.6, 1.3)           | 0.117   |
| <i>P-Value for Interaction Term<sup>d</sup></i>         | -                       | -                           | 0.563   | -                      | -                           | 0.563   |
| <b>ABAS-3 Social Composite Standard Score</b>           |                         |                             |         |                        |                             |         |
| Age 3                                                   | 261                     | -4.3 (-9.0, 0.5)            | 0.079   | 245                    | -3.4 (-9.4, 2.7)            | 0.276   |
| Age 4.5                                                 | 232                     | -8.0 (-12.0, -4.1)          | <.001   | 219                    | -7.6 (-12.9, -2.3)          | 0.005   |
| <i>P-Value for Interaction Term<sup>d</sup></i>         | -                       | -                           | 0.064   | -                      | -                           | 0.044   |
| <b>ABAS-3 Practical Composite Standard Score</b>        |                         |                             |         |                        |                             |         |
| Age 3                                                   | 262                     | -3.8 (-8.2, 0.6)            | 0.088   | 246                    | -3.8 (-9.7, 2.0)            | 0.201   |
| Age 4.5                                                 | 231                     | -7.4 (-11.7, -3.1)          | <.001   | 218                    | -7.5 (-13.4, -1.6)          | 0.013   |
| <i>P-Value for Interaction Term<sup>d</sup></i>         | -                       | -                           | 0.049   | -                      | -                           | 0.053   |
| <b>BASC-2 Hyperactivity Subscale T-Score</b>            |                         |                             |         |                        |                             |         |
| Age 2                                                   | 265                     | 3.7 (0.7, 6.7)              | 0.014   | 256                    | 3.6 (0.0, 7.1)              | 0.047   |
| Age 3                                                   | 260                     | 2.0 (-1.0, 5.1)             | 0.190   | 245                    | 1.5 (-2.1, 5.2)             | 0.412   |
| Age 4.5                                                 | 232                     | 4.7 (0.7, 8.7)              | 0.022   | 218                    | 4.1 (-0.6, 8.8)             | 0.089   |
| <i>P-Value for Interaction Term<sup>d</sup></i>         | -                       | -                           | 0.275   | -                      | -                           | 0.251   |
| <b>BASC-2 Aggression Subscale T-Score</b>               |                         |                             |         |                        |                             |         |

| Child's Age                                     | Unadjusted <sup>b</sup> |                             |         | Adjusted <sup>bc</sup> |                             |         |
|-------------------------------------------------|-------------------------|-----------------------------|---------|------------------------|-----------------------------|---------|
|                                                 | N                       | Parameter Estimate (95% CI) | P-Value | N                      | Parameter Estimate (95% CI) | P-Value |
| Age 2                                           | 265                     | 2.2 (-0.1, 4.4)             | 0.060   | 256                    | 1.9 (-0.8, 4.7)             | 0.173   |
| Age 3                                           | 260                     | 3.0 (0.7, 5.4)              | 0.012   | 245                    | 2.8 (-0.1, 5.7)             | 0.059   |
| Age 4.5                                         | 232                     | 3.7 (1.1, 6.3)              | 0.006   | 218                    | 3.5 (0.3, 6.8)              | 0.032   |
| <i>P-Value for Interaction Term<sup>d</sup></i> | -                       | -                           | 0.507   | -                      | -                           | 0.505   |
| <b>BASC-2 Anxiety Subscale T-Score</b>          |                         |                             |         |                        |                             |         |
| Age 2                                           | 263                     | -0.9 (-3.4, 1.5)            | 0.461   | 254                    | -1.1 (-4.3, 2.1)            | 0.493   |
| Age 3                                           | 259                     | 0.0 (-3.3, 3.4)             | 0.977   | 244                    | -0.3 (-4.3, 3.7)            | 0.883   |
| Age 4.5                                         | 232                     | 1.3 (-1.8, 4.4)             | 0.425   | 218                    | 1.6 (-2.2, 5.5)             | 0.405   |
| <i>P-Value for Interaction Term<sup>d</sup></i> | -                       | -                           | 0.385   | -                      | -                           | 0.216   |
| <b>BASC-2 Depression Subscale T-Score</b>       |                         |                             |         |                        |                             |         |
| Age 2                                           | 265                     | 1.5 (-1.0, 3.9)             | 0.250   | 256                    | 1.0 (-2.4, 4.4)             | 0.569   |
| Age 3                                           | 260                     | 0.7 (-2.3, 3.7)             | 0.634   | 245                    | 0.0 (-3.8, 3.8)             | 0.990   |
| Age 4.5                                         | 232                     | 3.7 (0.2, 7.2)              | 0.039   | 218                    | 3.1 (-1.4, 7.6)             | 0.174   |
| <i>P-Value for Interaction Term<sup>d</sup></i> | -                       | -                           | 0.190   | -                      | -                           | 0.190   |
| <b>BASC-2 Somatization Subscale T-Score</b>     |                         |                             |         |                        |                             |         |
| Age 2                                           | 265                     | 0.5 (-2.4, 3.4)             | 0.734   | 256                    | 0.1 (-3.6, 3.8)             | 0.957   |
| Age 3                                           | 260                     | 0.5 (-2.6, 3.6)             | 0.770   | 245                    | -0.7 (-4.7, 3.3)            | 0.746   |
| Age 4.5                                         | 232                     | 0.3 (-3.2, 3.7)             | 0.878   | 218                    | -0.8 (-4.9, 3.2)            | 0.694   |
| <i>P-Value for Interaction Term<sup>d</sup></i> | -                       | -                           | 0.987   | -                      | -                           | 0.786   |
| <b>BASC-2 Atypicality Subscale T-Score</b>      |                         |                             |         |                        |                             |         |
| Age 2                                           | 264                     | 1.9 (-0.9, 4.8)             | 0.188   | 255                    | 1.9 (-1.3, 5.1)             | 0.246   |
| Age 3                                           | 260                     | 3.5 (0.5, 6.6)              | 0.024   | 245                    | 3.4 (-0.3, 7.1)             | 0.069   |
| Age 4.5                                         | 232                     | 3.5 (0.1, 7.0)              | 0.044   | 218                    | 2.6 (-1.6, 6.8)             | 0.221   |
| <i>P-Value for Interaction Term<sup>d</sup></i> | -                       | -                           | 0.604   | -                      | -                           | 0.653   |

| Child's Age                                       | Unadjusted <sup>b</sup> |                             |         | Adjusted <sup>bc</sup> |                             |         |
|---------------------------------------------------|-------------------------|-----------------------------|---------|------------------------|-----------------------------|---------|
|                                                   | N                       | Parameter Estimate (95% CI) | P-Value | N                      | Parameter Estimate (95% CI) | P-Value |
| <b>BASC-2 Withdrawal Subscale T-Score</b>         |                         |                             |         |                        |                             |         |
| Age 2                                             | 264                     | -0.4 (-3.0, 2.2)            | 0.782   | 255                    | 0.1 (-2.9, 3.1)             | 0.961   |
| Age 3                                             | 259                     | 1.0 (-1.8, 3.8)             | 0.497   | 244                    | 1.3 (-2.1, 4.7)             | 0.460   |
| Age 4.5                                           | 232                     | 1.9 (-1.2, 5.1)             | 0.230   | 218                    | 2.3 (-1.7, 6.4)             | 0.261   |
| <i>P-Value for Interaction Term<sup>d</sup></i>   | -                       | -                           | 0.480   | -                      | -                           | 0.529   |
| <b>BASC-2 Attention Problems Subscale T-Score</b> |                         |                             |         |                        |                             |         |
| Age 2                                             | 265                     | 1.1 (-1.8, 4.0)             | 0.455   | 256                    | 0.8 (-2.8, 4.4)             | 0.656   |
| Age 3                                             | 260                     | 2.6 (-0.6, 5.7)             | 0.107   | 245                    | 2.1 (-2.0, 6.2)             | 0.308   |
| Age 4.5                                           | 232                     | 2.9 (-0.4, 6.2)             | 0.081   | 218                    | 2.3 (-1.8, 6.3)             | 0.272   |
| <i>P-Value for Interaction Term<sup>d</sup></i>   | -                       | -                           | 0.544   | -                      | -                           | 0.669   |
| <b>BASC-2 Adaptability Subscale T-Score</b>       |                         |                             |         |                        |                             |         |
| Age 2                                             | 265                     | -2.4 (-5.5, 0.6)            | 0.116   | 256                    | -1.5 (-5.1, 2.0)            | 0.396   |
| Age 3                                             | 260                     | -4.6 (-8.0, -1.1)           | 0.009   | 245                    | -3.3 (-7.3, 0.7)            | 0.102   |
| Age 4.5                                           | 232                     | -3.6 (-7.5, 0.3)            | 0.068   | 218                    | -2.7 (-7.3, 1.9)            | 0.255   |
| <i>P-Value for Interaction Term<sup>d</sup></i>   | -                       | -                           | 0.534   | -                      | -                           | 0.670   |
| <b>BASC-2 Social Skills Subscale T-Score</b>      |                         |                             |         |                        |                             |         |
| Age 2                                             | 265                     | -2.5 (-5.4, 0.4)            | 0.094   | 256                    | -2.3 (-6.2, 1.5)            | 0.238   |
| Age 3                                             | 260                     | -3.9 (-7.0, -0.8)           | 0.014   | 245                    | -3.9 (-8.0, 0.1)            | 0.057   |
| Age 4.5                                           | 232                     | -4.8 (-8.7, -1.0)           | 0.014   | 218                    | -5.1 (-9.9, -0.3)           | 0.038   |
| <i>P-Value for Interaction Term<sup>d</sup></i>   | -                       | -                           | 0.458   | -                      | -                           | 0.377   |

| Child's Age | Unadjusted <sup>b</sup> |                             |         | Adjusted <sup>bc</sup> |                             |         |
|-------------|-------------------------|-----------------------------|---------|------------------------|-----------------------------|---------|
|             | N                       | Parameter Estimate (95% CI) | P-Value | N                      | Parameter Estimate (95% CI) | P-Value |

N = children of WWE with non-missing behavior score and mothers with max observed ratio ASM Concentration in 3rd

trimester (includes day of delivery). Children with missing covariates excluded from adjusted model.

<sup>a</sup> Ratio ASM Concentration calculated as ratio upper limit for therapeutic range. For mothers on polytherapy, ratio ASM concentration calculated by summing the ratio ASM concentration for each ASM.

Maximum observed value recorded during 3rd trimester, including day of delivery.

<sup>b</sup> Parameter Estimate and P-Value from a longitudinal generalized linear model with identity link function and generalized estimating equations and unstructured covariance structure including mother's max observed ratio ASM concentration in 3rd trimester, child's age, and their interaction.

<sup>c</sup> Adjusted for mother's IQ, education level, age at enrollment, ASM group (Monotherapy/Polytherapy), smoking during pregnancy, post-birth average BAI score through child's 2YO visit, McMaster FAD problematic family functioning at child's 2YO Visit, and child's sex and small for gestational age status.

<sup>d</sup> P-value for the interaction between max observed ratio ASM concentration in 3rd trimester and child's age calculated using the Score test. If significant, the association between max observed ratio ASM concentration in 3rd trimester and behavior score differs among child's age.

**eTable 21.** Association Between Continuous Behavior Scores and Maximum Ratio DDD<sup>a</sup> in 3rd Trimester by Child's Age, Children of WWE on ASM in 3rd Trimester, Completers Population

| Child's Age                                             | Unadjusted <sup>b</sup> |                             |         | Adjusted <sup>bc</sup> |                             |         |
|---------------------------------------------------------|-------------------------|-----------------------------|---------|------------------------|-----------------------------|---------|
|                                                         | N                       | Parameter Estimate (95% CI) | P-Value | N                      | Parameter Estimate (95% CI) | P-Value |
| <b>ABAS-3 General Adaptive Composite Standard Score</b> |                         |                             |         |                        |                             |         |
| Age 3                                                   | 278                     | -1.8 (-2.6, -1.0)           | <.001   | 260                    | -1.7 (-2.8, -0.6)           | 0.002   |
| Age 4.5                                                 | 239                     | -1.8 (-2.5, -1.1)           | <.001   | 226                    | -1.7 (-2.7, -0.7)           | 0.001   |
| <i>P-Value for Interaction Term<sup>d</sup></i>         | -                       | -                           | >.999   | -                      | -                           | 0.929   |
| <b>ABAS-3 Conceptual Composite Standard Score</b>       |                         |                             |         |                        |                             |         |
| Age 3                                                   | 279                     | -2.2 (-3.1, -1.3)           | <.001   | 261                    | -1.7 (-2.8, -0.5)           | 0.004   |
| Age 4.5                                                 | 239                     | -1.7 (-2.5, -0.9)           | <.001   | 226                    | -1.2 (-2.3, -0.2)           | 0.021   |
| <i>P-Value for Interaction Term<sup>d</sup></i>         | -                       | -                           | 0.230   | -                      | -                           | 0.253   |
| <b>ABAS-3 Social Composite Standard Score</b>           |                         |                             |         |                        |                             |         |
| Age 3                                                   | 278                     | -1.8 (-2.8, -0.8)           | <.001   | 260                    | -1.6 (-2.8, -0.4)           | 0.011   |
| Age 4.5                                                 | 242                     | -2.0 (-2.7, -1.2)           | <.001   | 228                    | -1.7 (-2.7, -0.8)           | <.001   |
| <i>P-Value for Interaction Term<sup>d</sup></i>         | -                       | -                           | 0.745   | -                      | -                           | 0.730   |
| <b>ABAS-3 Practical Composite Standard Score</b>        |                         |                             |         |                        |                             |         |
| Age 3                                                   | 279                     | -1.4 (-2.3, -0.6)           | <.001   | 261                    | -1.6 (-2.6, -0.5)           | 0.004   |
| Age 4.5                                                 | 241                     | -1.4 (-2.3, -0.5)           | 0.002   | 227                    | -1.5 (-2.7, -0.3)           | 0.018   |
| <i>P-Value for Interaction Term<sup>d</sup></i>         | -                       | -                           | 0.940   | -                      | -                           | 0.879   |
| <b>BASC-2 Hyperactivity Subscale T-Score</b>            |                         |                             |         |                        |                             |         |
| Age 2                                                   | 282                     | 1.2 (0.4, 2.1)              | 0.005   | 272                    | 1.1 (0.2, 2.1)              | 0.022   |
| Age 3                                                   | 277                     | 1.1 (0.3, 1.8)              | 0.006   | 260                    | 0.9 (0.1, 1.8)              | 0.037   |
| Age 4.5                                                 | 242                     | 1.1 (0.2, 2.1)              | 0.018   | 227                    | 0.9 (-0.1, 1.9)             | 0.084   |
| <i>P-Value for Interaction Term<sup>d</sup></i>         | -                       | -                           | 0.870   | -                      | -                           | 0.809   |
| <b>BASC-2 Aggression Subscale T-Score</b>               |                         |                             |         |                        |                             |         |

| Child's Age                                     | Unadjusted <sup>b</sup> |                             |         | Adjusted <sup>bc</sup> |                             |         |
|-------------------------------------------------|-------------------------|-----------------------------|---------|------------------------|-----------------------------|---------|
|                                                 | N                       | Parameter Estimate (95% CI) | P-Value | N                      | Parameter Estimate (95% CI) | P-Value |
| Age 2                                           | 282                     | 0.7 (-0.1, 1.5)             | 0.076   | 272                    | 0.6 (-0.3, 1.5)             | 0.166   |
| Age 3                                           | 277                     | 0.8 (0.0, 1.6)              | 0.061   | 260                    | 0.7 (-0.2, 1.5)             | 0.133   |
| Age 4.5                                         | 242                     | 0.4 (-0.1, 0.9)             | 0.101   | 227                    | 0.2 (-0.4, 0.8)             | 0.460   |
| <i>P-Value for Interaction Term<sup>d</sup></i> | -                       | -                           | 0.604   | -                      | -                           | 0.486   |
| <b>BASC-2 Anxiety Subscale T-Score</b>          |                         |                             |         |                        |                             |         |
| Age 2                                           | 280                     | -0.1 (-0.8, 0.5)            | 0.704   | 270                    | -0.2 (-1.0, 0.6)            | 0.674   |
| Age 3                                           | 276                     | -0.2 (-0.9, 0.5)            | 0.602   | 259                    | -0.3 (-1.1, 0.5)            | 0.469   |
| Age 4.5                                         | 242                     | -0.4 (-1.1, 0.3)            | 0.291   | 227                    | -0.4 (-1.4, 0.5)            | 0.329   |
| <i>P-Value for Interaction Term<sup>d</sup></i> | -                       | -                           | 0.846   | -                      | -                           | 0.854   |
| <b>BASC-2 Depression Subscale T-Score</b>       |                         |                             |         |                        |                             |         |
| Age 2                                           | 282                     | 0.8 (0.1, 1.6)              | 0.037   | 272                    | 0.9 (-0.1, 1.8)             | 0.070   |
| Age 3                                           | 277                     | 0.6 (-0.2, 1.3)             | 0.128   | 260                    | 0.6 (-0.3, 1.4)             | 0.197   |
| Age 4.5                                         | 242                     | 0.7 (0.1, 1.3)              | 0.030   | 227                    | 0.7 (-0.1, 1.4)             | 0.072   |
| <i>P-Value for Interaction Term<sup>d</sup></i> | -                       | -                           | 0.652   | -                      | -                           | 0.592   |
| <b>BASC-2 Somatization Subscale T-Score</b>     |                         |                             |         |                        |                             |         |
| Age 2                                           | 282                     | 0.0 (-0.6, 0.5)             | 0.905   | 272                    | -0.1 (-0.7, 0.5)            | 0.785   |
| Age 3                                           | 277                     | 0.1 (-0.5, 0.7)             | 0.746   | 260                    | 0.0 (-0.7, 0.7)             | 0.934   |
| Age 4.5                                         | 242                     | -0.3 (-0.9, 0.3)            | 0.390   | 227                    | -0.4 (-1.1, 0.3)            | 0.300   |
| <i>P-Value for Interaction Term<sup>d</sup></i> | -                       | -                           | 0.687   | -                      | -                           | 0.662   |
| <b>BASC-2 Atypicality Subscale T-Score</b>      |                         |                             |         |                        |                             |         |
| Age 2                                           | 281                     | 0.8 (0.1, 1.5)              | 0.022   | 271                    | 0.6 (-0.1, 1.4)             | 0.114   |
| Age 3                                           | 277                     | 0.6 (-0.1, 1.3)             | 0.101   | 260                    | 0.3 (-0.5, 1.1)             | 0.422   |
| Age 4.5                                         | 242                     | 0.5 (-0.2, 1.1)             | 0.154   | 227                    | 0.1 (-0.6, 0.9)             | 0.742   |
| <i>P-Value for Interaction Term<sup>d</sup></i> | -                       | -                           | 0.718   | -                      | -                           | 0.515   |

| Child's Age                                       | Unadjusted <sup>b</sup> |                             |         | Adjusted <sup>bc</sup> |                             |         |
|---------------------------------------------------|-------------------------|-----------------------------|---------|------------------------|-----------------------------|---------|
|                                                   | N                       | Parameter Estimate (95% CI) | P-Value | N                      | Parameter Estimate (95% CI) | P-Value |
| <b>BASC-2 Withdrawal Subscale T-Score</b>         |                         |                             |         |                        |                             |         |
| Age 2                                             | 281                     | -0.4 (-1.0, 0.3)            | 0.257   | 271                    | -0.3 (-1.0, 0.5)            | 0.498   |
| Age 3                                             | 276                     | 0.4 (-0.5, 1.2)             | 0.413   | 259                    | 0.4 (-0.5, 1.4)             | 0.363   |
| Age 4.5                                           | 242                     | 0.4 (-0.3, 1.1)             | 0.271   | 227                    | 0.4 (-0.4, 1.2)             | 0.297   |
| <i>P-Value for Interaction Term<sup>d</sup></i>   | -                       | -                           | 0.208   | -                      | -                           | 0.256   |
| <b>BASC-2 Attention Problems Subscale T-Score</b> |                         |                             |         |                        |                             |         |
| Age 2                                             | 282                     | 0.6 (-0.1, 1.3)             | 0.100   | 272                    | 0.4 (-0.4, 1.3)             | 0.318   |
| Age 3                                             | 277                     | 0.8 (0.1, 1.4)              | 0.023   | 260                    | 0.6 (-0.2, 1.4)             | 0.153   |
| Age 4.5                                           | 242                     | 0.8 (0.0, 1.6)              | 0.038   | 227                    | 0.6 (-0.2, 1.4)             | 0.168   |
| <i>P-Value for Interaction Term<sup>d</sup></i>   | -                       | -                           | 0.864   | -                      | -                           | 0.922   |
| <b>BASC-2 Adaptability Subscale T-Score</b>       |                         |                             |         |                        |                             |         |
| Age 2                                             | 282                     | -0.4 (-1.1, 0.3)            | 0.236   | 272                    | 0.0 (-0.8, 0.8)             | 0.916   |
| Age 3                                             | 277                     | -0.6 (-1.4, 0.2)            | 0.150   | 260                    | -0.2 (-1.2, 0.7)            | 0.664   |
| Age 4.5                                           | 242                     | -0.2 (-0.9, 0.5)            | 0.527   | 227                    | 0.1 (-0.7, 1.0)             | 0.730   |
| <i>P-Value for Interaction Term<sup>d</sup></i>   | -                       | -                           | 0.558   | -                      | -                           | 0.615   |
| <b>BASC-2 Social Skills Subscale T-Score</b>      |                         |                             |         |                        |                             |         |
| Age 2                                             | 282                     | -0.8 (-1.4, -0.3)           | 0.002   | 272                    | -0.7 (-1.4, 0.0)            | 0.042   |
| Age 3                                             | 277                     | -1.2 (-1.9, -0.6)           | <.001   | 260                    | -1.1 (-2.0, -0.3)           | 0.008   |
| Age 4.5                                           | 242                     | -1.2 (-2.1, -0.3)           | 0.008   | 227                    | -1.1 (-2.1, -0.1)           | 0.037   |
| <i>P-Value for Interaction Term<sup>d</sup></i>   | -                       | -                           | 0.502   | -                      | -                           | 0.449   |

| Child's Age | Unadjusted <sup>b</sup> |                             |         | Adjusted <sup>bc</sup> |                             |         |
|-------------|-------------------------|-----------------------------|---------|------------------------|-----------------------------|---------|
|             | N                       | Parameter Estimate (95% CI) | P-Value | N                      | Parameter Estimate (95% CI) | P-Value |

N = children of WWE on ASM in 3rd trimester with non-missing behavior score. Children with missing covariates excluded from adjusted model.

<sup>a</sup> Ratio DDD = Ratio Defined Daily Dose, calculated by dividing the mother's ASM total prescribed daily dose by the WHO defined daily dose values. For mothers on polytherapy, ratio DDD equals the sum across the ratio DDD for all ASMs. Maximum ratio DDD during 3rd trimester used for analysis.

<sup>b</sup> Parameter Estimate and P-Value from a longitudinal generalized linear model with identity link function and generalized estimating equations and unstructured covariance structure including mother's max ratio DDD in 3rd trimester, child's age, and their interaction.

<sup>c</sup> Adjusted for mother's IQ, education level, age at enrollment, ASM group (Monotherapy/Polytherapy), smoking during pregnancy, post-birth average BAI score through child's 2YO visit, McMaster FAD problematic family functioning at child's 2YO Visit, and child's sex and small for gestational age status.

<sup>d</sup> P-value for the interaction between max ratio DDD in 3rd trimester and child's age calculated using the Score test. If significant, the association between max ratio DDD in 3rd trimester and behavior score differs among child's age.



**eTable 22.** Association Between Continuous Behavior Scores and Maximum Observed Ratio ASM Concentration <sup>a</sup> in 3rd Trimester by ASM Category and Child's Age, Children of WVE with 3rd Trimester Blood Levels, Completers Population

|                                                         |                                         | Unadjusted <sup>b</sup> |                             |         | Adjusted <sup>bc</sup> |                             |         |
|---------------------------------------------------------|-----------------------------------------|-------------------------|-----------------------------|---------|------------------------|-----------------------------|---------|
| Child's Age                                             | 3rd Trimester ASM Category <sup>d</sup> | N                       | Parameter Estimate (95% CI) | P-Value | N                      | Parameter Estimate (95% CI) | P-Value |
| <b>ABAS-3 General Adaptive Composite Standard Score</b> |                                         |                         |                             |         |                        |                             |         |
| Age 3                                                   | Lamotrigine                             | 93                      | -3.0 (-16.2, 10.1)          | 0.651   | 88                     | -3.9 (-15.1, 7.2)           | 0.488   |
|                                                         | Levetiracetam                           | 75                      | -5.0 (-16.4, 6.3)           | 0.386   | 68                     | -7.9 (-18.8, 3.0)           | 0.156   |
|                                                         | Other Monotherapy                       | 42                      | -7.6 (-30.8, 15.7)          | 0.525   | 39                     | -3.4 (-21.9, 15.1)          | 0.720   |
|                                                         | Lamotrigine+ Levetiracetam              | 24                      | -2.3 (-12.0, 7.3)           | 0.636   | 23                     | 0.1 (-11.1, 11.3)           | 0.986   |
|                                                         | Other Polytherapy                       | 27                      | 0.6 (-12.4, 13.7)           | 0.927   | 27                     | 0.8 (-15.0, 16.6)           | 0.922   |
| Age 4.5                                                 | Lamotrigine                             | 79                      | -9.0 (-20.5, 2.5)           | 0.126   | 77                     | -10.8 (-20.5, -1.2)         | 0.028   |
|                                                         | Levetiracetam                           | 70                      | -16.2 (-26.7, -5.8)         | 0.002   | 63                     | -19.4 (-29.0, -9.9)         | <.001   |
|                                                         | Other Monotherapy                       | 31                      | 9.5 (-17.7, 36.7)           | 0.493   | 30                     | 12.5 (-5.8, 30.9)           | 0.181   |
|                                                         | Lamotrigine+ Levetiracetam              | 24                      | -3.5 (-11.9, 4.8)           | 0.407   | 22                     | -0.5 (-7.1, 6.1)            | 0.884   |
|                                                         | Other Polytherapy                       | 25                      | -11.3 (-29.9, 7.3)          | 0.234   | 25                     | -10.9 (-31.3, 9.5)          | 0.293   |
| <i>P-Value for Interaction Term<sup>e</sup></i>         |                                         | -                       | -                           | 0.019   | -                      | -                           | 0.020   |
| <b>ABAS-3 Conceptual Composite Standard Score</b>       |                                         |                         |                             |         |                        |                             |         |
| Age 3                                                   | Lamotrigine                             | 93                      | 4.2 (-8.2, 16.6)            | 0.504   | 88                     | 2.2 (-8.3, 12.6)            | 0.681   |
|                                                         | Levetiracetam                           | 76                      | -8.2 (-22.4, 6.1)           | 0.261   | 69                     | -10.4 (-23.1, 2.3)          | 0.108   |
|                                                         | Other Monotherapy                       | 42                      | -8.3 (-33.1, 16.5)          | 0.512   | 39                     | -6.1 (-25.0, 12.8)          | 0.529   |
|                                                         | Lamotrigine+ Levetiracetam              | 24                      | 1.8 (-8.2, 11.9)            | 0.720   | 23                     | 3.9 (-6.4, 14.1)            | 0.458   |
|                                                         | Other Polytherapy                       | 27                      | 4.3 (-9.9, 18.5)            | 0.553   | 27                     | 4.2 (-11.5, 19.8)           | 0.602   |
| Age 4.5                                                 | Lamotrigine                             | 79                      | -5.0 (-16.3, 6.3)           | 0.387   | 77                     | -8.1 (-17.9, 1.6)           | 0.102   |
|                                                         | Levetiracetam                           | 70                      | -14.6 (-27.5, -1.8)         | 0.025   | 63                     | -17.2 (-28.8, -5.6)         | 0.004   |
|                                                         | Other Monotherapy                       | 31                      | 15.3 (-9.0, 39.7)           | 0.217   | 30                     | 16.7 (2.3, 31.2)            | 0.023   |

|                                                  |                                         | Unadjusted <sup>b</sup> |                             |         | Adjusted <sup>bc</sup> |                             |         |
|--------------------------------------------------|-----------------------------------------|-------------------------|-----------------------------|---------|------------------------|-----------------------------|---------|
| Child's Age                                      | 3rd Trimester ASM Category <sup>d</sup> | N                       | Parameter Estimate (95% CI) | P-Value | N                      | Parameter Estimate (95% CI) | P-Value |
|                                                  | Lamotrigine+ Levetiracetam              | 24                      | -0.9 (-9.5, 7.7)            | 0.836   | 22                     | 1.9 (-5.3, 9.1)             | 0.604   |
|                                                  | Other Polytherapy                       | 25                      | -8.0 (-25.0, 9.0)           | 0.355   | 25                     | -8.0 (-25.8, 9.9)           | 0.382   |
| <i>P-Value for Interaction Term<sup>e</sup></i>  |                                         | -                       | -                           | 0.032   | -                      | -                           | 0.036   |
| <b>ABAS-3 Social Composite Standard Score</b>    |                                         |                         |                             |         |                        |                             |         |
| Age 3                                            | Lamotrigine                             | 93                      | -3.2 (-16.5, 10.1)          | 0.634   | 88                     | -3.7 (-15.1, 7.7)           | 0.527   |
|                                                  | Levetiracetam                           | 75                      | -5.1 (-16.2, 5.9)           | 0.362   | 68                     | -8.2 (-18.7, 2.4)           | 0.130   |
|                                                  | Other Monotherapy                       | 42                      | -5.4 (-27.3, 16.5)          | 0.630   | 39                     | -0.5 (-18.4, 17.3)          | 0.952   |
|                                                  | Lamotrigine+ Levetiracetam              | 24                      | 0.1 (-13.3, 13.5)           | 0.991   | 23                     | -1.3 (-17.1, 14.5)          | 0.871   |
|                                                  | Other Polytherapy                       | 27                      | -0.2 (-13.4, 13.0)          | 0.978   | 27                     | 0.0 (-15.2, 15.3)           | 0.997   |
| Age 4.5                                          | Lamotrigine                             | 81                      | -7.8 (-18.3, 2.7)           | 0.145   | 79                     | -9.6 (-19.2, 0.1)           | 0.051   |
|                                                  | Levetiracetam                           | 70                      | -14.6 (-24.4, -4.8)         | 0.004   | 63                     | -17.7 (-26.4, -9.0)         | <.001   |
|                                                  | Other Monotherapy                       | 32                      | -2.0 (-24.9, 21.0)          | 0.866   | 30                     | 1.9 (-14.3, 18.1)           | 0.814   |
|                                                  | Lamotrigine+ Levetiracetam              | 24                      | 1.8 (-3.8, 7.3)             | 0.537   | 22                     | 0.2 (-6.5, 7.0)             | 0.947   |
|                                                  | Other Polytherapy                       | 25                      | -11.5 (-26.6, 3.5)          | 0.134   | 25                     | -11.1 (-27.2, 4.9)          | 0.174   |
| <i>P-Value for Interaction Term<sup>e</sup></i>  |                                         | -                       | -                           | 0.339   | -                      | -                           | 0.410   |
| <b>ABAS-3 Practical Composite Standard Score</b> |                                         |                         |                             |         |                        |                             |         |
| Age 3                                            | Lamotrigine                             | 93                      | -5.2 (-18.4, 8.0)           | 0.438   | 88                     | -5.5 (-16.5, 5.6)           | 0.332   |
|                                                  | Levetiracetam                           | 76                      | -5.2 (-15.5, 5.0)           | 0.318   | 69                     | -7.9 (-18.3, 2.5)           | 0.139   |
|                                                  | Other Monotherapy                       | 42                      | -2.8 (-26.9, 21.4)          | 0.822   | 39                     | 1.3 (-17.9, 20.5)           | 0.891   |
|                                                  | Lamotrigine+ Levetiracetam              | 24                      | -6.6 (-15.4, 2.1)           | 0.138   | 23                     | -3.1 (-14.1, 8.0)           | 0.588   |
|                                                  | Other Polytherapy                       | 27                      | -3.9 (-16.7, 8.9)           | 0.552   | 27                     | -3.0 (-18.9, 13.0)          | 0.716   |
| Age 4.5                                          | Lamotrigine                             | 80                      | -13.0 (-24.8, -1.2)         | 0.031   | 78                     | -14.1 (-24.3, -4.0)         | 0.006   |

|                                                 |                                         | Unadjusted <sup>b</sup> |                             |         | Adjusted <sup>bc</sup> |                             |         |
|-------------------------------------------------|-----------------------------------------|-------------------------|-----------------------------|---------|------------------------|-----------------------------|---------|
| Child's Age                                     | 3rd Trimester ASM Category <sup>d</sup> | N                       | Parameter Estimate (95% CI) | P-Value | N                      | Parameter Estimate (95% CI) | P-Value |
|                                                 | Levetiracetam                           | 70                      | -16.3 (-25.3, -7.3)         | <.001   | 63                     | -18.8 (-27.5, -10.2)        | <.001   |
|                                                 | Other Monotherapy                       | 32                      | 8.5 (-18.7, 35.7)           | 0.539   | 30                     | 12.6 (-6.7, 32.0)           | 0.200   |
|                                                 | Lamotrigine+ Levetiracetam              | 24                      | -6.8 (-16.0, 2.4)           | 0.147   | 22                     | -2.7 (-11.8, 6.4)           | 0.555   |
|                                                 | Other Polytherapy                       | 25                      | -10.0 (-28.9, 9.0)          | 0.303   | 25                     | -8.9 (-30.1, 12.2)          | 0.408   |
| <i>P-Value for Interaction Term<sup>e</sup></i> |                                         | -                       | -                           | 0.022   | -                      | -                           | 0.017   |
| <b>BASC-2 Hyperactivity Subscale T-Score</b>    |                                         |                         |                             |         |                        |                             |         |
| Age 2                                           | Lamotrigine                             | 96                      | 6.3 (-2.2, 14.9)            | 0.147   | 94                     | 6.2 (-1.8, 14.3)            | 0.131   |
|                                                 | Levetiracetam                           | 71                      | 3.3 (-4.0, 10.6)            | 0.375   | 68                     | 4.1 (-3.0, 11.2)            | 0.255   |
|                                                 | Other Monotherapy                       | 44                      | 4.0 (-6.4, 14.5)            | 0.447   | 41                     | 5.1 (-3.8, 14.0)            | 0.263   |
|                                                 | Lamotrigine+ Levetiracetam              | 27                      | 3.1 (-4.7, 10.9)            | 0.439   | 26                     | 0.7 (-6.6, 8.1)             | 0.845   |
|                                                 | Other Polytherapy                       | 27                      | -4.5 (-11.1, 2.1)           | 0.184   | 27                     | -4.3 (-12.3, 3.7)           | 0.295   |
| Age 3                                           | Lamotrigine                             | 94                      | 5.0 (-3.8, 13.8)            | 0.264   | 89                     | 4.8 (-3.7, 13.2)            | 0.270   |
|                                                 | Levetiracetam                           | 74                      | 0.9 (-4.8, 6.7)             | 0.749   | 68                     | 2.3 (-3.0, 7.7)             | 0.391   |
|                                                 | Other Monotherapy                       | 41                      | 7.8 (-9.3, 24.9)            | 0.371   | 38                     | 8.9 (-6.9, 24.6)            | 0.270   |
|                                                 | Lamotrigine+ Levetiracetam              | 24                      | 4.5 (-5.8, 14.7)            | 0.393   | 23                     | -0.4 (-12.7, 12.0)          | 0.951   |
|                                                 | Other Polytherapy                       | 27                      | -3.2 (-12.3, 5.9)           | 0.494   | 27                     | -2.9 (-12.0, 6.2)           | 0.529   |
| Age 4.5                                         | Lamotrigine                             | 79                      | 7.4 (-1.9, 16.8)            | 0.117   | 77                     | 7.4 (-1.6, 16.4)            | 0.107   |
|                                                 | Levetiracetam                           | 71                      | 12.3 (4.0, 20.5)            | 0.004   | 64                     | 13.4 (4.9, 21.8)            | 0.002   |
|                                                 | Other Monotherapy                       | 33                      | -1.5 (-20.7, 17.7)          | 0.878   | 30                     | -0.7 (-16.7, 15.4)          | 0.933   |
|                                                 | Lamotrigine+ Levetiracetam              | 24                      | 4.4 (-5.8, 14.7)            | 0.396   | 22                     | -0.7 (-12.3, 10.8)          | 0.902   |
|                                                 | Other Polytherapy                       | 25                      | 0.2 (-13.8, 14.2)           | 0.982   | 25                     | 0.5 (-15.5, 16.5)           | 0.954   |
| <i>P-Value for Interaction Term<sup>e</sup></i> |                                         | -                       | -                           | 0.318   | -                      | -                           | 0.330   |

|                                                 |                                         | Unadjusted <sup>b</sup> |                             |         | Adjusted <sup>bc</sup> |                             |         |
|-------------------------------------------------|-----------------------------------------|-------------------------|-----------------------------|---------|------------------------|-----------------------------|---------|
| Child's Age                                     | 3rd Trimester ASM Category <sup>d</sup> | N                       | Parameter Estimate (95% CI) | P-Value | N                      | Parameter Estimate (95% CI) | P-Value |
| <b>BASC-2 Aggression Subscale T-Score</b>       |                                         |                         |                             |         |                        |                             |         |
| Age 2                                           | Lamotrigine                             | 96                      | 9.8 (3.0, 16.7)             | 0.005   | 94                     | 9.6 (2.8, 16.4)             | 0.006   |
|                                                 | Levetiracetam                           | 71                      | -1.5 (-5.1, 2.0)            | 0.397   | 68                     | -1.5 (-5.2, 2.2)            | 0.420   |
|                                                 | Other Monotherapy                       | 44                      | 5.0 (-9.6, 19.5)            | 0.503   | 41                     | 6.3 (-6.6, 19.3)            | 0.337   |
|                                                 | Lamotrigine+ Levetiracetam              | 27                      | -0.1 (-6.8, 6.5)            | 0.974   | 26                     | -0.1 (-8.5, 8.2)            | 0.976   |
|                                                 | Other Polytherapy                       | 27                      | -4.2 (-10.7, 2.3)           | 0.210   | 27                     | -4.3 (-10.7, 2.0)           | 0.182   |
| Age 3                                           | Lamotrigine                             | 94                      | 8.0 (1.1, 14.9)             | 0.023   | 89                     | 7.7 (0.3, 15.1)             | 0.040   |
|                                                 | Levetiracetam                           | 74                      | 4.8 (0.5, 9.1)              | 0.029   | 68                     | 5.2 (0.9, 9.4)              | 0.017   |
|                                                 | Other Monotherapy                       | 41                      | 4.9 (-13.9, 23.8)           | 0.608   | 38                     | 6.9 (-11.0, 24.9)           | 0.449   |
|                                                 | Lamotrigine+ Levetiracetam              | 24                      | 4.5 (-1.8, 10.8)            | 0.161   | 23                     | 3.7 (-4.1, 11.4)            | 0.353   |
|                                                 | Other Polytherapy                       | 27                      | -2.9 (-10.4, 4.6)           | 0.452   | 27                     | -3.0 (-9.7, 3.7)            | 0.378   |
| Age 4.5                                         | Lamotrigine                             | 79                      | 4.2 (-2.0, 10.5)            | 0.183   | 77                     | 3.4 (-2.5, 9.3)             | 0.258   |
|                                                 | Levetiracetam                           | 71                      | 6.6 (-0.3, 13.4)            | 0.059   | 64                     | 7.3 (0.1, 14.5)             | 0.048   |
|                                                 | Other Monotherapy                       | 33                      | 4.9 (-11.0, 20.8)           | 0.548   | 30                     | 5.8 (-8.1, 19.8)            | 0.414   |
|                                                 | Lamotrigine+ Levetiracetam              | 24                      | -4.2 (-11.2, 2.7)           | 0.231   | 22                     | -4.8 (-13.7, 4.0)           | 0.285   |
|                                                 | Other Polytherapy                       | 25                      | 2.6 (-4.8, 10.0)            | 0.489   | 25                     | 2.4 (-6.0, 10.9)            | 0.571   |
| <i>P-Value for Interaction Term<sup>e</sup></i> |                                         | -                       | -                           | 0.069   | -                      | -                           | 0.062   |
| <b>BASC-2 Anxiety Subscale T-Score</b>          |                                         |                         |                             |         |                        |                             |         |
| Age 2                                           | Lamotrigine                             | 94                      | -2.9 (-9.5, 3.7)            | 0.391   | 92                     | -2.0 (-8.9, 4.9)            | 0.572   |
|                                                 | Levetiracetam                           | 71                      | -7.2 (-12.4, -2.0)          | 0.006   | 68                     | -7.4 (-12.6, -2.1)          | 0.006   |
|                                                 | Other Monotherapy                       | 44                      | -0.3 (-10.9, 10.4)          | 0.960   | 41                     | 2.6 (-6.6, 11.8)            | 0.578   |
|                                                 | Lamotrigine+ Levetiracetam              | 27                      | 1.8 (-8.2, 11.8)            | 0.729   | 26                     | -0.8 (-11.4, 9.7)           | 0.878   |

|                                                 |                                         | Unadjusted <sup>b</sup> |                             |         | Adjusted <sup>bc</sup> |                             |         |
|-------------------------------------------------|-----------------------------------------|-------------------------|-----------------------------|---------|------------------------|-----------------------------|---------|
| Child's Age                                     | 3rd Trimester ASM Category <sup>d</sup> | N                       | Parameter Estimate (95% CI) | P-Value | N                      | Parameter Estimate (95% CI) | P-Value |
|                                                 | Other Polytherapy                       | 27                      | -5.9 (-12.6, 0.7)           | 0.080   | 27                     | -4.3 (-10.9, 2.3)           | 0.204   |
| Age 3                                           | Lamotrigine                             | 94                      | -0.9 (-11.3, 9.5)           | 0.867   | 89                     | 0.2 (-10.6, 11.0)           | 0.972   |
|                                                 | Levetiracetam                           | 73                      | -4.7 (-11.5, 2.1)           | 0.172   | 67                     | -4.7 (-11.8, 2.3)           | 0.189   |
|                                                 | Other Monotherapy                       | 41                      | 4.3 (-8.5, 17.2)            | 0.510   | 38                     | 8.3 (-3.5, 20.1)            | 0.170   |
|                                                 | Lamotrigine+ Levetiracetam              | 24                      | 3.1 (-8.0, 14.1)            | 0.587   | 23                     | -0.4 (-10.8, 10.0)          | 0.935   |
|                                                 | Other Polytherapy                       | 27                      | 1.9 (-9.7, 13.4)            | 0.748   | 27                     | 3.6 (-7.2, 14.4)            | 0.514   |
| Age 4.5                                         | Lamotrigine                             | 79                      | -2.4 (-12.3, 7.6)           | 0.641   | 77                     | -1.7 (-11.7, 8.2)           | 0.732   |
|                                                 | Levetiracetam                           | 71                      | -1.9 (-8.8, 5.1)            | 0.600   | 64                     | -1.7 (-9.2, 5.7)            | 0.651   |
|                                                 | Other Monotherapy                       | 33                      | 0.2 (-17.7, 18.1)           | 0.984   | 30                     | 4.7 (-10.4, 19.8)           | 0.542   |
|                                                 | Lamotrigine+ Levetiracetam              | 24                      | 4.7 (-2.0, 11.3)            | 0.167   | 22                     | 3.1 (-5.2, 11.4)            | 0.465   |
|                                                 | Other Polytherapy                       | 25                      | 9.5 (1.1, 17.9)             | 0.026   | 25                     | 11.2 (3.3, 19.1)            | 0.006   |
| <i>P-Value for Interaction Term<sup>e</sup></i> |                                         | -                       | -                           | 0.644   | -                      | -                           | 0.629   |
| <b>BASC-2 Depression Subscale T-Score</b>       |                                         |                         |                             |         |                        |                             |         |
| Age 2                                           | Lamotrigine                             | 96                      | 6.0 (-3.6, 15.6)            | 0.219   | 94                     | 6.2 (-2.5, 14.9)            | 0.162   |
|                                                 | Levetiracetam                           | 71                      | -1.7 (-6.9, 3.6)            | 0.536   | 68                     | -1.9 (-7.7, 3.8)            | 0.505   |
|                                                 | Other Monotherapy                       | 44                      | 5.4 (-10.4, 21.2)           | 0.504   | 41                     | 5.8 (-8.1, 19.7)            | 0.414   |
|                                                 | Lamotrigine+ Levetiracetam              | 27                      | 1.5 (-4.3, 7.3)             | 0.614   | 26                     | 0.6 (-6.8, 8.0)             | 0.871   |
|                                                 | Other Polytherapy                       | 27                      | -1.7 (-9.2, 5.7)            | 0.648   | 27                     | -2.1 (-10.1, 5.8)           | 0.600   |
| Age 3                                           | Lamotrigine                             | 94                      | 3.3 (-6.6, 13.2)            | 0.512   | 89                     | 3.5 (-6.2, 13.3)            | 0.475   |
|                                                 | Levetiracetam                           | 74                      | 0.9 (-6.5, 8.2)             | 0.820   | 68                     | 0.8 (-6.6, 8.3)             | 0.825   |
|                                                 | Other Monotherapy                       | 41                      | 3.8 (-14.5, 22.1)           | 0.684   | 38                     | 5.6 (-11.0, 22.2)           | 0.512   |
|                                                 | Lamotrigine+ Levetiracetam              | 24                      | 5.2 (-1.9, 12.3)            | 0.152   | 23                     | 3.3 (-5.5, 12.1)            | 0.463   |

|                                                 |                                         | Unadjusted <sup>b</sup> |                             |         | Adjusted <sup>bc</sup> |                             |         |
|-------------------------------------------------|-----------------------------------------|-------------------------|-----------------------------|---------|------------------------|-----------------------------|---------|
| Child's Age                                     | 3rd Trimester ASM Category <sup>d</sup> | N                       | Parameter Estimate (95% CI) | P-Value | N                      | Parameter Estimate (95% CI) | P-Value |
|                                                 | Other Polytherapy                       | 27                      | -5.5 (-13.4, 2.4)           | 0.172   | 27                     | -5.8 (-13.3, 1.6)           | 0.125   |
| Age 4.5                                         | Lamotrigine                             | 79                      | 8.6 (-1.6, 18.8)            | 0.097   | 77                     | 8.4 (-1.1, 17.9)            | 0.084   |
|                                                 | Levetiracetam                           | 71                      | 3.2 (-3.9, 10.3)            | 0.375   | 64                     | 3.4 (-3.8, 10.6)            | 0.353   |
|                                                 | Other Monotherapy                       | 33                      | 3.5 (-23.9, 30.9)           | 0.803   | 30                     | 5.2 (-19.4, 29.8)           | 0.680   |
|                                                 | Lamotrigine+ Levetiracetam              | 24                      | 4.9 (-4.1, 13.8)            | 0.285   | 22                     | 2.6 (-9.5, 14.7)            | 0.672   |
|                                                 | Other Polytherapy                       | 25                      | -4.5 (-22.8, 13.8)          | 0.632   | 25                     | -4.8 (-24.1, 14.4)          | 0.623   |
| <i>P-Value for Interaction Term<sup>e</sup></i> |                                         | -                       | -                           | 0.857   | -                      | -                           | 0.927   |
| <b>BASC-2 Somatization Subscale T-Score</b>     |                                         |                         |                             |         |                        |                             |         |
| Age 2                                           | Lamotrigine                             | 96                      | 0.3 (-6.6, 7.2)             | 0.923   | 94                     | -0.1 (-7.5, 7.2)            | 0.971   |
|                                                 | Levetiracetam                           | 71                      | 11.1 (7.1, 15.1)            | <.001   | 68                     | 11.2 (7.5, 15.0)            | <.001   |
|                                                 | Other Monotherapy                       | 44                      | -5.1 (-16.8, 6.6)           | 0.390   | 41                     | -5.7 (-18.3, 6.9)           | 0.372   |
|                                                 | Lamotrigine+ Levetiracetam              | 27                      | -1.0 (-8.8, 6.9)            | 0.809   | 26                     | -6.6 (-13.8, 0.6)           | 0.071   |
|                                                 | Other Polytherapy                       | 27                      | -9.9 (-21.3, 1.6)           | 0.090   | 27                     | -10.7 (-21.5, 0.1)          | 0.052   |
| Age 3                                           | Lamotrigine                             | 94                      | -2.1 (-10.5, 6.4)           | 0.633   | 89                     | -3.0 (-12.2, 6.2)           | 0.519   |
|                                                 | Levetiracetam                           | 74                      | 8.3 (3.1, 13.5)             | 0.002   | 68                     | 8.3 (3.2, 13.4)             | 0.001   |
|                                                 | Other Monotherapy                       | 41                      | -7.6 (-21.7, 6.4)           | 0.287   | 38                     | -7.8 (-22.3, 6.6)           | 0.288   |
|                                                 | Lamotrigine+ Levetiracetam              | 24                      | 1.4 (-9.2, 12.0)            | 0.793   | 23                     | -6.7 (-15.3, 2.0)           | 0.130   |
|                                                 | Other Polytherapy                       | 27                      | -6.2 (-16.1, 3.6)           | 0.215   | 27                     | -7.1 (-17.4, 3.2)           | 0.175   |
| Age 4.5                                         | Lamotrigine                             | 79                      | 1.5 (-7.8, 10.8)            | 0.751   | 77                     | 0.5 (-8.9, 10.0)            | 0.916   |
|                                                 | Levetiracetam                           | 71                      | 5.9 (-0.7, 12.5)            | 0.078   | 64                     | 6.0 (-0.9, 12.9)            | 0.088   |
|                                                 | Other Monotherapy                       | 33                      | -2.4 (-13.0, 8.2)           | 0.658   | 30                     | -2.3 (-13.4, 8.8)           | 0.686   |
|                                                 | Lamotrigine+ Levetiracetam              | 24                      | 0.6 (-10.6, 11.8)           | 0.918   | 22                     | -8.7 (-15.8, -1.6)          | 0.016   |

|                                                 |                                         | Unadjusted <sup>b</sup> |                             |         | Adjusted <sup>bc</sup> |                             |         |
|-------------------------------------------------|-----------------------------------------|-------------------------|-----------------------------|---------|------------------------|-----------------------------|---------|
| Child's Age                                     | 3rd Trimester ASM Category <sup>d</sup> | N                       | Parameter Estimate (95% CI) | P-Value | N                      | Parameter Estimate (95% CI) | P-Value |
|                                                 | Other Polytherapy                       | 25                      | -8.7 (-16.7, -0.8)          | 0.032   | 25                     | -9.6 (-18.1, -1.0)          | 0.028   |
| <i>P-Value for Interaction Term<sup>e</sup></i> |                                         | -                       | -                           | 0.821   | -                      | -                           | 0.895   |
| <b>BASC-2 Atypicality Subscale T-Score</b>      |                                         |                         |                             |         |                        |                             |         |
| Age 2                                           | Lamotrigine                             | 96                      | 6.8 (-0.3, 13.8)            | 0.062   | 94                     | 7.2 (0.3, 14.0)             | 0.040   |
|                                                 | Levetiracetam                           | 70                      | -2.0 (-9.0, 4.9)            | 0.566   | 67                     | -1.7 (-8.8, 5.5)            | 0.649   |
|                                                 | Other Monotherapy                       | 44                      | -2.0 (-17.1, 13.1)          | 0.798   | 41                     | -2.7 (-17.2, 11.8)          | 0.718   |
|                                                 | Lamotrigine+ Levetiracetam              | 27                      | 9.6 (5.2, 14.0)             | <.001   | 26                     | 6.7 (2.2, 11.3)             | 0.004   |
|                                                 | Other Polytherapy                       | 27                      | -1.5 (-11.2, 8.1)           | 0.758   | 27                     | -1.0 (-9.7, 7.6)            | 0.817   |
| Age 3                                           | Lamotrigine                             | 94                      | 5.9 (-2.2, 14.0)            | 0.156   | 89                     | 6.7 (-2.1, 15.6)            | 0.137   |
|                                                 | Levetiracetam                           | 74                      | 3.7 (-2.7, 10.1)            | 0.259   | 68                     | 4.7 (-1.8, 11.3)            | 0.156   |
|                                                 | Other Monotherapy                       | 41                      | 0.7 (-20.4, 21.8)           | 0.945   | 38                     | 0.1 (-18.8, 18.9)           | 0.995   |
|                                                 | Lamotrigine+ Levetiracetam              | 24                      | 4.4 (-3.5, 12.3)            | 0.275   | 23                     | 0.6 (-8.3, 9.5)             | 0.896   |
|                                                 | Other Polytherapy                       | 27                      | -0.8 (-7.4, 5.9)            | 0.821   | 27                     | -0.2 (-6.3, 5.8)            | 0.941   |
| Age 4.5                                         | Lamotrigine                             | 79                      | 4.0 (-3.8, 11.8)            | 0.315   | 77                     | 3.9 (-3.5, 11.4)            | 0.301   |
|                                                 | Levetiracetam                           | 71                      | 8.7 (2.4, 15.0)             | 0.007   | 64                     | 9.0 (2.1, 15.8)             | 0.011   |
|                                                 | Other Monotherapy                       | 33                      | -1.5 (-24.0, 21.0)          | 0.895   | 30                     | -2.6 (-22.3, 17.0)          | 0.794   |
|                                                 | Lamotrigine+ Levetiracetam              | 24                      | 6.3 (-2.0, 14.7)            | 0.139   | 22                     | 0.3 (-8.2, 8.8)             | 0.941   |
|                                                 | Other Polytherapy                       | 25                      | -0.5 (-15.6, 14.6)          | 0.947   | 25                     | 0.0 (-16.7, 16.7)           | 0.997   |
| <i>P-Value for Interaction Term<sup>e</sup></i> |                                         | -                       | -                           | 0.475   | -                      | -                           | 0.381   |
| <b>BASC-2 Withdrawal Subscale T-Score</b>       |                                         |                         |                             |         |                        |                             |         |
| Age 2                                           | Lamotrigine                             | 96                      | -1.5 (-9.8, 6.8)            | 0.728   | 94                     | -0.3 (-8.6, 8.1)            | 0.949   |
|                                                 | Levetiracetam                           | 70                      | -4.2 (-9.6, 1.1)            | 0.122   | 67                     | -3.1 (-8.5, 2.3)            | 0.264   |

|                                                   |                                         | Unadjusted <sup>b</sup> |                             |         | Adjusted <sup>bc</sup> |                             |         |
|---------------------------------------------------|-----------------------------------------|-------------------------|-----------------------------|---------|------------------------|-----------------------------|---------|
| Child's Age                                       | 3rd Trimester ASM Category <sup>d</sup> | N                       | Parameter Estimate (95% CI) | P-Value | N                      | Parameter Estimate (95% CI) | P-Value |
|                                                   | Other Monotherapy                       | 44                      | -7.5 (-14.9, -0.2)          | 0.043   | 41                     | -6.6 (-14.9, 1.6)           | 0.113   |
|                                                   | Lamotrigine+ Levetiracetam              | 27                      | 0.5 (-6.4, 7.4)             | 0.888   | 26                     | 0.7 (-7.4, 8.8)             | 0.865   |
|                                                   | Other Polytherapy                       | 27                      | 4.2 (-4.1, 12.6)            | 0.323   | 27                     | 2.8 (-5.8, 11.5)            | 0.517   |
| Age 3                                             | Lamotrigine                             | 94                      | -3.0 (-9.6, 3.6)            | 0.374   | 89                     | -1.4 (-8.1, 5.3)            | 0.673   |
|                                                   | Levetiracetam                           | 73                      | -0.2 (-7.1, 6.8)            | 0.966   | 67                     | 0.3 (-7.2, 7.8)             | 0.933   |
|                                                   | Other Monotherapy                       | 41                      | 10.1 (-2.4, 22.6)           | 0.113   | 38                     | 11.5 (0.6, 22.3)            | 0.039   |
|                                                   | Lamotrigine+ Levetiracetam              | 24                      | 1.8 (-5.3, 8.8)             | 0.626   | 23                     | 2.3 (-6.5, 11.2)            | 0.602   |
|                                                   | Other Polytherapy                       | 27                      | 4.0 (-4.7, 12.7)            | 0.367   | 27                     | 2.6 (-5.9, 11.2)            | 0.546   |
| Age 4.5                                           | Lamotrigine                             | 79                      | -2.4 (-10.6, 5.8)           | 0.564   | 77                     | -1.5 (-10.0, 7.1)           | 0.737   |
|                                                   | Levetiracetam                           | 71                      | 4.1 (-5.3, 13.5)            | 0.392   | 64                     | 4.9 (-5.0, 14.7)            | 0.332   |
|                                                   | Other Monotherapy                       | 33                      | 1.2 (-14.5, 16.8)           | 0.885   | 30                     | 2.9 (-10.7, 16.4)           | 0.678   |
|                                                   | Lamotrigine+ Levetiracetam              | 24                      | -0.9 (-6.2, 4.4)            | 0.729   | 22                     | 0.1 (-7.3, 7.4)             | 0.988   |
|                                                   | Other Polytherapy                       | 25                      | 6.4 (-4.5, 17.3)            | 0.252   | 25                     | 5.0 (-5.8, 15.7)            | 0.366   |
| <i>P-Value for Interaction Term<sup>e</sup></i>   |                                         | -                       | -                           | 0.354   | -                      | -                           | 0.409   |
| <b>BASC-2 Attention Problems Subscale T-Score</b> |                                         |                         |                             |         |                        |                             |         |
| Age 2                                             | Lamotrigine                             | 96                      | -2.6 (-9.8, 4.7)            | 0.490   | 94                     | -1.8 (-9.1, 5.5)            | 0.628   |
|                                                   | Levetiracetam                           | 71                      | 4.6 (-1.9, 11.0)            | 0.166   | 68                     | 5.7 (-0.7, 12.2)            | 0.081   |
|                                                   | Other Monotherapy                       | 44                      | 7.1 (-2.9, 17.1)            | 0.165   | 41                     | 5.1 (-4.8, 14.9)            | 0.313   |
|                                                   | Lamotrigine+ Levetiracetam              | 27                      | 5.9 (-0.3, 12.2)            | 0.063   | 26                     | 3.7 (-2.3, 9.8)             | 0.228   |
|                                                   | Other Polytherapy                       | 27                      | -6.0 (-15.5, 3.5)           | 0.219   | 27                     | -6.5 (-16.7, 3.7)           | 0.212   |
| Age 3                                             | Lamotrigine                             | 94                      | -3.8 (-12.2, 4.7)           | 0.380   | 89                     | -2.1 (-10.3, 6.0)           | 0.610   |
|                                                   | Levetiracetam                           | 74                      | 5.7 (-1.5, 13.0)            | 0.118   | 68                     | 7.8 (0.6, 15.0)             | 0.034   |



|                                                 |                                         | Unadjusted <sup>b</sup> |                             |         | Adjusted <sup>bc</sup> |                             |         |
|-------------------------------------------------|-----------------------------------------|-------------------------|-----------------------------|---------|------------------------|-----------------------------|---------|
| Child's Age                                     | 3rd Trimester ASM Category <sup>d</sup> | N                       | Parameter Estimate (95% CI) | P-Value | N                      | Parameter Estimate (95% CI) | P-Value |
|                                                 | Other Monotherapy                       | 41                      | 2.0 (-16.0, 20.1)           | 0.826   | 38                     | 1.6 (-16.9, 20.1)           | 0.865   |
|                                                 | Lamotrigine+ Levetiracetam              | 24                      | 1.8 (-8.4, 11.9)            | 0.735   | 23                     | -2.1 (-12.4, 8.1)           | 0.682   |
|                                                 | Other Polytherapy                       | 27                      | -5.0 (-13.0, 3.1)           | 0.227   | 27                     | -5.5 (-14.2, 3.3)           | 0.221   |
| Age 4.5                                         | Lamotrigine                             | 79                      | -0.4 (-8.6, 7.8)            | 0.933   | 77                     | 1.1 (-6.6, 8.8)             | 0.778   |
|                                                 | Levetiracetam                           | 71                      | 8.1 (2.0, 14.2)             | 0.009   | 64                     | 10.5 (4.7, 16.4)            | <.001   |
|                                                 | Other Monotherapy                       | 33                      | -4.9 (-18.9, 9.2)           | 0.499   | 30                     | -6.4 (-19.6, 6.8)           | 0.343   |
|                                                 | Lamotrigine+ Levetiracetam              | 24                      | 3.2 (-5.4, 11.8)            | 0.465   | 22                     | -1.9 (-10.0, 6.1)           | 0.641   |
|                                                 | Other Polytherapy                       | 25                      | -1.6 (-14.6, 11.5)          | 0.812   | 25                     | -2.2 (-16.4, 11.9)          | 0.758   |
| <i>P-Value for Interaction Term<sup>e</sup></i> |                                         | -                       | -                           | 0.599   | -                      | -                           | 0.396   |
| <b>BASC-2 Adaptability Subscale T-Score</b>     |                                         |                         |                             |         |                        |                             |         |
| Age 2                                           | Lamotrigine                             | 96                      | -2.4 (-10.3, 5.6)           | 0.564   | 94                     | -3.7 (-11.6, 4.2)           | 0.358   |
|                                                 | Levetiracetam                           | 71                      | 3.9 (-2.4, 10.2)            | 0.228   | 68                     | 3.2 (-2.9, 9.3)             | 0.305   |
|                                                 | Other Monotherapy                       | 44                      | -9.0 (-19.1, 1.2)           | 0.083   | 41                     | -8.8 (-19.3, 1.6)           | 0.098   |
|                                                 | Lamotrigine+ Levetiracetam              | 27                      | 0.7 (-10.0, 11.5)           | 0.896   | 26                     | 3.2 (-7.0, 13.4)            | 0.542   |
|                                                 | Other Polytherapy                       | 27                      | -1.3 (-10.0, 7.3)           | 0.763   | 27                     | 0.1 (-9.1, 9.3)             | 0.981   |
| Age 3                                           | Lamotrigine                             | 94                      | -2.3 (-10.8, 6.3)           | 0.605   | 89                     | -4.0 (-11.8, 3.8)           | 0.318   |
|                                                 | Levetiracetam                           | 74                      | -1.1 (-9.8, 7.5)            | 0.801   | 68                     | -1.2 (-9.6, 7.2)            | 0.781   |
|                                                 | Other Monotherapy                       | 41                      | -15.4 (-29.9, -1.0)         | 0.036   | 38                     | -14.3 (-27.0, -1.6)         | 0.027   |
|                                                 | Lamotrigine+ Levetiracetam              | 24                      | -10.2 (-21.0, 0.5)          | 0.062   | 23                     | -7.3 (-18.3, 3.7)           | 0.194   |
|                                                 | Other Polytherapy                       | 27                      | 0.3 (-7.8, 8.3)             | 0.949   | 27                     | 1.7 (-7.5, 10.8)            | 0.718   |
| Age 4.5                                         | Lamotrigine                             | 79                      | -2.5 (-12.6, 7.7)           | 0.635   | 77                     | -4.4 (-14.7, 5.9)           | 0.402   |
|                                                 | Levetiracetam                           | 71                      | -7.9 (-17.8, 1.9)           | 0.116   | 64                     | -9.3 (-18.7, 0.2)           | 0.055   |

|                                                 |                                         | Unadjusted <sup>b</sup> |                             |         | Adjusted <sup>bc</sup> |                             |         |
|-------------------------------------------------|-----------------------------------------|-------------------------|-----------------------------|---------|------------------------|-----------------------------|---------|
| Child's Age                                     | 3rd Trimester ASM Category <sup>d</sup> | N                       | Parameter Estimate (95% CI) | P-Value | N                      | Parameter Estimate (95% CI) | P-Value |
|                                                 | Other Monotherapy                       | 33                      | -0.6 (-18.2, 17.1)          | 0.949   | 30                     | 0.9 (-14.6, 16.4)           | 0.908   |
|                                                 | Lamotrigine+ Levetiracetam              | 24                      | 0.1 (-9.6, 9.8)             | 0.978   | 22                     | 4.1 (-5.0, 13.2)            | 0.376   |
|                                                 | Other Polytherapy                       | 25                      | -0.5 (-12.4, 11.5)          | 0.940   | 25                     | 1.1 (-11.1, 13.3)           | 0.855   |
| <i>P-Value for Interaction Term<sup>e</sup></i> |                                         | -                       | -                           | 0.056   | -                      | -                           | 0.023   |
| <b>BASC-2 Social Skills Subscale T-Score</b>    |                                         |                         |                             |         |                        |                             |         |
| Age 2                                           | Lamotrigine                             | 96                      | -0.4 (-7.4, 6.6)            | 0.914   | 94                     | -1.3 (-8.3, 5.7)            | 0.719   |
|                                                 | Levetiracetam                           | 71                      | -7.9 (-12.6, -3.1)          | 0.001   | 68                     | -8.6 (-13.5, -3.8)          | <.001   |
|                                                 | Other Monotherapy                       | 44                      | -2.9 (-13.1, 7.3)           | 0.576   | 41                     | 0.3 (-9.4, 10.1)            | 0.949   |
|                                                 | Lamotrigine+ Levetiracetam              | 27                      | 1.4 (-10.6, 13.5)           | 0.814   | 26                     | 0.7 (-12.4, 13.7)           | 0.922   |
|                                                 | Other Polytherapy                       | 27                      | -4.3 (-12.8, 4.2)           | 0.318   | 27                     | -3.7 (-12.2, 4.9)           | 0.397   |
| Age 3                                           | Lamotrigine                             | 94                      | -2.5 (-9.8, 4.9)            | 0.507   | 89                     | -4.8 (-11.6, 1.9)           | 0.160   |
|                                                 | Levetiracetam                           | 74                      | -6.2 (-12.4, 0.0)           | 0.050   | 68                     | -7.1 (-13.3, -0.8)          | 0.026   |
|                                                 | Other Monotherapy                       | 41                      | -8.7 (-22.7, 5.2)           | 0.218   | 38                     | -6.4 (-18.8, 6.1)           | 0.317   |
|                                                 | Lamotrigine+ Levetiracetam              | 24                      | 1.9 (-7.4, 11.1)            | 0.690   | 23                     | 0.9 (-10.2, 12.0)           | 0.874   |
|                                                 | Other Polytherapy                       | 27                      | -1.1 (-13.5, 11.4)          | 0.868   | 27                     | -0.4 (-14.1, 13.2)          | 0.949   |
| Age 4.5                                         | Lamotrigine                             | 79                      | -2.4 (-11.8, 7.0)           | 0.617   | 77                     | -4.4 (-13.5, 4.7)           | 0.344   |
|                                                 | Levetiracetam                           | 71                      | -10.1 (-18.4, -1.9)         | 0.016   | 64                     | -11.7 (-19.8, -3.5)         | 0.005   |
|                                                 | Other Monotherapy                       | 33                      | 7.2 (-8.1, 22.6)            | 0.357   | 30                     | 11.6 (-2.2, 25.5)           | 0.100   |
|                                                 | Lamotrigine+ Levetiracetam              | 24                      | 1.0 (-6.6, 8.6)             | 0.793   | 22                     | -0.4 (-9.3, 8.6)            | 0.937   |
|                                                 | Other Polytherapy                       | 25                      | -1.5 (-17.7, 14.7)          | 0.857   | 25                     | -0.8 (-17.9, 16.3)          | 0.923   |
| <i>P-Value for Interaction Term<sup>e</sup></i> |                                         | -                       | -                           | 0.833   | -                      | -                           | 0.672   |

|             |                                         | Unadjusted <sup>b</sup> |                             |         | Adjusted <sup>bc</sup> |                             |         |
|-------------|-----------------------------------------|-------------------------|-----------------------------|---------|------------------------|-----------------------------|---------|
| Child's Age | 3rd Trimester ASM Category <sup>d</sup> | N                       | Parameter Estimate (95% CI) | P-Value | N                      | Parameter Estimate (95% CI) | P-Value |

N = children of WWE with non-missing behavior score and mothers with max observed ratio ASM Concentration in 3rd

trimester (includes day of delivery). Children with missing covariates excluded from adjusted model.

<sup>a</sup> Ratio ASM Concentration calculated as ratio upper limit for therapeutic range. For mothers on polytherapy, ratio ASM concentration calculated by summing the ratio ASM concentration for each ASM. Maximum observed value recorded during 3rd trimester, including day of delivery.

<sup>b</sup> Parameter Estimate and P-Value from a longitudinal generalized linear model with identity link function and generalized estimating equations and unstructured covariance structure including mother's max observed ratio ASM

concentration in 3rd trimester, ASM category, child's age, their interaction, and all lower order interactions.

<sup>c</sup> Adjusted for mother's IQ, education level, age at enrollment, smoking during pregnancy, post-birth average BAI score through child's 2YO visit, McMaster FAD problematic family functioning at child's 2YO Visit, and child's sex and small for gestational age status. Mother's ASM group was not included as a covariate in model.

<sup>d</sup> Based on ASM regimen taken at time of blood draw for maximum observed ratio ASM concentration during 3rd trimester (includes day of delivery).

<sup>e</sup> P-value for the interaction between max observed ratio ASM concentration in 3rd trimester, ASM category, and child's age calculated using the Score test. If significant, the association between max observed ratio ASM concentration in 3rd trimester and behavior score differs among child's age and ASM category.

**eTable 23.** Association Between Continuous Behavior Scores and Maximum Ratio DDD<sup>a</sup> in 3rd Trimester by ASM Category and Child's Age, Children of WWE With 3rd Trimester Blood Levels, Completers Population

|                                                         |                                         | Unadjusted <sup>b</sup> |                             |         | Adjusted <sup>bc</sup> |                             |         |
|---------------------------------------------------------|-----------------------------------------|-------------------------|-----------------------------|---------|------------------------|-----------------------------|---------|
| Child's Age                                             | 3rd Trimester ASM Category <sup>d</sup> | N                       | Parameter Estimate (95% CI) | P-Value | N                      | Parameter Estimate (95% CI) | P-Value |
| <b>ABAS-3 General Adaptive Composite Standard Score</b> |                                         |                         |                             |         |                        |                             |         |
| Age 3                                                   | Lamotrigine                             | 93                      | -2.2 (-4.5, 0.1)            | 0.065   | 88                     | -2.3 (-4.3, -0.2)           | 0.031   |
|                                                         | Levetiracetam                           | 76                      | -1.4 (-4.8, 1.9)            | 0.406   | 68                     | -2.1 (-5.1, 1.0)            | 0.189   |
|                                                         | Other Monotherapy                       | 46                      | 1.6 (-3.7, 6.9)             | 0.551   | 43                     | 3.8 (-1.8, 9.5)             | 0.181   |
|                                                         | Lamotrigine+ Levetiracetam              | 26                      | -1.9 (-5.8, 2.0)            | 0.333   | 25                     | -0.9 (-3.9, 2.1)            | 0.565   |
|                                                         | Other Polytherapy                       | 37                      | -2.0 (-3.5, -0.6)           | 0.006   | 36                     | -1.5 (-3.0, 0.1)            | 0.059   |
| Age 4.5                                                 | Lamotrigine                             | 78                      | -2.4 (-4.7, -0.1)           | 0.045   | 76                     | -2.4 (-4.6, -0.3)           | 0.028   |
|                                                         | Levetiracetam                           | 71                      | -5.4 (-8.8, -2.0)           | 0.002   | 63                     | -6.5 (-9.5, -3.5)           | <.001   |
|                                                         | Other Monotherapy                       | 33                      | 2.7 (-2.8, 8.2)             | 0.335   | 32                     | 4.8 (0.3, 9.4)              | 0.038   |
|                                                         | Lamotrigine+ Levetiracetam              | 24                      | -1.3 (-6.0, 3.3)            | 0.568   | 22                     | 0.3 (-2.4, 2.9)             | 0.843   |
|                                                         | Other Polytherapy                       | 33                      | -1.9 (-3.0, -0.8)           | <.001   | 33                     | -1.3 (-2.7, 0.1)            | 0.076   |
| <i>P-Value for Interaction Term<sup>e</sup></i>         |                                         | -                       | -                           | 0.079   | -                      | -                           | 0.028   |
| <b>ABAS-3 Conceptual Composite Standard Score</b>       |                                         |                         |                             |         |                        |                             |         |
| Age 3                                                   | Lamotrigine                             | 93                      | -1.4 (-3.6, 0.9)            | 0.240   | 88                     | -1.5 (-3.6, 0.7)            | 0.176   |
|                                                         | Levetiracetam                           | 77                      | -3.3 (-8.0, 1.4)            | 0.166   | 69                     | -3.2 (-6.9, 0.6)            | 0.100   |
|                                                         | Other Monotherapy                       | 46                      | 3.1 (-2.2, 8.4)             | 0.249   | 43                     | 4.5 (-1.2, 10.1)            | 0.120   |
|                                                         | Lamotrigine+ Levetiracetam              | 26                      | -1.4 (-6.2, 3.4)            | 0.575   | 25                     | -0.7 (-3.9, 2.6)            | 0.690   |
|                                                         | Other Polytherapy                       | 37                      | -2.4 (-4.0, -0.8)           | 0.003   | 36                     | -1.5 (-3.2, 0.2)            | 0.082   |
| Age 4.5                                                 | Lamotrigine                             | 78                      | -1.7 (-3.9, 0.5)            | 0.139   | 76                     | -1.7 (-3.8, 0.3)            | 0.097   |
|                                                         | Levetiracetam                           | 71                      | -4.9 (-9.2, -0.6)           | 0.026   | 63                     | -5.5 (-9.2, -1.7)           | 0.004   |
|                                                         | Other Monotherapy                       | 33                      | 3.3 (-2.4, 9.1)             | 0.257   | 32                     | 4.8 (-0.1, 9.6)             | 0.056   |

|                                                  |                                         | Unadjusted <sup>b</sup> |                             |         | Adjusted <sup>bc</sup> |                             |         |
|--------------------------------------------------|-----------------------------------------|-------------------------|-----------------------------|---------|------------------------|-----------------------------|---------|
| Child's Age                                      | 3rd Trimester ASM Category <sup>d</sup> | N                       | Parameter Estimate (95% CI) | P-Value | N                      | Parameter Estimate (95% CI) | P-Value |
|                                                  | Lamotrigine+ Levetiracetam              | 24                      | -0.8 (-5.2, 3.7)            | 0.735   | 22                     | 0.4 (-2.0, 2.7)             | 0.771   |
|                                                  | Other Polytherapy                       | 33                      | -2.7 (-3.9, -1.4)           | <.001   | 33                     | -1.7 (-3.1, -0.3)           | 0.016   |
| <i>P-Value for Interaction Term<sup>e</sup></i>  |                                         | -                       | -                           | 0.795   | -                      | -                           | 0.457   |
| <b>ABAS-3 Social Composite Standard Score</b>    |                                         |                         |                             |         |                        |                             |         |
| Age 3                                            | Lamotrigine                             | 93                      | -2.0 (-4.4, 0.4)            | 0.095   | 88                     | -2.0 (-4.0, 0.1)            | 0.059   |
|                                                  | Levetiracetam                           | 76                      | -1.5 (-4.5, 1.6)            | 0.341   | 68                     | -2.1 (-5.1, 0.9)            | 0.178   |
|                                                  | Other Monotherapy                       | 46                      | 0.4 (-5.1, 5.9)             | 0.885   | 43                     | 3.4 (-2.5, 9.3)             | 0.260   |
|                                                  | Lamotrigine+ Levetiracetam              | 26                      | -1.3 (-4.7, 2.1)            | 0.443   | 25                     | -1.1 (-4.7, 2.5)            | 0.557   |
|                                                  | Other Polytherapy                       | 37                      | -2.6 (-4.2, -0.9)           | 0.002   | 36                     | -2.0 (-3.9, -0.1)           | 0.039   |
| Age 4.5                                          | Lamotrigine                             | 80                      | -1.4 (-3.7, 0.9)            | 0.248   | 78                     | -1.3 (-3.5, 0.8)            | 0.228   |
|                                                  | Levetiracetam                           | 71                      | -4.8 (-8.0, -1.6)           | 0.003   | 63                     | -5.7 (-8.6, -2.9)           | <.001   |
|                                                  | Other Monotherapy                       | 33                      | 0.2 (-4.8, 5.3)             | 0.932   | 32                     | 2.8 (-1.9, 7.4)             | 0.242   |
|                                                  | Lamotrigine+ Levetiracetam              | 24                      | -0.1 (-4.5, 4.3)            | 0.964   | 22                     | 0.5 (-2.2, 3.3)             | 0.697   |
|                                                  | Other Polytherapy                       | 34                      | -2.7 (-3.9, -1.5)           | <.001   | 33                     | -2.2 (-3.5, -0.9)           | 0.001   |
| <i>P-Value for Interaction Term<sup>e</sup></i>  |                                         | -                       | -                           | 0.192   | -                      | -                           | 0.114   |
| <b>ABAS-3 Practical Composite Standard Score</b> |                                         |                         |                             |         |                        |                             |         |
| Age 3                                            | Lamotrigine                             | 93                      | -2.2 (-4.6, 0.2)            | 0.078   | 88                     | -2.1 (-4.2, 0.1)            | 0.056   |
|                                                  | Levetiracetam                           | 77                      | -1.9 (-5.2, 1.5)            | 0.281   | 69                     | -2.2 (-5.2, 0.8)            | 0.145   |
|                                                  | Other Monotherapy                       | 46                      | 1.5 (-3.7, 6.7)             | 0.575   | 43                     | 4.2 (-1.4, 9.8)             | 0.142   |
|                                                  | Lamotrigine+ Levetiracetam              | 26                      | -2.6 (-6.2, 1.1)            | 0.167   | 25                     | -2.0 (-5.3, 1.3)            | 0.229   |
|                                                  | Other Polytherapy                       | 37                      | -1.3 (-2.7, 0.2)            | 0.088   | 36                     | -0.9 (-2.2, 0.5)            | 0.207   |
| Age 4.5                                          | Lamotrigine                             | 79                      | -2.7 (-5.2, -0.3)           | 0.029   | 77                     | -2.6 (-4.9, -0.3)           | 0.027   |

|                                                 |                                         | Unadjusted <sup>b</sup> |                             |         | Adjusted <sup>bc</sup> |                             |         |
|-------------------------------------------------|-----------------------------------------|-------------------------|-----------------------------|---------|------------------------|-----------------------------|---------|
| Child's Age                                     | 3rd Trimester ASM Category <sup>d</sup> | N                       | Parameter Estimate (95% CI) | P-Value | N                      | Parameter Estimate (95% CI) | P-Value |
|                                                 | Levetiracetam                           | 71                      | -6.2 (-9.4, -3.0)           | <.001   | 63                     | -6.9 (-9.7, -4.2)           | <.001   |
|                                                 | Other Monotherapy                       | 33                      | 4.0 (-1.1, 9.0)             | 0.123   | 32                     | 6.4 (2.2, 10.6)             | 0.003   |
|                                                 | Lamotrigine+ Levetiracetam              | 24                      | -1.5 (-5.4, 2.5)            | 0.467   | 22                     | -0.1 (-2.8, 2.7)            | 0.969   |
|                                                 | Other Polytherapy                       | 34                      | -0.4 (-1.9, 1.1)            | 0.623   | 33                     | 0.0 (-1.9, 1.8)             | 0.961   |
| <i>P-Value for Interaction Term<sup>e</sup></i> |                                         | -                       | -                           | 0.021   | -                      | -                           | 0.006   |
| <b>BASC-2 Hyperactivity Subscale T-Score</b>    |                                         |                         |                             |         |                        |                             |         |
| Age 2                                           | Lamotrigine                             | 96                      | 0.9 (-0.7, 2.4)             | 0.272   | 94                     | 0.9 (-0.7, 2.4)             | 0.260   |
|                                                 | Levetiracetam                           | 72                      | 1.2 (-1.5, 3.9)             | 0.374   | 69                     | 1.4 (-1.2, 3.9)             | 0.293   |
|                                                 | Other Monotherapy                       | 46                      | 0.0 (-3.0, 3.0)             | 0.996   | 44                     | -0.3 (-3.5, 2.9)            | 0.870   |
|                                                 | Lamotrigine+ Levetiracetam              | 29                      | 2.2 (-1.8, 6.3)             | 0.277   | 28                     | 0.2 (-3.1, 3.4)             | 0.911   |
|                                                 | Other Polytherapy                       | 39                      | 1.7 (-0.3, 3.7)             | 0.088   | 37                     | 1.3 (-0.6, 3.2)             | 0.170   |
| Age 3                                           | Lamotrigine                             | 94                      | 1.5 (-0.4, 3.3)             | 0.130   | 89                     | 1.5 (-0.5, 3.4)             | 0.137   |
|                                                 | Levetiracetam                           | 75                      | 0.4 (-1.6, 2.4)             | 0.684   | 68                     | 0.6 (-1.3, 2.5)             | 0.521   |
|                                                 | Other Monotherapy                       | 45                      | 0.1 (-3.2, 3.4)             | 0.934   | 42                     | -0.8 (-4.2, 2.6)            | 0.640   |
|                                                 | Lamotrigine+ Levetiracetam              | 26                      | 2.4 (0.1, 4.6)              | 0.041   | 25                     | 1.2 (-1.6, 4.0)             | 0.402   |
|                                                 | Other Polytherapy                       | 37                      | 1.6 (0.1, 3.1)              | 0.034   | 36                     | 1.2 (-0.3, 2.7)             | 0.107   |
| Age 4.5                                         | Lamotrigine                             | 78                      | 1.5 (0.0, 3.0)              | 0.045   | 76                     | 1.5 (-0.1, 3.0)             | 0.058   |
|                                                 | Levetiracetam                           | 72                      | 3.7 (0.2, 7.1)              | 0.037   | 64                     | 3.8 (0.2, 7.4)              | 0.040   |
|                                                 | Other Monotherapy                       | 34                      | 0.6 (-3.5, 4.7)             | 0.787   | 32                     | 0.1 (-4.5, 4.7)             | 0.969   |
|                                                 | Lamotrigine+ Levetiracetam              | 24                      | 1.2 (-2.2, 4.6)             | 0.494   | 22                     | -1.2 (-4.0, 1.6)            | 0.385   |
|                                                 | Other Polytherapy                       | 34                      | 1.5 (-0.7, 3.8)             | 0.185   | 33                     | 1.1 (-1.1, 3.3)             | 0.342   |
| <i>P-Value for Interaction Term<sup>e</sup></i> |                                         | -                       | -                           | 0.775   | -                      | -                           | 0.636   |

|                                                 |                                         | Unadjusted <sup>b</sup> |                             |         | Adjusted <sup>bc</sup> |                             |         |
|-------------------------------------------------|-----------------------------------------|-------------------------|-----------------------------|---------|------------------------|-----------------------------|---------|
| Child's Age                                     | 3rd Trimester ASM Category <sup>d</sup> | N                       | Parameter Estimate (95% CI) | P-Value | N                      | Parameter Estimate (95% CI) | P-Value |
| <b>BASC-2 Aggression Subscale T-Score</b>       |                                         |                         |                             |         |                        |                             |         |
| Age 2                                           | Lamotrigine                             | 96                      | 0.9 (-0.3, 2.1)             | 0.151   | 94                     | 0.8 (-0.4, 2.1)             | 0.194   |
|                                                 | Levetiracetam                           | 72                      | 0.2 (-0.9, 1.4)             | 0.700   | 69                     | 0.3 (-0.9, 1.5)             | 0.633   |
|                                                 | Other Monotherapy                       | 46                      | -0.2 (-3.8, 3.3)            | 0.899   | 44                     | 0.3 (-3.4, 4.0)             | 0.859   |
|                                                 | Lamotrigine+ Levetiracetam              | 29                      | 0.3 (-1.7, 2.4)             | 0.753   | 28                     | 0.1 (-2.1, 2.3)             | 0.908   |
|                                                 | Other Polytherapy                       | 39                      | 1.1 (-1.0, 3.1)             | 0.299   | 37                     | 0.8 (-1.2, 2.8)             | 0.421   |
| Age 3                                           | Lamotrigine                             | 94                      | 0.9 (-0.5, 2.3)             | 0.224   | 89                     | 0.8 (-0.7, 2.4)             | 0.283   |
|                                                 | Levetiracetam                           | 75                      | 2.0 (0.5, 3.4)              | 0.007   | 68                     | 2.0 (0.6, 3.4)              | 0.005   |
|                                                 | Other Monotherapy                       | 45                      | -1.4 (-3.9, 1.2)            | 0.287   | 42                     | -0.9 (-3.8, 1.9)            | 0.523   |
|                                                 | Lamotrigine+ Levetiracetam              | 26                      | 1.8 (-0.6, 4.2)             | 0.138   | 25                     | 2.0 (-0.4, 4.4)             | 0.096   |
|                                                 | Other Polytherapy                       | 37                      | 1.5 (-0.3, 3.4)             | 0.100   | 36                     | 1.2 (-0.4, 2.9)             | 0.148   |
| Age 4.5                                         | Lamotrigine                             | 78                      | 0.0 (-1.3, 1.3)             | 0.967   | 76                     | -0.3 (-1.5, 1.0)            | 0.663   |
|                                                 | Levetiracetam                           | 72                      | 1.8 (-0.4, 4.0)             | 0.102   | 64                     | 2.0 (-0.3, 4.3)             | 0.095   |
|                                                 | Other Monotherapy                       | 34                      | -0.6 (-3.5, 2.3)            | 0.682   | 32                     | -0.6 (-3.6, 2.3)            | 0.675   |
|                                                 | Lamotrigine+ Levetiracetam              | 24                      | 0.8 (-1.3, 2.9)             | 0.459   | 22                     | 0.2 (-2.1, 2.4)             | 0.881   |
|                                                 | Other Polytherapy                       | 34                      | 0.3 (-0.8, 1.4)             | 0.619   | 33                     | -0.1 (-1.2, 1.1)            | 0.920   |
| <i>P-Value for Interaction Term<sup>e</sup></i> |                                         | -                       | -                           | 0.381   | -                      | -                           | 0.337   |
| <b>BASC-2 Anxiety Subscale T-Score</b>          |                                         |                         |                             |         |                        |                             |         |
| Age 2                                           | Lamotrigine                             | 94                      | -0.6 (-1.9, 0.6)            | 0.329   | 92                     | -0.8 (-2.1, 0.5)            | 0.254   |
|                                                 | Levetiracetam                           | 72                      | -1.1 (-3.2, 1.0)            | 0.322   | 69                     | -1.3 (-3.3, 0.8)            | 0.233   |
|                                                 | Other Monotherapy                       | 46                      | 0.8 (-2.1, 3.6)             | 0.604   | 44                     | 0.1 (-2.3, 2.6)             | 0.921   |
|                                                 | Lamotrigine+ Levetiracetam              | 29                      | 0.7 (-2.8, 4.2)             | 0.702   | 28                     | 1.9 (-1.2, 4.9)             | 0.231   |

|                                                 |                                         | Unadjusted <sup>b</sup> |                             |         | Adjusted <sup>bc</sup> |                             |         |
|-------------------------------------------------|-----------------------------------------|-------------------------|-----------------------------|---------|------------------------|-----------------------------|---------|
| Child's Age                                     | 3rd Trimester ASM Category <sup>d</sup> | N                       | Parameter Estimate (95% CI) | P-Value | N                      | Parameter Estimate (95% CI) | P-Value |
|                                                 | Other Polytherapy                       | 39                      | 0.2 (-0.9, 1.4)             | 0.686   | 37                     | -0.1 (-1.4, 1.2)            | 0.895   |
| Age 3                                           | Lamotrigine                             | 94                      | -0.7 (-2.4, 0.9)            | 0.370   | 89                     | -0.9 (-2.5, 0.7)            | 0.269   |
|                                                 | Levetiracetam                           | 74                      | -1.0 (-3.3, 1.4)            | 0.424   | 67                     | -1.3 (-3.6, 1.0)            | 0.271   |
|                                                 | Other Monotherapy                       | 45                      | 0.1 (-3.9, 4.1)             | 0.952   | 42                     | -1.4 (-4.6, 1.8)            | 0.401   |
|                                                 | Lamotrigine+ Levetiracetam              | 26                      | 3.2 (-0.4, 6.7)             | 0.079   | 25                     | 4.8 (2.6, 7.0)              | <.001   |
|                                                 | Other Polytherapy                       | 37                      | 0.2 (-1.2, 1.6)             | 0.812   | 36                     | -0.2 (-1.7, 1.3)            | 0.817   |
| Age 4.5                                         | Lamotrigine                             | 78                      | 0.3 (-1.5, 2.2)             | 0.717   | 76                     | 0.2 (-1.7, 2.2)             | 0.811   |
|                                                 | Levetiracetam                           | 72                      | -0.1 (-2.8, 2.7)            | 0.965   | 64                     | -0.1 (-3.0, 2.8)            | 0.951   |
|                                                 | Other Monotherapy                       | 34                      | 2.1 (-2.6, 6.9)             | 0.374   | 32                     | 3.0 (-1.5, 7.4)             | 0.189   |
|                                                 | Lamotrigine+ Levetiracetam              | 24                      | 3.6 (1.8, 5.4)              | <.001   | 22                     | 3.7 (1.6, 5.8)              | <.001   |
|                                                 | Other Polytherapy                       | 34                      | -1.4 (-2.7, -0.1)           | 0.041   | 33                     | -1.6 (-3.2, -0.1)           | 0.035   |
| <i>P-Value for Interaction Term<sup>e</sup></i> |                                         | -                       | -                           | 0.518   | -                      | -                           | 0.271   |
| <b>BASC-2 Depression Subscale T-Score</b>       |                                         |                         |                             |         |                        |                             |         |
| Age 2                                           | Lamotrigine                             | 96                      | 1.3 (0.2, 2.4)              | 0.020   | 94                     | 1.3 (0.2, 2.4)              | 0.026   |
|                                                 | Levetiracetam                           | 72                      | 0.2 (-1.3, 1.6)             | 0.834   | 69                     | 0.1 (-1.4, 1.6)             | 0.868   |
|                                                 | Other Monotherapy                       | 46                      | 1.4 (-1.7, 4.5)             | 0.380   | 44                     | 0.2 (-3.1, 3.4)             | 0.919   |
|                                                 | Lamotrigine+ Levetiracetam              | 29                      | 2.3 (-0.9, 5.4)             | 0.155   | 28                     | 0.9 (-2.0, 3.9)             | 0.545   |
|                                                 | Other Polytherapy                       | 39                      | 0.8 (-1.3, 2.8)             | 0.463   | 37                     | 0.5 (-1.5, 2.5)             | 0.606   |
| Age 3                                           | Lamotrigine                             | 94                      | 0.8 (-0.9, 2.6)             | 0.352   | 89                     | 0.7 (-1.1, 2.5)             | 0.418   |
|                                                 | Levetiracetam                           | 75                      | 0.3 (-1.9, 2.5)             | 0.781   | 68                     | 0.3 (-1.9, 2.5)             | 0.798   |
|                                                 | Other Monotherapy                       | 45                      | 0.7 (-2.7, 4.1)             | 0.680   | 42                     | -1.1 (-4.3, 2.0)            | 0.471   |
|                                                 | Lamotrigine+ Levetiracetam              | 26                      | 4.3 (1.8, 6.8)              | <.001   | 25                     | 3.6 (0.8, 6.3)              | 0.011   |



|                                                 |                                         | Unadjusted <sup>b</sup> |                             |         | Adjusted <sup>bc</sup> |                             |         |
|-------------------------------------------------|-----------------------------------------|-------------------------|-----------------------------|---------|------------------------|-----------------------------|---------|
| Child's Age                                     | 3rd Trimester ASM Category <sup>d</sup> | N                       | Parameter Estimate (95% CI) | P-Value | N                      | Parameter Estimate (95% CI) | P-Value |
|                                                 | Other Polytherapy                       | 37                      | 1.0 (-0.6, 2.6)             | 0.234   | 36                     | 0.7 (-0.8, 2.2)             | 0.366   |
| Age 4.5                                         | Lamotrigine                             | 78                      | 1.8 (0.1, 3.4)              | 0.041   | 76                     | 1.6 (0.0, 3.3)              | 0.052   |
|                                                 | Levetiracetam                           | 72                      | 0.9 (-1.5, 3.3)             | 0.468   | 64                     | 1.0 (-1.4, 3.5)             | 0.408   |
|                                                 | Other Monotherapy                       | 34                      | 0.2 (-4.8, 5.2)             | 0.932   | 32                     | -0.3 (-5.6, 4.9)            | 0.897   |
|                                                 | Lamotrigine+ Levetiracetam              | 24                      | 2.7 (0.3, 5.2)              | 0.028   | 22                     | 1.4 (-1.0, 3.9)             | 0.248   |
|                                                 | Other Polytherapy                       | 34                      | 0.0 (-1.5, 1.6)             | 0.961   | 33                     | -0.1 (-1.8, 1.6)            | 0.868   |
| <i>P-Value for Interaction Term<sup>e</sup></i> |                                         | -                       | -                           | 0.822   | -                      | -                           | 0.680   |
| <b>BASC-2 Somatization Subscale T-Score</b>     |                                         |                         |                             |         |                        |                             |         |
| Age 2                                           | Lamotrigine                             | 96                      | 0.6 (-0.8, 2.0)             | 0.395   | 94                     | 0.3 (-1.2, 1.8)             | 0.665   |
|                                                 | Levetiracetam                           | 72                      | 2.9 (1.6, 4.3)              | <.001   | 69                     | 2.8 (1.5, 4.1)              | <.001   |
|                                                 | Other Monotherapy                       | 46                      | -1.9 (-5.3, 1.5)            | 0.275   | 44                     | -3.5 (-6.9, -0.2)           | 0.040   |
|                                                 | Lamotrigine+ Levetiracetam              | 29                      | 0.8 (-1.0, 2.6)             | 0.375   | 28                     | 0.9 (-0.9, 2.6)             | 0.321   |
|                                                 | Other Polytherapy                       | 39                      | 0.2 (-0.5, 0.8)             | 0.642   | 37                     | -0.1 (-0.8, 0.6)            | 0.773   |
| Age 3                                           | Lamotrigine                             | 94                      | -0.6 (-2.2, 0.9)            | 0.421   | 89                     | -1.1 (-2.7, 0.6)            | 0.215   |
|                                                 | Levetiracetam                           | 75                      | 2.4 (0.6, 4.3)              | 0.010   | 68                     | 2.2 (0.4, 4.0)              | 0.019   |
|                                                 | Other Monotherapy                       | 45                      | -1.0 (-3.3, 1.3)            | 0.396   | 42                     | -2.5 (-5.1, 0.1)            | 0.063   |
|                                                 | Lamotrigine+ Levetiracetam              | 26                      | -1.2 (-4.2, 1.8)            | 0.441   | 25                     | -0.3 (-2.7, 2.0)            | 0.774   |
|                                                 | Other Polytherapy                       | 37                      | 0.5 (-0.5, 1.5)             | 0.362   | 36                     | 0.2 (-0.9, 1.3)             | 0.764   |
| Age 4.5                                         | Lamotrigine                             | 78                      | -0.6 (-2.4, 1.3)            | 0.556   | 76                     | -1.0 (-2.9, 0.9)            | 0.293   |
|                                                 | Levetiracetam                           | 72                      | 1.5 (-0.7, 3.7)             | 0.178   | 64                     | 1.2 (-1.1, 3.4)             | 0.308   |
|                                                 | Other Monotherapy                       | 34                      | -3.1 (-6.0, -0.2)           | 0.037   | 32                     | -3.8 (-6.4, -1.1)           | 0.006   |
|                                                 | Lamotrigine+ Levetiracetam              | 24                      | 0.4 (-2.4, 3.1)             | 0.797   | 22                     | 0.2 (-1.9, 2.4)             | 0.822   |

|                                                 |                                         | Unadjusted <sup>b</sup> |                             |         | Adjusted <sup>bc</sup> |                             |         |
|-------------------------------------------------|-----------------------------------------|-------------------------|-----------------------------|---------|------------------------|-----------------------------|---------|
| Child's Age                                     | 3rd Trimester ASM Category <sup>d</sup> | N                       | Parameter Estimate (95% CI) | P-Value | N                      | Parameter Estimate (95% CI) | P-Value |
|                                                 | Other Polytherapy                       | 34                      | -1.4 (-2.7, -0.2)           | 0.028   | 33                     | -1.6 (-3.0, -0.2)           | 0.024   |
| <i>P-Value for Interaction Term<sup>e</sup></i> |                                         | -                       | -                           | 0.697   | -                      | -                           | 0.819   |
| <b>BASC-2 Atypicality Subscale T-Score</b>      |                                         |                         |                             |         |                        |                             |         |
| Age 2                                           | Lamotrigine                             | 96                      | 1.1 (-0.6, 2.7)             | 0.202   | 94                     | 1.1 (-0.6, 2.7)             | 0.209   |
|                                                 | Levetiracetam                           | 71                      | -0.3 (-2.6, 2.1)            | 0.816   | 68                     | -0.2 (-2.5, 2.2)            | 0.882   |
|                                                 | Other Monotherapy                       | 46                      | -1.5 (-4.4, 1.5)            | 0.326   | 44                     | -2.4 (-5.9, 1.2)            | 0.191   |
|                                                 | Lamotrigine+ Levetiracetam              | 29                      | 2.4 (-0.2, 5.0)             | 0.072   | 28                     | 1.2 (-1.2, 3.6)             | 0.335   |
|                                                 | Other Polytherapy                       | 39                      | 1.7 (0.7, 2.7)              | <.001   | 37                     | 1.6 (0.5, 2.7)              | 0.005   |
| Age 3                                           | Lamotrigine                             | 94                      | 0.3 (-1.2, 1.7)             | 0.737   | 89                     | 0.2 (-1.3, 1.8)             | 0.774   |
|                                                 | Levetiracetam                           | 75                      | 1.2 (-1.0, 3.3)             | 0.283   | 68                     | 1.3 (-0.9, 3.5)             | 0.247   |
|                                                 | Other Monotherapy                       | 45                      | -0.9 (-4.7, 2.8)            | 0.633   | 42                     | -1.8 (-6.5, 2.9)            | 0.450   |
|                                                 | Lamotrigine+ Levetiracetam              | 26                      | 2.7 (0.4, 5.0)              | 0.021   | 25                     | 1.4 (-0.3, 3.1)             | 0.118   |
|                                                 | Other Polytherapy                       | 37                      | 0.6 (-0.6, 1.8)             | 0.331   | 36                     | 0.3 (-1.0, 1.6)             | 0.649   |
| Age 4.5                                         | Lamotrigine                             | 78                      | 0.5 (-0.9, 1.9)             | 0.486   | 76                     | 0.4 (-1.0, 1.8)             | 0.594   |
|                                                 | Levetiracetam                           | 72                      | 3.2 (0.4, 5.9)              | 0.023   | 64                     | 3.6 (0.7, 6.4)              | 0.014   |
|                                                 | Other Monotherapy                       | 34                      | -0.4 (-4.5, 3.7)            | 0.842   | 32                     | -1.4 (-5.5, 2.8)            | 0.521   |
|                                                 | Lamotrigine+ Levetiracetam              | 24                      | 1.1 (-1.5, 3.7)             | 0.406   | 22                     | -0.6 (-1.9, 0.8)            | 0.392   |
|                                                 | Other Polytherapy                       | 34                      | 0.0 (-1.2, 1.3)             | 0.952   | 33                     | -0.2 (-1.7, 1.2)            | 0.769   |
| <i>P-Value for Interaction Term<sup>e</sup></i> |                                         | -                       | -                           | 0.221   | -                      | -                           | 0.171   |
| <b>BASC-2 Withdrawal Subscale T-Score</b>       |                                         |                         |                             |         |                        |                             |         |
| Age 2                                           | Lamotrigine                             | 96                      | 0.3 (-1.1, 1.8)             | 0.641   | 94                     | 0.5 (-1.0, 2.0)             | 0.494   |
|                                                 | Levetiracetam                           | 71                      | -0.9 (-2.8, 1.0)            | 0.359   | 68                     | -0.4 (-2.2, 1.4)            | 0.673   |

|                                                   |                                         | Unadjusted <sup>b</sup> |                             |         | Adjusted <sup>bc</sup> |                             |         |
|---------------------------------------------------|-----------------------------------------|-------------------------|-----------------------------|---------|------------------------|-----------------------------|---------|
| Child's Age                                       | 3rd Trimester ASM Category <sup>d</sup> | N                       | Parameter Estimate (95% CI) | P-Value | N                      | Parameter Estimate (95% CI) | P-Value |
|                                                   | Other Monotherapy                       | 46                      | -2.0 (-4.2, 0.2)            | 0.072   | 44                     | -2.9 (-5.7, -0.1)           | 0.039   |
|                                                   | Lamotrigine+ Levetiracetam              | 29                      | 1.9 (-0.4, 4.2)             | 0.108   | 28                     | 1.4 (-1.0, 3.8)             | 0.242   |
|                                                   | Other Polytherapy                       | 39                      | -0.8 (-2.0, 0.4)            | 0.171   | 37                     | -1.2 (-2.4, -0.1)           | 0.039   |
| Age 3                                             | Lamotrigine                             | 94                      | 0.1 (-1.1, 1.2)             | 0.919   | 89                     | 0.3 (-0.9, 1.5)             | 0.656   |
|                                                   | Levetiracetam                           | 74                      | 0.0 (-2.4, 2.4)             | 0.982   | 67                     | 0.4 (-2.1, 2.9)             | 0.728   |
|                                                   | Other Monotherapy                       | 45                      | 1.6 (-1.7, 4.9)             | 0.338   | 42                     | 0.5 (-3.6, 4.5)             | 0.815   |
|                                                   | Lamotrigine+ Levetiracetam              | 26                      | 2.4 (0.9, 4.0)              | 0.002   | 25                     | 2.4 (0.4, 4.4)              | 0.017   |
|                                                   | Other Polytherapy                       | 37                      | 1.2 (-1.0, 3.3)             | 0.291   | 36                     | 0.8 (-1.3, 2.8)             | 0.455   |
| Age 4.5                                           | Lamotrigine                             | 78                      | 0.4 (-1.3, 2.1)             | 0.674   | 76                     | 0.4 (-1.3, 2.1)             | 0.669   |
|                                                   | Levetiracetam                           | 72                      | 1.1 (-1.7, 3.9)             | 0.444   | 64                     | 1.5 (-1.5, 4.5)             | 0.320   |
|                                                   | Other Monotherapy                       | 34                      | 1.1 (-2.9, 5.2)             | 0.578   | 32                     | 0.7 (-3.9, 5.3)             | 0.771   |
|                                                   | Lamotrigine+ Levetiracetam              | 24                      | 0.6 (-1.1, 2.2)             | 0.491   | 22                     | 0.3 (-1.5, 2.2)             | 0.729   |
|                                                   | Other Polytherapy                       | 34                      | 1.1 (-0.2, 2.5)             | 0.102   | 33                     | 0.7 (-0.6, 2.0)             | 0.291   |
| <i>P-Value for Interaction Term<sup>e</sup></i>   |                                         | -                       | -                           | 0.268   | -                      | -                           | 0.371   |
| <b>BASC-2 Attention Problems Subscale T-Score</b> |                                         |                         |                             |         |                        |                             |         |
| Age 2                                             | Lamotrigine                             | 96                      | -0.2 (-1.5, 1.2)            | 0.812   | 94                     | 0.0 (-1.5, 1.5)             | 0.969   |
|                                                   | Levetiracetam                           | 72                      | 2.2 (-0.2, 4.6)             | 0.073   | 69                     | 2.5 (0.1, 4.9)              | 0.039   |
|                                                   | Other Monotherapy                       | 46                      | 1.0 (-2.4, 4.4)             | 0.565   | 44                     | -0.1 (-3.5, 3.3)            | 0.948   |
|                                                   | Lamotrigine+ Levetiracetam              | 29                      | 0.9 (-2.5, 4.2)             | 0.609   | 28                     | -1.3 (-3.8, 1.2)            | 0.318   |
|                                                   | Other Polytherapy                       | 39                      | 0.7 (-0.8, 2.3)             | 0.342   | 37                     | 0.6 (-1.1, 2.4)             | 0.466   |
| Age 3                                             | Lamotrigine                             | 94                      | 0.0 (-1.7, 1.6)             | 0.990   | 89                     | 0.1 (-1.5, 1.8)             | 0.870   |
|                                                   | Levetiracetam                           | 75                      | 3.1 (0.5, 5.6)              | 0.017   | 68                     | 3.5 (1.0, 6.0)              | 0.006   |

|                                                 |                                         | Unadjusted <sup>b</sup> |                             |         | Adjusted <sup>bc</sup> |                             |         |
|-------------------------------------------------|-----------------------------------------|-------------------------|-----------------------------|---------|------------------------|-----------------------------|---------|
| Child's Age                                     | 3rd Trimester ASM Category <sup>d</sup> | N                       | Parameter Estimate (95% CI) | P-Value | N                      | Parameter Estimate (95% CI) | P-Value |
|                                                 | Other Monotherapy                       | 45                      | -0.8 (-4.8, 3.1)            | 0.683   | 42                     | -3.0 (-7.1, 1.1)            | 0.157   |
|                                                 | Lamotrigine+ Levetiracetam              | 26                      | 0.9 (-2.5, 4.3)             | 0.595   | 25                     | -1.2 (-3.9, 1.6)            | 0.403   |
|                                                 | Other Polytherapy                       | 37                      | 0.5 (-0.7, 1.7)             | 0.412   | 36                     | 0.1 (-1.2, 1.3)             | 0.921   |
| Age 4.5                                         | Lamotrigine                             | 78                      | 0.2 (-1.3, 1.6)             | 0.840   | 76                     | 0.2 (-1.3, 1.8)             | 0.752   |
|                                                 | Levetiracetam                           | 72                      | 3.0 (0.5, 5.5)              | 0.018   | 64                     | 3.6 (1.2, 6.0)              | 0.004   |
|                                                 | Other Monotherapy                       | 34                      | -0.7 (-3.7, 2.4)            | 0.675   | 32                     | -2.4 (-5.6, 0.8)            | 0.144   |
|                                                 | Lamotrigine+ Levetiracetam              | 24                      | -0.3 (-3.5, 2.8)            | 0.830   | 22                     | -3.0 (-4.6, -1.5)           | <.001   |
|                                                 | Other Polytherapy                       | 34                      | 1.3 (-0.4, 2.9)             | 0.136   | 33                     | 0.9 (-0.7, 2.5)             | 0.247   |
| <i>P-Value for Interaction Term<sup>e</sup></i> |                                         | -                       | -                           | 0.892   | -                      | -                           | 0.612   |
| <b>BASC-2 Adaptability Subscale T-Score</b>     |                                         |                         |                             |         |                        |                             |         |
| Age 2                                           | Lamotrigine                             | 96                      | -0.8 (-2.1, 0.5)            | 0.225   | 94                     | -0.8 (-2.1, 0.5)            | 0.242   |
|                                                 | Levetiracetam                           | 72                      | -0.4 (-3.0, 2.3)            | 0.773   | 69                     | -0.5 (-3.0, 1.9)            | 0.665   |
|                                                 | Other Monotherapy                       | 46                      | -0.1 (-3.4, 3.2)            | 0.943   | 44                     | 1.2 (-2.5, 4.8)             | 0.533   |
|                                                 | Lamotrigine+ Levetiracetam              | 29                      | 0.4 (-3.6, 4.4)             | 0.846   | 28                     | 1.8 (-0.9, 4.6)             | 0.195   |
|                                                 | Other Polytherapy                       | 39                      | -0.3 (-1.7, 1.0)            | 0.636   | 37                     | 0.3 (-1.1, 1.6)             | 0.711   |
| Age 3                                           | Lamotrigine                             | 94                      | -0.6 (-2.1, 0.9)            | 0.460   | 89                     | -0.4 (-1.9, 1.1)            | 0.567   |
|                                                 | Levetiracetam                           | 75                      | -1.5 (-4.8, 1.7)            | 0.359   | 68                     | -1.8 (-4.7, 1.1)            | 0.226   |
|                                                 | Other Monotherapy                       | 45                      | -1.2 (-4.8, 2.5)            | 0.536   | 42                     | 1.1 (-2.7, 4.9)             | 0.579   |
|                                                 | Lamotrigine+ Levetiracetam              | 26                      | -0.9 (-4.8, 3.1)            | 0.669   | 25                     | 0.3 (-2.9, 3.5)             | 0.843   |
|                                                 | Other Polytherapy                       | 37                      | -0.5 (-2.4, 1.3)            | 0.567   | 36                     | 0.0 (-1.8, 1.8)             | 0.995   |
| Age 4.5                                         | Lamotrigine                             | 78                      | -1.2 (-2.9, 0.5)            | 0.162   | 76                     | -1.2 (-2.9, 0.5)            | 0.169   |
|                                                 | Levetiracetam                           | 72                      | -2.8 (-6.5, 0.8)            | 0.129   | 64                     | -3.3 (-6.8, 0.2)            | 0.064   |

|                                                 |                                         | Unadjusted <sup>b</sup> |                             |         | Adjusted <sup>bc</sup> |                             |         |
|-------------------------------------------------|-----------------------------------------|-------------------------|-----------------------------|---------|------------------------|-----------------------------|---------|
| Child's Age                                     | 3rd Trimester ASM Category <sup>d</sup> | N                       | Parameter Estimate (95% CI) | P-Value | N                      | Parameter Estimate (95% CI) | P-Value |
|                                                 | Other Monotherapy                       | 34                      | 0.8 (-3.1, 4.6)             | 0.697   | 32                     | 2.5 (-1.4, 6.3)             | 0.209   |
|                                                 | Lamotrigine+ Levetiracetam              | 24                      | 0.9 (-3.5, 5.2)             | 0.692   | 22                     | 2.6 (-0.4, 5.6)             | 0.093   |
|                                                 | Other Polytherapy                       | 34                      | 0.2 (-1.0, 1.4)             | 0.689   | 33                     | 0.7 (-0.4, 1.8)             | 0.207   |
| <i>P-Value for Interaction Term<sup>e</sup></i> |                                         | -                       | -                           | 0.534   | -                      | -                           | 0.520   |
| <b>BASC-2 Social Skills Subscale T-Score</b>    |                                         |                         |                             |         |                        |                             |         |
| Age 2                                           | Lamotrigine                             | 96                      | -0.9 (-2.4, 0.7)            | 0.271   | 94                     | -1.1 (-2.7, 0.5)            | 0.191   |
|                                                 | Levetiracetam                           | 72                      | -2.1 (-3.7, -0.5)           | 0.011   | 69                     | -2.3 (-4.0, -0.6)           | 0.006   |
|                                                 | Other Monotherapy                       | 46                      | -0.1 (-3.1, 2.9)            | 0.940   | 44                     | 1.3 (-1.7, 4.3)             | 0.406   |
|                                                 | Lamotrigine+ Levetiracetam              | 29                      | -0.7 (-4.0, 2.6)            | 0.684   | 28                     | 0.0 (-2.8, 2.7)             | 0.977   |
|                                                 | Other Polytherapy                       | 39                      | -0.4 (-1.4, 0.5)            | 0.360   | 37                     | -0.2 (-1.1, 0.7)            | 0.616   |
| Age 3                                           | Lamotrigine                             | 94                      | -1.0 (-2.5, 0.6)            | 0.225   | 89                     | -1.3 (-2.9, 0.3)            | 0.124   |
|                                                 | Levetiracetam                           | 75                      | -2.2 (-4.4, 0.0)            | 0.053   | 68                     | -2.6 (-4.8, -0.4)           | 0.018   |
|                                                 | Other Monotherapy                       | 45                      | -0.6 (-4.0, 2.7)            | 0.709   | 42                     | 1.0 (-2.9, 4.9)             | 0.613   |
|                                                 | Lamotrigine+ Levetiracetam              | 26                      | -1.1 (-4.3, 2.1)            | 0.486   | 25                     | -0.6 (-3.5, 2.4)            | 0.701   |
|                                                 | Other Polytherapy                       | 37                      | -1.1 (-2.5, 0.4)            | 0.141   | 36                     | -0.8 (-2.3, 0.7)            | 0.288   |
| Age 4.5                                         | Lamotrigine                             | 78                      | -0.4 (-2.3, 1.6)            | 0.729   | 76                     | -0.6 (-2.6, 1.5)            | 0.586   |
|                                                 | Levetiracetam                           | 72                      | -3.5 (-6.1, -0.8)           | 0.011   | 64                     | -3.8 (-6.6, -1.1)           | 0.007   |
|                                                 | Other Monotherapy                       | 34                      | 2.3 (-1.4, 6.0)             | 0.222   | 32                     | 4.1 (0.2, 8.0)              | 0.038   |
|                                                 | Lamotrigine+ Levetiracetam              | 24                      | 0.1 (-4.3, 4.5)             | 0.969   | 22                     | 1.1 (-2.5, 4.6)             | 0.558   |
|                                                 | Other Polytherapy                       | 34                      | -1.6 (-3.5, 0.2)            | 0.088   | 33                     | -1.5 (-3.4, 0.3)            | 0.111   |
| <i>P-Value for Interaction Term<sup>e</sup></i> |                                         | -                       | -                           | 0.595   | -                      | -                           | 0.535   |

|             |                                         | Unadjusted <sup>b</sup> |                             |         | Adjusted <sup>bc</sup> |                             |         |
|-------------|-----------------------------------------|-------------------------|-----------------------------|---------|------------------------|-----------------------------|---------|
| Child's Age | 3rd Trimester ASM Category <sup>d</sup> | N                       | Parameter Estimate (95% CI) | P-Value | N                      | Parameter Estimate (95% CI) | P-Value |

N = children of WWE on ASM in 3rd trimester with non-missing behavior score. Children with missing covariates excluded from adjusted model.

<sup>a</sup> Ratio DDD = Ratio Defined Daily Dose, calculated by dividing the mother's ASM total prescribed daily dose by the WHO defined daily dose values. For mothers on polytherapy, ratio DDD equals the sum across the ratio DDD for all ASMs. Maximum ratio DDD during 3rd trimester used for analysis.

<sup>b</sup> Parameter Estimate and P-Value from a longitudinal generalized linear model with identity link function and generalized estimating equations and unstructured covariance structure including mother's max ratio DDD in 3rd trimester, ASM category, child's age, their interaction, and all lower order interactions. Mother's ASM group was not included as a covariate in model.

<sup>c</sup> Adjusted for mother's IQ, education level, age at enrollment, smoking during pregnancy, post-birth average BAI score through child's 2YO visit, McMaster FAD problematic family functioning at child's 2YO Visit, and child's sex and small for gestational age status.

<sup>d</sup> Based on ASM regimen taken at time of maximum ratio DDD during 3rd trimester.

<sup>e</sup> P-value for the interaction between max ratio DDD in 3rd trimester, ASM category, and child's age calculated using the Score test. If significant, the association between max ratio DDD in 3rd trimester and behavior score differs among child's age and ASM category.

**eTable 24.** Categorical Behavior Scores by Mother’s Study Group and Child’s Age, Children of WWE vs WWoE, Completers Population

|                                                     | Children of WWE |          | Children of WWoE |         | Children of WWE vs WWoE <sup>a</sup> |         |
|-----------------------------------------------------|-----------------|----------|------------------|---------|--------------------------------------|---------|
| Child's Age                                         | N               | n (%)    | N                | n (%)   | Odds Ratio (95% CI)                  | P-Value |
| <b>Intellectual Disability</b>                      |                 |          |                  |         |                                      |         |
| Age 3                                               | 278             | 1 (0.4)  | 78               | 0 (0.0) | -                                    | -       |
| <b>Expressive Language Disorder</b>                 |                 |          |                  |         |                                      |         |
| Age 3                                               | 275             | 12 (4.4) | 79               | 1 (1.3) | 3.6 (0.5, 154.1)                     | 0.312   |
| <b>Receptive Language Disorder</b>                  |                 |          |                  |         |                                      |         |
| Age 3                                               | 275             | 9 (3.3)  | 76               | 1 (1.3) | 2.5 (0.3, 112.7)                     | 0.696   |
| <b>Mixed Expressive/Receptive Language Disorder</b> |                 |          |                  |         |                                      |         |
| Age 3                                               | 274             | 8 (2.9)  | 76               | 1 (1.3) | 2.3 (0.3, 101.4)                     | 0.690   |
| <b>BASC-2 Inattentive Presentation ADHD</b>         |                 |          |                  |         |                                      |         |
| Age 2                                               | 296             | 11 (3.7) | 90               | 2 (2.2) | 1.7 (0.4, 16.0)                      | 0.741   |
| Age 3                                               | 291             | 8 (2.7)  | 83               | 0 (0.0) | -                                    | -       |
| Age 4.5                                             | 256             | 15 (5.9) | 74               | 5 (6.8) | 0.9 (0.3, 3.1)                       | 0.784   |
| <b>BASC-2 Combined Presentation ADHD</b>            |                 |          |                  |         |                                      |         |
| Age 2                                               | 296             | 4 (1.4)  | 90               | 1 (1.1) | 1.2 (0.1, 60.7)                      | 1.000   |
| Age 3                                               | 291             | 4 (1.4)  | 83               | 0 (0.0) | -                                    | -       |
| Age 4.5                                             | 256             | 10 (3.9) | 74               | 3 (4.1) | 1.0 (0.2, 5.6)                       | 1.000   |
| <b>Autism Spectrum Disorder</b>                     |                 |          |                  |         |                                      |         |
| Age 2                                               | 306             | 12 (3.9) | 91               | 1 (1.1) | 3.7 (0.5, 158.8)                     | 0.314   |
| Age 3                                               | 287             | 16 (5.6) | 81               | 4 (4.9) | 1.1 (0.4, 4.8)                       | 1.000   |
| Age 4.5                                             | 257             | 7 (2.7)  | 74               | 4 (5.4) | 0.5 (0.1, 2.4)                       | 0.273   |
| <b>PSI-4 Parent Domain At-Risk Score</b>            |                 |          |                  |         |                                      |         |
| Age 2                                               | 297             | 2 (0.7)  | 89               | 1 (1.1) | 0.6 (0.0, 35.6)                      | 0.546   |
| Age 3                                               | 286             | 4 (1.4)  | 80               | 0 (0.0) | -                                    | -       |

|                                              | Children of WWE |           | Children of WWoE |          | Children of WWE vs WWoE <sup>a</sup> |         |
|----------------------------------------------|-----------------|-----------|------------------|----------|--------------------------------------|---------|
| Child's Age                                  | N               | n (%)     | N                | n (%)    | Odds Ratio (95% CI)                  | P-Value |
| Age 4.5                                      | 253             | 3 (1.2)   | 74               | 1 (1.4)  | 0.9 (0.1, 46.6)                      | 1.000   |
| <b>PSI-4 Child Domain At-Risk Score</b>      |                 |           |                  |          |                                      |         |
| Age 2                                        | 299             | 4 (1.3)   | 89               | 1 (1.1)  | 1.2 (0.1, 59.4)                      | 1.000   |
| Age 3                                        | 286             | 3 (1.0)   | 80               | 0 (0.0)  | -                                    | -       |
| Age 4.5                                      | 254             | 1 (0.4)   | 74               | 4 (5.4)  | 0.1 (0.0, 0.7)                       | 0.010   |
| <b>PSI-4 Distractibility At-Risk Score</b>   |                 |           |                  |          |                                      |         |
| Age 2                                        | 299             | 38 (12.7) | 89               | 4 (4.5)  | 3.1 (1.1, 12.3)                      | 0.031   |
| Age 3                                        | 286             | 13 (4.5)  | 81               | 3 (3.7)  | 1.2 (0.3, 6.9)                       | 1.000   |
| Age 4.5                                      | 254             | 16 (6.3)  | 74               | 5 (6.8)  | 0.9 (0.3, 3.4)                       | 1.000   |
| <b>PSI-4 Adaptability At-Risk Score</b>      |                 |           |                  |          |                                      |         |
| Age 2                                        | 299             | 9 (3.0)   | 89               | 3 (3.4)  | 0.9 (0.2, 5.2)                       | 1.000   |
| Age 3                                        | 286             | 8 (2.8)   | 81               | 1 (1.2)  | 2.3 (0.3, 103.4)                     | 0.690   |
| Age 4.5                                      | 254             | 7 (2.8)   | 74               | 5 (6.8)  | 0.4 (0.1, 1.6)                       | 0.151   |
| <b>PSI-4 Reinforces Parent At-Risk Score</b> |                 |           |                  |          |                                      |         |
| Age 2                                        | 299             | 0 (0.0)   | 89               | 0 (0.0)  | -                                    | -       |
| Age 3                                        | 286             | 3 (1.0)   | 81               | 0 (0.0)  | -                                    | -       |
| Age 4.5                                      | 254             | 2 (0.8)   | 74               | 0 (0.0)  | -                                    | -       |
| <b>PSI-4 Demandingness At-Risk Score</b>     |                 |           |                  |          |                                      |         |
| Age 2                                        | 299             | 11 (3.7)  | 89               | 3 (3.4)  | 1.1 (0.3, 6.2)                       | 1.000   |
| Age 3                                        | 286             | 9 (3.1)   | 81               | 1 (1.2)  | 2.6 (0.4, 115.3)                     | 0.698   |
| Age 4.5                                      | 254             | 3 (1.2)   | 74               | 3 (4.1)  | 0.3 (0.0, 2.2)                       | 0.131   |
| <b>PSI-4 Mood At-Risk Score</b>              |                 |           |                  |          |                                      |         |
| Age 2                                        | 299             | 23 (7.7)  | 89               | 9 (10.1) | 0.7 (0.3, 1.9)                       | 0.510   |
| Age 3                                        | 286             | 11 (3.8)  | 81               | 2 (2.5)  | 1.6 (0.3, 14.9)                      | 0.741   |



|                                                | Children of WWE |           | Children of WWoE |           | Children of WWE vs WWoE <sup>a</sup> |         |
|------------------------------------------------|-----------------|-----------|------------------|-----------|--------------------------------------|---------|
| Child's Age                                    | N               | n (%)     | N                | n (%)     | Odds Ratio (95% CI)                  | P-Value |
| Age 4.5                                        | 254             | 9 (3.5)   | 74               | 7 (9.5)   | 0.4 (0.1, 1.2)                       | 0.060   |
| <b>PSI-4 Acceptability At-Risk Score</b>       |                 |           |                  |           |                                      |         |
| Age 2                                          | 299             | 0 (0.0)   | 89               | 1 (1.1)   | -                                    | -       |
| Age 3                                          | 286             | 4 (1.4)   | 80               | 0 (0.0)   | -                                    | -       |
| Age 4.5                                        | 254             | 0 (0.0)   | 74               | 0 (0.0)   | -                                    | -       |
| <b>PSI-4 Competence At-Risk Score</b>          |                 |           |                  |           |                                      |         |
| Age 2                                          | 299             | 1 (0.3)   | 89               | 1 (1.1)   | 0.3 (0.0, 23.4)                      | 0.407   |
| Age 3                                          | 286             | 6 (2.1)   | 80               | 0 (0.0)   | -                                    | -       |
| Age 4.5                                        | 254             | 1 (0.4)   | 74               | 1 (1.4)   | 0.3 (0.0, 23.0)                      | 0.401   |
| <b>PSI-4 Isolation At-Risk Score</b>           |                 |           |                  |           |                                      |         |
| Age 2                                          | 297             | 14 (4.7)  | 89               | 1 (1.1)   | 4.4 (0.6, 186.1)                     | 0.208   |
| Age 3                                          | 286             | 13 (4.5)  | 81               | 0 (0.0)   | -                                    | -       |
| Age 4.5                                        | 254             | 24 (9.4)  | 74               | 4 (5.4)   | 1.8 (0.6, 7.5)                       | 0.349   |
| <b>PSI-4 Attachment At-Risk Score</b>          |                 |           |                  |           |                                      |         |
| Age 2                                          | 297             | 2 (0.7)   | 89               | 1 (1.1)   | 0.6 (0.0, 35.6)                      | 0.546   |
| Age 3                                          | 286             | 2 (0.7)   | 81               | 1 (1.2)   | 0.6 (0.0, 33.6)                      | 0.528   |
| Age 4.5                                        | 254             | 1 (0.4)   | 74               | 0 (0.0)   | -                                    | -       |
| <b>PSI-4 Health At-Risk Score</b>              |                 |           |                  |           |                                      |         |
| Age 2                                          | 297             | 20 (6.7)  | 89               | 6 (6.7)   | 1.0 (0.4, 3.1)                       | 1.000   |
| Age 3                                          | 286             | 18 (6.3)  | 81               | 2 (2.5)   | 2.7 (0.6, 24.0)                      | 0.268   |
| Age 4.5                                        | 254             | 41 (16.1) | 74               | 11 (14.9) | 1.1 (0.5, 2.5)                       | 0.858   |
| <b>PSI-4 Restriction of Role At-Risk Score</b> |                 |           |                  |           |                                      |         |
| Age 2                                          | 297             | 29 (9.8)  | 89               | 8 (9.0)   | 1.1 (0.5, 2.9)                       | 1.000   |
| Age 3                                          | 286             | 22 (7.7)  | 81               | 4 (4.9)   | 1.6 (0.5, 6.6)                       | 0.472   |

|                                                   | Children of WWE |          | Children of WWoE |         | Children of WWE vs WWoE <sup>a</sup> |         |
|---------------------------------------------------|-----------------|----------|------------------|---------|--------------------------------------|---------|
| Child's Age                                       | N               | n (%)    | N                | n (%)   | Odds Ratio (95% CI)                  | P-Value |
| Age 4.5                                           | 254             | 12 (4.7) | 74               | 3 (4.1) | 1.2 (0.3, 6.7)                       | 1.000   |
| <b>PSI-4 Depression At-Risk Score</b>             |                 |          |                  |         |                                      |         |
| Age 2                                             | 297             | 12 (4.0) | 89               | 3 (3.4) | 1.2 (0.3, 6.8)                       | 1.000   |
| Age 3                                             | 286             | 14 (4.9) | 81               | 1 (1.2) | 4.1 (0.6, 176.3)                     | 0.207   |
| Age 4.5                                           | 254             | 16 (6.3) | 74               | 2 (2.7) | 2.4 (0.5, 22.1)                      | 0.383   |
| <b>PSI-4 Relationship to Spouse At-Risk Score</b> |                 |          |                  |         |                                      |         |
| Age 2                                             | 297             | 13 (4.4) | 89               | 2 (2.2) | 2.0 (0.4, 18.5)                      | 0.536   |
| Age 3                                             | 286             | 18 (6.3) | 81               | 4 (4.9) | 1.3 (0.4, 5.4)                       | 0.795   |
| Age 4.5                                           | 252             | 13 (5.2) | 74               | 6 (8.1) | 0.6 (0.2, 2.1)                       | 0.396   |
| <b>PSI-4 Life Stress At-Risk Score</b>            |                 |          |                  |         |                                      |         |
| Age 2                                             | 297             | 5 (1.7)  | 88               | 3 (3.4) | 0.5 (0.1, 3.2)                       | 0.390   |
| Age 3                                             | 285             | 5 (1.8)  | 80               | 3 (3.8) | 0.5 (0.1, 3.0)                       | 0.380   |
| Age 4.5                                           | 254             | 3 (1.2)  | 72               | 2 (2.8) | 0.4 (0.0, 5.1)                       | 0.306   |

N = children with non-missing behavior score. n (%) = number and percentage of children with disability/disorder/at-risk score.

<sup>a</sup> Odds of having disability/disorder/at-risk score. Odds Ratio (95% CI) and P-Value from Fisher's Exact Test at each age.

**eTable 25.** Categorical Behavior Scores by Mother's ASM Category, Children of WWE With 3rd Trimester Blood Levels, Completers Population

| Child's Age                                         | Mother's ASM Category <sup>a</sup> |         |               |         |                   |         |                            |         |                   |          |          |          |
|-----------------------------------------------------|------------------------------------|---------|---------------|---------|-------------------|---------|----------------------------|---------|-------------------|----------|----------|----------|
|                                                     | Lamotrigine                        |         | Levetiracetam |         | Other Monotherapy |         | Lamotrigine+ Levetiracetam |         | Other Polytherapy |          | All ASMs |          |
|                                                     | N                                  | n (%)   | N             | n (%)   | N                 | n (%)   | N                          | n (%)   | N                 | n (%)    | N        | n (%)    |
| <b>Intellectual Disability</b>                      |                                    |         |               |         |                   |         |                            |         |                   |          |          |          |
| Age 3                                               | 89                                 | 0 (0.0) | 69            | 0 (0.0) | 39                | 1 (2.6) | 24                         | 0 (0.0) | 27                | 0 (0.0)  | 248      | 1 (0.4)  |
| <b>Expressive Language Disorder</b>                 |                                    |         |               |         |                   |         |                            |         |                   |          |          |          |
| Age 3                                               | 88                                 | 3 (3.4) | 67            | 4 (6.0) | 39                | 1 (2.6) | 24                         | 2 (8.3) | 27                | 0 (0.0)  | 245      | 10 (4.1) |
| <b>Receptive Language Disorder</b>                  |                                    |         |               |         |                   |         |                            |         |                   |          |          |          |
| Age 3                                               | 88                                 | 2 (2.3) | 67            | 2 (3.0) | 39                | 1 (2.6) | 24                         | 2 (8.3) | 27                | 1 (3.7)  | 245      | 8 (3.3)  |
| <b>Mixed Expressive/Receptive Language Disorder</b> |                                    |         |               |         |                   |         |                            |         |                   |          |          |          |
| Age 3                                               | 87                                 | 2 (2.3) | 67            | 2 (3.0) | 39                | 1 (2.6) | 24                         | 2 (8.3) | 27                | 0 (0.0)  | 244      | 7 (2.9)  |
| <b>BASC-2 Inattentive Presentation ADHD</b>         |                                    |         |               |         |                   |         |                            |         |                   |          |          |          |
| Age 2                                               | 96                                 | 4 (4.2) | 71            | 1 (1.4) | 44                | 2 (4.5) | 27                         | 0 (0.0) | 27                | 3 (11.1) | 265      | 10 (3.8) |
| Age 3                                               | 94                                 | 2 (2.1) | 74            | 3 (4.1) | 41                | 1 (2.4) | 24                         | 0 (0.0) | 27                | 1 (3.7)  | 260      | 7 (2.7)  |
| Age 4.5                                             | 79                                 | 4 (5.1) | 71            | 5 (7.0) | 33                | 0 (0.0) | 24                         | 2 (8.3) | 25                | 2 (8.0)  | 232      | 13 (5.6) |
| <b>BASC-2 Combined Presentation ADHD</b>            |                                    |         |               |         |                   |         |                            |         |                   |          |          |          |
| Age 2                                               | 96                                 | 2 (2.1) | 71            | 1 (1.4) | 44                | 0 (0.0) | 27                         | 0 (0.0) | 27                | 0 (0.0)  | 265      | 3 (1.1)  |
| Age 3                                               | 94                                 | 1 (1.1) | 74            | 1 (1.4) | 41                | 1 (2.4) | 24                         | 0 (0.0) | 27                | 0 (0.0)  | 260      | 3 (1.2)  |
| Age 4.5                                             | 79                                 | 3 (3.8) | 71            | 3 (4.2) | 33                | 0 (0.0) | 24                         | 1 (4.2) | 25                | 1 (4.0)  | 232      | 8 (3.4)  |
| <b>Autism Spectrum Disorder</b>                     |                                    |         |               |         |                   |         |                            |         |                   |          |          |          |
| Age 2                                               | 99                                 | 3 (3.0) | 73            | 1 (1.4) | 44                | 4 (9.1) | 27                         | 0 (0.0) | 28                | 2 (7.1)  | 271      | 10 (3.7) |
| Age 3                                               | 92                                 | 3 (3.3) | 73            | 4 (5.5) | 41                | 1 (2.4) | 24                         | 2 (8.3) | 27                | 2 (7.4)  | 257      | 12 (4.7) |
| Age 4.5                                             | 81                                 | 0 (0.0) | 71            | 2 (2.8) | 33                | 1 (3.0) | 24                         | 0 (0.0) | 25                | 2 (8.0)  | 234      | 5 (2.1)  |

| Child's Age                                  | Mother's ASM Category <sup>a</sup> |           |               |         |                   |          |                            |          |                   |          |          |           |
|----------------------------------------------|------------------------------------|-----------|---------------|---------|-------------------|----------|----------------------------|----------|-------------------|----------|----------|-----------|
|                                              | Lamotrigine                        |           | Levetiracetam |         | Other Monotherapy |          | Lamotrigine+ Levetiracetam |          | Other Polytherapy |          | All ASMs |           |
|                                              | N                                  | n (%)     | N             | n (%)   | N                 | n (%)    | N                          | n (%)    | N                 | n (%)    | N        | n (%)     |
| <b>PSI-4 Parent Domain At-Risk Score</b>     |                                    |           |               |         |                   |          |                            |          |                   |          |          |           |
| Age 2                                        | 95                                 | 0 (0.0)   | 72            | 0 (0.0) | 43                | 0 (0.0)  | 26                         | 2 (7.7)  | 28                | 0 (0.0)  | 264      | 2 (0.8)   |
| Age 3                                        | 92                                 | 0 (0.0)   | 70            | 1 (1.4) | 42                | 0 (0.0)  | 24                         | 0 (0.0)  | 27                | 3 (11.1) | 255      | 4 (1.6)   |
| Age 4.5                                      | 80                                 | 1 (1.3)   | 69            | 0 (0.0) | 33                | 0 (0.0)  | 23                         | 1 (4.3)  | 25                | 1 (4.0)  | 230      | 3 (1.3)   |
| <b>PSI-4 Child Domain At-Risk Score</b>      |                                    |           |               |         |                   |          |                            |          |                   |          |          |           |
| Age 2                                        | 97                                 | 1 (1.0)   | 72            | 1 (1.4) | 43                | 0 (0.0)  | 26                         | 1 (3.8)  | 28                | 1 (3.6)  | 266      | 4 (1.5)   |
| Age 3                                        | 92                                 | 0 (0.0)   | 70            | 1 (1.4) | 42                | 1 (2.4)  | 24                         | 0 (0.0)  | 27                | 1 (3.7)  | 255      | 3 (1.2)   |
| Age 4.5                                      | 80                                 | 0 (0.0)   | 69            | 0 (0.0) | 33                | 0 (0.0)  | 24                         | 1 (4.2)  | 25                | 0 (0.0)  | 231      | 1 (0.4)   |
| <b>PSI-4 Distractibility At-Risk Score</b>   |                                    |           |               |         |                   |          |                            |          |                   |          |          |           |
| Age 2                                        | 97                                 | 12 (12.4) | 72            | 5 (6.9) | 43                | 5 (11.6) | 26                         | 5 (19.2) | 28                | 7 (25.0) | 266      | 34 (12.8) |
| Age 3                                        | 92                                 | 4 (4.3)   | 70            | 2 (2.9) | 42                | 1 (2.4)  | 24                         | 1 (4.2)  | 27                | 1 (3.7)  | 255      | 9 (3.5)   |
| Age 4.5                                      | 80                                 | 4 (5.0)   | 69            | 6 (8.7) | 33                | 0 (0.0)  | 24                         | 3 (12.5) | 25                | 0 (0.0)  | 231      | 13 (5.6)  |
| <b>PSI-4 Adaptability At-Risk Score</b>      |                                    |           |               |         |                   |          |                            |          |                   |          |          |           |
| Age 2                                        | 97                                 | 3 (3.1)   | 72            | 2 (2.8) | 43                | 2 (4.7)  | 26                         | 1 (3.8)  | 28                | 0 (0.0)  | 266      | 8 (3.0)   |
| Age 3                                        | 92                                 | 0 (0.0)   | 70            | 4 (5.7) | 42                | 1 (2.4)  | 24                         | 1 (4.2)  | 27                | 2 (7.4)  | 255      | 8 (3.1)   |
| Age 4.5                                      | 80                                 | 1 (1.3)   | 69            | 3 (4.3) | 33                | 1 (3.0)  | 24                         | 1 (4.2)  | 25                | 1 (4.0)  | 231      | 7 (3.0)   |
| <b>PSI-4 Reinforces Parent At-Risk Score</b> |                                    |           |               |         |                   |          |                            |          |                   |          |          |           |
| Age 2                                        | 97                                 | 0 (0.0)   | 72            | 0 (0.0) | 43                | 0 (0.0)  | 26                         | 0 (0.0)  | 28                | 0 (0.0)  | 266      | 0 (0.0)   |
| Age 3                                        | 92                                 | 0 (0.0)   | 70            | 1 (1.4) | 42                | 1 (2.4)  | 24                         | 0 (0.0)  | 27                | 1 (3.7)  | 255      | 3 (1.2)   |
| Age 4.5                                      | 80                                 | 0 (0.0)   | 69            | 1 (1.4) | 33                | 0 (0.0)  | 24                         | 1 (4.2)  | 25                | 0 (0.0)  | 231      | 2 (0.9)   |
| <b>PSI-4 Demandingness At-Risk Score</b>     |                                    |           |               |         |                   |          |                            |          |                   |          |          |           |
| Age 2                                        | 97                                 | 1 (1.0)   | 72            | 1 (1.4) | 43                | 0 (0.0)  | 26                         | 3 (11.5) | 28                | 3 (10.7) | 266      | 8 (3.0)   |

| Child's Age                              | Mother's ASM Category <sup>a</sup> |         |               |          |                   |          |                            |          |                   |          |          |          |
|------------------------------------------|------------------------------------|---------|---------------|----------|-------------------|----------|----------------------------|----------|-------------------|----------|----------|----------|
|                                          | Lamotrigine                        |         | Levetiracetam |          | Other Monotherapy |          | Lamotrigine+ Levetiracetam |          | Other Polytherapy |          | All ASMs |          |
|                                          | N                                  | n (%)   | N             | n (%)    | N                 | n (%)    | N                          | n (%)    | N                 | n (%)    | N        | n (%)    |
| Age 3                                    | 92                                 | 0 (0.0) | 70            | 4 (5.7)  | 42                | 2 (4.8)  | 24                         | 0 (0.0)  | 27                | 1 (3.7)  | 255      | 7 (2.7)  |
| Age 4.5                                  | 80                                 | 1 (1.3) | 69            | 0 (0.0)  | 33                | 0 (0.0)  | 24                         | 1 (4.2)  | 25                | 1 (4.0)  | 231      | 3 (1.3)  |
| <b>PSI-4 Mood At-Risk Score</b>          |                                    |         |               |          |                   |          |                            |          |                   |          |          |          |
| Age 2                                    | 97                                 | 5 (5.2) | 72            | 6 (8.3)  | 43                | 3 (7.0)  | 26                         | 6 (23.1) | 28                | 1 (3.6)  | 266      | 21 (7.9) |
| Age 3                                    | 92                                 | 2 (2.2) | 70            | 6 (8.6)  | 42                | 2 (4.8)  | 24                         | 0 (0.0)  | 27                | 0 (0.0)  | 255      | 10 (3.9) |
| Age 4.5                                  | 80                                 | 2 (2.5) | 69            | 3 (4.3)  | 33                | 0 (0.0)  | 24                         | 2 (8.3)  | 25                | 0 (0.0)  | 231      | 7 (3.0)  |
| <b>PSI-4 Acceptability At-Risk Score</b> |                                    |         |               |          |                   |          |                            |          |                   |          |          |          |
| Age 2                                    | 97                                 | 0 (0.0) | 72            | 0 (0.0)  | 43                | 0 (0.0)  | 26                         | 0 (0.0)  | 28                | 0 (0.0)  | 266      | 0 (0.0)  |
| Age 3                                    | 92                                 | 0 (0.0) | 70            | 2 (2.9)  | 42                | 1 (2.4)  | 24                         | 0 (0.0)  | 27                | 1 (3.7)  | 255      | 4 (1.6)  |
| Age 4.5                                  | 80                                 | 0 (0.0) | 69            | 0 (0.0)  | 33                | 0 (0.0)  | 24                         | 0 (0.0)  | 25                | 0 (0.0)  | 231      | 0 (0.0)  |
| <b>PSI-4 Competence At-Risk Score</b>    |                                    |         |               |          |                   |          |                            |          |                   |          |          |          |
| Age 2                                    | 97                                 | 0 (0.0) | 72            | 0 (0.0)  | 43                | 0 (0.0)  | 26                         | 1 (3.8)  | 28                | 0 (0.0)  | 266      | 1 (0.4)  |
| Age 3                                    | 92                                 | 0 (0.0) | 70            | 1 (1.4)  | 42                | 1 (2.4)  | 24                         | 1 (4.2)  | 27                | 3 (11.1) | 255      | 6 (2.4)  |
| Age 4.5                                  | 80                                 | 0 (0.0) | 69            | 0 (0.0)  | 33                | 0 (0.0)  | 24                         | 1 (4.2)  | 25                | 0 (0.0)  | 231      | 1 (0.4)  |
| <b>PSI-4 Isolation At-Risk Score</b>     |                                    |         |               |          |                   |          |                            |          |                   |          |          |          |
| Age 2                                    | 95                                 | 1 (1.1) | 72            | 3 (4.2)  | 43                | 0 (0.0)  | 26                         | 2 (7.7)  | 28                | 4 (14.3) | 264      | 10 (3.8) |
| Age 3                                    | 92                                 | 0 (0.0) | 70            | 5 (7.1)  | 42                | 0 (0.0)  | 24                         | 2 (8.3)  | 27                | 2 (7.4)  | 255      | 9 (3.5)  |
| Age 4.5                                  | 80                                 | 2 (2.5) | 69            | 7 (10.1) | 33                | 4 (12.1) | 24                         | 5 (20.8) | 25                | 3 (12.0) | 231      | 21 (9.1) |
| <b>PSI-4 Attachment At-Risk Score</b>    |                                    |         |               |          |                   |          |                            |          |                   |          |          |          |
| Age 2                                    | 95                                 | 0 (0.0) | 72            | 1 (1.4)  | 43                | 0 (0.0)  | 26                         | 0 (0.0)  | 28                | 1 (3.6)  | 264      | 2 (0.8)  |
| Age 3                                    | 92                                 | 0 (0.0) | 70            | 1 (1.4)  | 42                | 0 (0.0)  | 24                         | 0 (0.0)  | 27                | 1 (3.7)  | 255      | 2 (0.8)  |
| Age 4.5                                  | 80                                 | 0 (0.0) | 69            | 0 (0.0)  | 33                | 0 (0.0)  | 24                         | 1 (4.2)  | 25                | 0 (0.0)  | 231      | 1 (0.4)  |

| Child's Age                                       | Mother's ASM Category <sup>a</sup> |          |               |           |                   |          |                            |          |                   |          |     | All ASMs  |  |
|---------------------------------------------------|------------------------------------|----------|---------------|-----------|-------------------|----------|----------------------------|----------|-------------------|----------|-----|-----------|--|
|                                                   | Lamotrigine                        |          | Levetiracetam |           | Other Monotherapy |          | Lamotrigine+ Levetiracetam |          | Other Polytherapy |          |     |           |  |
|                                                   | N                                  | n (%)    | N             | n (%)     | N                 | n (%)    | N                          | n (%)    | N                 | n (%)    | N   | n (%)     |  |
| <b>PSI-4 Health At-Risk Score</b>                 |                                    |          |               |           |                   |          |                            |          |                   |          |     |           |  |
| Age 2                                             | 95                                 | 3 (3.2)  | 72            | 6 (8.3)   | 43                | 3 (7.0)  | 26                         | 3 (11.5) | 28                | 3 (10.7) | 264 | 18 (6.8)  |  |
| Age 3                                             | 92                                 | 2 (2.2)  | 70            | 4 (5.7)   | 42                | 3 (7.1)  | 24                         | 4 (16.7) | 27                | 4 (14.8) | 255 | 17 (6.7)  |  |
| Age 4.5                                           | 80                                 | 8 (10.0) | 69            | 16 (23.2) | 33                | 4 (12.1) | 24                         | 3 (12.5) | 25                | 5 (20.0) | 231 | 36 (15.6) |  |
| <b>PSI-4 Restriction of Role At-Risk Score</b>    |                                    |          |               |           |                   |          |                            |          |                   |          |     |           |  |
| Age 2                                             | 95                                 | 7 (7.4)  | 72            | 6 (8.3)   | 43                | 2 (4.7)  | 26                         | 5 (19.2) | 28                | 7 (25.0) | 264 | 27 (10.2) |  |
| Age 3                                             | 92                                 | 5 (5.4)  | 70            | 7 (10.0)  | 42                | 0 (0.0)  | 24                         | 3 (12.5) | 27                | 4 (14.8) | 255 | 19 (7.5)  |  |
| Age 4.5                                           | 80                                 | 2 (2.5)  | 69            | 1 (1.4)   | 33                | 0 (0.0)  | 24                         | 2 (8.3)  | 25                | 4 (16.0) | 231 | 9 (3.9)   |  |
| <b>PSI-4 Depression At-Risk Score</b>             |                                    |          |               |           |                   |          |                            |          |                   |          |     |           |  |
| Age 2                                             | 95                                 | 3 (3.2)  | 72            | 4 (5.6)   | 43                | 0 (0.0)  | 26                         | 4 (15.4) | 28                | 0 (0.0)  | 264 | 11 (4.2)  |  |
| Age 3                                             | 92                                 | 3 (3.3)  | 70            | 5 (7.1)   | 42                | 1 (2.4)  | 24                         | 1 (4.2)  | 27                | 3 (11.1) | 255 | 13 (5.1)  |  |
| Age 4.5                                           | 80                                 | 4 (5.0)  | 69            | 5 (7.2)   | 33                | 1 (3.0)  | 24                         | 3 (12.5) | 25                | 2 (8.0)  | 231 | 15 (6.5)  |  |
| <b>PSI-4 Relationship to Spouse At-Risk Score</b> |                                    |          |               |           |                   |          |                            |          |                   |          |     |           |  |
| Age 2                                             | 95                                 | 6 (6.3)  | 72            | 2 (2.8)   | 43                | 0 (0.0)  | 26                         | 3 (11.5) | 28                | 1 (3.6)  | 264 | 12 (4.5)  |  |
| Age 3                                             | 92                                 | 8 (8.7)  | 70            | 3 (4.3)   | 42                | 2 (4.8)  | 24                         | 1 (4.2)  | 27                | 3 (11.1) | 255 | 17 (6.7)  |  |
| Age 4.5                                           | 79                                 | 5 (6.3)  | 69            | 1 (1.4)   | 33                | 2 (6.1)  | 23                         | 1 (4.3)  | 25                | 4 (16.0) | 229 | 13 (5.7)  |  |
| <b>PSI-4 Life Stress At-Risk Score</b>            |                                    |          |               |           |                   |          |                            |          |                   |          |     |           |  |
| Age 2                                             | 95                                 | 2 (2.1)  | 72            | 0 (0.0)   | 43                | 1 (2.3)  | 26                         | 2 (7.7)  | 28                | 0 (0.0)  | 264 | 5 (1.9)   |  |
| Age 3                                             | 92                                 | 0 (0.0)  | 70            | 3 (4.3)   | 41                | 0 (0.0)  | 24                         | 0 (0.0)  | 27                | 0 (0.0)  | 254 | 3 (1.2)   |  |
| Age 4.5                                           | 80                                 | 0 (0.0)  | 69            | 1 (1.4)   | 33                | 0 (0.0)  | 24                         | 1 (4.2)  | 25                | 1 (4.0)  | 231 | 3 (1.3)   |  |

Notes: N = children with non-missing behavior score by ASM category. n = number and percent of children with disability/disorder/at-risk score within each ASM category.

<sup>a</sup> ASM at time of maximum observed 3rd trimester ratio ASM concentration (includes day of delivery).

**eTable 26.** Demographic, Baseline Characteristics, and Risk Factors for Children Included vs Excluded From Primary Analysis 1, Categorical Variables, Children in Primary Analysis 1, N = 451

|                                               | <b>Children Included,<br/>N = 386</b> | <b>Children Excluded,<br/>N = 65</b> |                            |
|-----------------------------------------------|---------------------------------------|--------------------------------------|----------------------------|
|                                               | <b>n (%)</b>                          | <b>n (%)</b>                         | <b>P-Value<sup>a</sup></b> |
| <b>Mother's Study Group</b>                   |                                       |                                      | 0.040                      |
| WWE                                           | 302 (78.2)                            | 43 (66.2)                            |                            |
| WWoE                                          | 84 (21.8)                             | 22 (33.8)                            |                            |
| <b>Child's Sex</b>                            |                                       |                                      | 1.000                      |
| Female                                        | 198 (51.3)                            | 33 (50.8)                            |                            |
| Male                                          | 188 (48.7)                            | 32 (49.2)                            |                            |
| <b>Child's Race</b>                           |                                       |                                      | 0.303                      |
| White                                         | 298 (77.2)                            | 51 (78.5)                            |                            |
| Black or African American                     | 26 (6.7)                              | 7 (10.8)                             |                            |
| Other/Unknown                                 | 62 (16.1)                             | 7 (10.8)                             |                            |
| <b>Child's Ethnicity - Hispanic or Latino</b> | 77 (19.9)                             | 17 (26.2)                            | 0.252                      |
| <b>Twin</b>                                   | 29 (7.5)                              | 7 (10.8)                             | 0.332                      |
| <b>Small for Gestational Age (SGA)</b>        | 24 (6.4)                              | 3 (5.7)                              | 1.000                      |
| Missing                                       | 9                                     | 12                                   |                            |
| <b>Major Congenital Malformations</b>         | 19 (4.9)                              | 1 (1.5)                              | 0.334                      |
| <b>Any Breastfeeding</b>                      | 307 (79.7)                            | 36 (65.5)                            | 0.023                      |
| Missing                                       | 1                                     | 10                                   |                            |
| <b>Periconceptional Folate Use</b>            | 324 (83.9)                            | 44 (67.7)                            | 0.003                      |
| <b>Periconceptional Folate Dose</b>           |                                       |                                      | 0.009                      |
| 0 mg                                          | 62 (16.3)                             | 21 (33.9)                            |                            |
| > 0 - 0.4 mg                                  | 38 (10.0)                             | 1 (1.6)                              |                            |
| > 0.4 - 1 mg                                  | 90 (23.6)                             | 13 (21.0)                            |                            |

|                                                                  | <b>Children Included,<br/>N = 386</b> | <b>Children Excluded,<br/>N = 65</b> |                            |
|------------------------------------------------------------------|---------------------------------------|--------------------------------------|----------------------------|
|                                                                  | <b>n (%)</b>                          | <b>n (%)</b>                         | <b>P-Value<sup>a</sup></b> |
| > 1 - 4 mg                                                       | 169 (44.4)                            | 25 (40.3)                            |                            |
| > 4 mg                                                           | 22 (5.8)                              | 2 (3.2)                              |                            |
| Missing                                                          | 5                                     | 3                                    |                            |
| <b>Pregnancy Planned/Welcomed</b>                                |                                       |                                      | 0.006                      |
| Planned                                                          | 276 (71.5)                            | 35 (53.8)                            |                            |
| Unplanned/Welcome                                                | 98 (25.4)                             | 29 (44.6)                            |                            |
| Unplanned/Unwelcome                                              | 12 (3.1)                              | 1 (1.5)                              |                            |
| <b>Major Depressive Episode During<br/>Pregnancy<sup>b</sup></b> | 13 (3.4)                              | 6 (9.2)                              | 0.042                      |
| <b>Mother's Education</b>                                        |                                       |                                      | 0.011                      |
| College Degree (Advanced)                                        | 112 (29.0)                            | 9 (13.8)                             |                            |
| College Degree (Not Advanced)                                    | 169 (43.8)                            | 29 (44.6)                            |                            |
| No College Degree                                                | 105 (27.2)                            | 27 (41.5)                            |                            |
| <b>Mother's Employment</b>                                       |                                       |                                      | <.001                      |
| Employed full-time                                               | 215 (55.7)                            | 30 (46.2)                            |                            |
| Employed part-time                                               | 62 (16.1)                             | 3 (4.6)                              |                            |
| Unemployed <sup>c</sup>                                          | 109 (28.2)                            | 32 (49.2)                            |                            |
| <b>Household Income</b>                                          |                                       |                                      | <.001                      |
| Subject desires not to answer                                    | 21 (5.4)                              | 12 (18.5)                            |                            |
| \$24,999 or less                                                 | 65 (16.8)                             | 13 (20.0)                            |                            |
| \$25,000-49,999                                                  | 40 (10.4)                             | 10 (15.4)                            |                            |
| \$50,000-74,999                                                  | 52 (13.5)                             | 11 (16.9)                            |                            |
| \$75,000-99,999                                                  | 70 (18.1)                             | 3 (4.6)                              |                            |
| \$100,000 and up                                                 | 138 (35.8)                            | 16 (24.6)                            |                            |
| <b>Smoking<sup>d</sup></b>                                       | 24 (6.2)                              | 5 (7.7)                              | 0.590                      |



|                                                                             | <b>Children Included,<br/>N = 386</b> | <b>Children Excluded,<br/>N = 65</b> |                            |
|-----------------------------------------------------------------------------|---------------------------------------|--------------------------------------|----------------------------|
|                                                                             | <b>n (%)</b>                          | <b>n (%)</b>                         | <b>P-Value<sup>a</sup></b> |
| <b>Alcohol Use<sup>d</sup></b>                                              | 102 (26.4)                            | 15 (23.1)                            | 0.648                      |
| <b>Illicit Substance Use<sup>d</sup></b>                                    | 13 (3.4)                              | 1 (1.6)                              | 0.703                      |
| Missing                                                                     | 2                                     | 1                                    |                            |
| <b>McMaster FAD Problematic Family<br/>Functioning at Child's 2YO Visit</b> | 65 (17.7)                             | 9 (39.1)                             | 0.023                      |
| Missing                                                                     | 18                                    | 42                                   |                            |
| <b>Lifetime History of Mood Disorder<sup>e</sup></b>                        | 60 (15.9)                             | 12 (22.6)                            | 0.238                      |
| Missing                                                                     | 8                                     | 12                                   |                            |
| <b>Lifetime History of Anxiety Disorder<sup>e</sup></b>                     | 59 (15.6)                             | 7 (13.2)                             | 0.839                      |
| Missing                                                                     | 8                                     | 12                                   |                            |

Notes: Missing not used in calculation of percentages or in p-values. FAD = Family Assessment Device

<sup>a</sup> P-Values from Fisher's Exact Test.

<sup>b</sup> Depression based on SCID Mood Module at any depression assessment during pregnancy.

<sup>c</sup> Unemployed includes stay at home parent without outside job, unemployed due to disability, full-time student and looking for work.

<sup>d</sup> Self-reported smoking, alcohol use, or illicit substance use (including marijuana) at any time during pregnancy.

<sup>e</sup> Diagnosis from SCID.

**eTable 27.** Demographic, Baseline Characteristics, and Risk Factors for Children Included vs Excluded From Primary Analysis 1, Continuous Variables, Children in Primary Analysis 1, N = 451

|                                     | Children Included,<br>N = 386 |                      |                      | Children Excluded,<br>N = 65 |                      |                      | P-Value <sup>a</sup> |
|-------------------------------------|-------------------------------|----------------------|----------------------|------------------------------|----------------------|----------------------|----------------------|
|                                     | N                             | Mean<br>(95% CI)     | Median<br>(Min, Max) | N                            | Mean<br>(95% CI)     | Median<br>(Min, Max) |                      |
| WGA at Birth                        | 386                           | 38.5 (38.3, 38.7)    | 39 [24, 43]          | 65                           | 38.2 (37.8, 38.7)    | 39 [31, 42]          | 0.388                |
| WGA at Enrollment                   | 386                           | 13.9 (13.4, 14.3)    | 14 [4, 29]           | 65                           | 15.7 (14.7, 16.7)    | 17 [6, 23]           | 0.003                |
| Birthweight (kg)                    | 379                           | 3.23 (3.17, 3.29)    | 3.3 [0.6, 5.0]       | 54                           | 3.13 (2.94, 3.32)    | 3.1 [1.2, 4.6]       | 0.255                |
| Mother's Age at Enrollment          | 386                           | 30.6 (30.1, 31.1)    | 31 [15, 46]          | 65                           | 29.6 (28.0, 31.1)    | 29 [17, 43]          | 0.136                |
| Mother's IQ                         | 386                           | 99.6 (98.3, 100.9)   | 101 [58, 131]        | 64                           | 95.9 (92.3, 99.4)    | 95 [58, 125]         | 0.034                |
| Father's IQ <sup>b</sup>            | 250                           | 104.1 (102.4, 105.8) | 104 [58, 139]        | 32                           | 101.2 (95.7, 106.6)  | 103 [63, 140]        | 0.253                |
| Maternal Relative's IQ <sup>b</sup> | 140                           | 101.3 (98.7, 103.8)  | 103 [51, 133]        | 13                           | 91.7 (83.7, 99.7)    | 95 [68, 115]         | 0.030                |
| BDI During Pregnancy <sup>c</sup>   | 386                           | 6.83 (6.29, 7.37)    | 5.5 [0.0, 38.7]      | 65                           | 8.38 (7.23, 9.54)    | 8.0 [0.0, 21.7]      | 0.001                |
| BAI During Pregnancy <sup>c</sup>   | 386                           | 6.09 (5.53, 6.65)    | 4.7 [0.0, 38.3]      | 65                           | 7.18 (5.88, 8.49)    | 5.7 [0.5, 23.0]      | 0.051                |
| PSS During Pregnancy <sup>c</sup>   | 386                           | 17.61 (16.91, 18.31) | 17.3 [2.7, 40.0]     | 65                           | 19.74 (18.08, 21.39) | 18.7 [7.0, 33.3]     | 0.022                |
| PSQI During Pregnancy <sup>bd</sup> | 351                           | 5.54 (5.23, 5.84)    | 5.0 [0.0, 15.5]      | 55                           | 6.24 (5.43, 7.05)    | 5.8 [0.7, 15.8]      | 0.100                |

|  | Children Included,<br>N = 386 |                  |                      | Children Excluded,<br>N = 65 |                  |                      |                      |
|--|-------------------------------|------------------|----------------------|------------------------------|------------------|----------------------|----------------------|
|  | N                             | Mean<br>(95% CI) | Median<br>(Min, Max) | N                            | Mean<br>(95% CI) | Median<br>(Min, Max) | P-Value <sup>a</sup> |

Note: WGA = weeks gestational age; BDI = Beck Depression Inventory; BAI = Beck Anxiety Inventory; PSS = Perceived Stress Scale; PSQI = Pittsburgh Sleep Quality Index.

<sup>a</sup> P-Values from T-Test (WGA at Birth, WGA at Enrollment, Birthweight, Age, IQ Scores, PSQI Scores) and Wilcoxon Rank-Sum Test (BDI, BAI, and PSS Scores).

<sup>b</sup> Father's IQ, Maternal Relative's IQ, and PSQI Scores not assessed for inclusion in imputation model due to extensive missing data.

<sup>c</sup> Average of all assessments completed during time period. Pregnancy: enrollment through day of delivery; Post-Birth: post-delivery through 2YO visit. Average scores during Post-Birth and Enrollment through 2YO visit excluded due to insufficient data in the Excluded population to calculate the average score during Post-Birth period.

<sup>d</sup> Weighted monthly average of PSQI assessments completed during time period. At most one PSQI score per day was used in the calculation. Pregnancy: Enrollment through the day before delivery; Average scores during Postpartum and Pregnancy+Postpartum excluded due to insufficient data in the Excluded population to calculate the average score during Postpartum period.

**eTable 28.** Outcomes for Children Included vs Excluded From Primary Analysis 1, All Children, N = 451

| ABAS-3 General Adaptive Composite Score | Children Included, N = 386 |                      |                   | Children Excluded, N = 65 |                     |                   |
|-----------------------------------------|----------------------------|----------------------|-------------------|---------------------------|---------------------|-------------------|
|                                         | N                          | Mean (95% CI)        | Median (Min, Max) | N                         | Mean (95% CI)       | Median (Min, Max) |
| Age 4.5                                 | 326                        | 101.1 (99.8, 102.4)  | 101 [49, 120]     | 1                         | 91.0 (NC)           | 91 [91, 91]       |
| Age 3                                   | 372                        | 106.7 (105.5, 108.0) | 108 [61, 120]     | 2                         | 106.5 (74.7, 138.3) | 107 [104, 109]    |

Note: Statistical test to compare groups not computed due to larger number of missing due to drop out in the Excluded population. NC = Not calculable.

**eTable 29.** Demographic, Baseline Characteristics, and Risk Factors for Children Included vs Excluded From Primary Analysis 2, Categorical Variables, Children of WWE on ASM in 3rd Trimester, N = 329

|                                               | <b>Children Included,<br/>N = 271</b> | <b>Children Excluded,<br/>N = 58</b> |                            |
|-----------------------------------------------|---------------------------------------|--------------------------------------|----------------------------|
|                                               | <b>n (%)</b>                          | <b>n (%)</b>                         | <b>P-Value<sup>a</sup></b> |
| <b>Child's Sex</b>                            |                                       |                                      | 0.469                      |
| Female                                        | 143 (52.8)                            | 27 (46.6)                            |                            |
| Male                                          | 128 (47.2)                            | 31 (53.4)                            |                            |
| <b>Child's Race</b>                           |                                       |                                      | 0.505                      |
| White                                         | 223 (82.3)                            | 45 (77.6)                            |                            |
| Black or African American                     | 11 (4.1)                              | 4 (6.9)                              |                            |
| Other/Unknown                                 | 37 (13.7)                             | 9 (15.5)                             |                            |
| <b>Child's Ethnicity - Hispanic or Latino</b> | 54 (19.9)                             | 13 (22.4)                            | 0.720                      |
| <b>Twin</b>                                   | 19 (7.0)                              | 9 (15.5)                             | 0.064                      |
| <b>Small for Gestational Age (SGA)</b>        | 15 (5.7)                              | 3 (6.3)                              | 0.745                      |
| Missing                                       | 6                                     | 10                                   |                            |
| <b>Major Congenital Malformations</b>         | 13 (4.8)                              | 3 (5.2)                              | 1.000                      |
| <b>Any Breastfeeding</b>                      | 208 (77.0)                            | 29 (55.8)                            | 0.003                      |
| Missing                                       | 1                                     | 6                                    |                            |
| <b>Periconceptual Folate Use</b>              | 239 (88.2)                            | 44 (75.9)                            | 0.021                      |
| <b>Periconceptual Folate Dose</b>             |                                       |                                      | 0.113                      |
| 0 mg                                          | 32 (11.9)                             | 14 (25.5)                            |                            |
| > 0 - 0.4 mg                                  | 19 (7.0)                              | 3 (5.5)                              |                            |
| > 0.4 - 1 mg                                  | 51 (18.9)                             | 7 (12.7)                             |                            |
| > 1 - 4 mg                                    | 146 (54.1)                            | 29 (52.7)                            |                            |
| > 4 mg                                        | 22 (8.1)                              | 2 (3.6)                              |                            |
| Missing                                       | 1                                     | 3                                    |                            |

|                                                              | <b>Children Included,<br/>N = 271</b> | <b>Children Excluded,<br/>N = 58</b> |                            |
|--------------------------------------------------------------|---------------------------------------|--------------------------------------|----------------------------|
|                                                              | <b>n (%)</b>                          | <b>n (%)</b>                         | <b>P-Value<sup>a</sup></b> |
| <b>Pregnancy Planned/Welcomed</b>                            |                                       |                                      | 0.001                      |
| Planned                                                      | 200 (73.8)                            | 29 (50.0)                            |                            |
| Unplanned/Welcomed                                           | 63 (23.2)                             | 27 (46.6)                            |                            |
| Unplanned/Unwelcomed                                         | 8 (3.0)                               | 2 (3.4)                              |                            |
| <b>Major Depressive Episode During Pregnancy<sup>b</sup></b> | 11 (4.1)                              | 4 (6.9)                              | 0.313                      |
| <b>Mother's Education</b>                                    |                                       |                                      | 0.008                      |
| College Degree (Advanced)                                    | 75 (27.7)                             | 7 (12.1)                             |                            |
| College Degree (Not Advanced)                                | 126 (46.5)                            | 26 (44.8)                            |                            |
| No College Degree                                            | 70 (25.8)                             | 25 (43.1)                            |                            |
| <b>Mother's Employment</b>                                   |                                       |                                      | <.001                      |
| Employed full-time                                           | 158 (58.3)                            | 19 (32.8)                            |                            |
| Employed part-time                                           | 41 (15.1)                             | 3 (5.2)                              |                            |
| Unemployed <sup>c</sup>                                      | 72 (26.6)                             | 36 (62.1)                            |                            |
| <b>Household Income</b>                                      |                                       |                                      | <.001                      |
| Subject desires not to answer                                | 11 (4.1)                              | 12 (20.7)                            |                            |
| \$24,999 or less                                             | 45 (16.6)                             | 13 (22.4)                            |                            |
| \$25,000-49,999                                              | 28 (10.3)                             | 5 (8.6)                              |                            |
| \$50,000-74,999                                              | 37 (13.7)                             | 10 (17.2)                            |                            |
| \$75,000-99,999                                              | 48 (17.7)                             | 6 (10.3)                             |                            |
| \$100,000 and up                                             | 102 (37.6)                            | 12 (20.7)                            |                            |
| <b>Smoking<sup>d</sup></b>                                   | 14 (5.2)                              | 9 (15.5)                             | 0.010                      |
| <b>Alcohol Use<sup>d</sup></b>                               | 64 (23.6)                             | 14 (24.1)                            | 1.000                      |
| <b>Illicit Substance Use<sup>d</sup></b>                     | 8 (3.0)                               | 2 (3.5)                              | 0.688                      |
| Missing                                                      | 1                                     | 1                                    |                            |

|                                                                         | <b>Children Included,<br/>N = 271</b> | <b>Children Excluded,<br/>N = 58</b> |                            |
|-------------------------------------------------------------------------|---------------------------------------|--------------------------------------|----------------------------|
|                                                                         | <b>n (%)</b>                          | <b>n (%)</b>                         | <b>P-Value<sup>a</sup></b> |
| <b>McMaster FAD Problematic Family Functioning at Child's 2YO Visit</b> | 48 (18.7)                             | 9 (28.1)                             | 0.238                      |
| Missing                                                                 | 14                                    | 26                                   |                            |
| <b>Lifetime History of Mood Disorder<sup>e</sup></b>                    | 41 (15.4)                             | 12 (25.5)                            | 0.093                      |
| Missing                                                                 | 4                                     | 11                                   |                            |
| <b>Lifetime History of Anxiety Disorder<sup>e</sup></b>                 | 39 (14.6)                             | 6 (12.8)                             | 1.000                      |
| Missing                                                                 | 4                                     | 11                                   |                            |
| <b>Seizure Type<sup>f</sup></b>                                         |                                       |                                      | 0.586                      |
| Focal                                                                   | 87 (32.1)                             | 20 (34.5)                            |                            |
| Generalized                                                             | 164 (60.5)                            | 32 (55.2)                            |                            |
| Unclassified/Mixed                                                      | 20 (7.4)                              | 6 (10.3)                             |                            |
| <b>5 or More Convulsions During Pregnancy</b>                           | 9 (3.3)                               | 8 (15.1)                             | 0.002                      |
| Missing                                                                 | 1                                     | 5                                    |                            |
| <b>Mother's 3rd Trimester ASM<sup>g</sup></b>                           |                                       |                                      |                            |
| Monotherapy                                                             | 219 (80.8)                            | 35 (60.3)                            | 0.002 <sup>h</sup>         |
| Lamotrigine                                                             | 98 (36.2)                             | 10 (17.2)                            | 0.005 <sup>i</sup>         |
| Levetiracetam                                                           | 77 (28.4)                             | 15 (25.9)                            |                            |
| Oxcarbazepine                                                           | 14 (5.2)                              | 2 (3.4)                              |                            |
| Carbamazepine                                                           | 10 (3.7)                              | 3 (5.2)                              |                            |
| Zonisamide                                                              | 10 (3.7)                              | 3 (5.2)                              |                            |
| Other                                                                   | 10 (3.7)                              | 2 (3.4)                              |                            |
| Polytherapy                                                             | 52 (19.2)                             | 23 (39.7)                            |                            |
| Lamotrigine + Levetiracetam                                             | 25 (9.2)                              | 9 (15.5)                             |                            |
| Other                                                                   | 27 (10.0)                             | 14 (24.1)                            |                            |

|  | <b>Children Included,<br/>N = 271</b> | <b>Children Excluded,<br/>N = 58</b> |                            |
|--|---------------------------------------|--------------------------------------|----------------------------|
|  | <b>n (%)</b>                          | <b>n (%)</b>                         | <b>P-Value<sup>a</sup></b> |

Notes: Missing not used in calculation of percentages or in p-values. FAD = Family Assessment Device

<sup>a</sup> P-Values from Fisher's Exact Test.

<sup>b</sup> Depression based on SCID Mood Module at any depression assessment during pregnancy.

<sup>c</sup> Unemployed includes stay at home parent without outside job, unemployed due to disability, full-time student and looking for work.

<sup>d</sup> Self-reported smoking, alcohol use, or illicit substance use (including marijuana) at any time during pregnancy.

<sup>e</sup> Diagnosis from SCID.

<sup>f</sup> Three children in the Included population had mothers who reported multiple seizure types, 2 reported generalized & focal seizures and 1 reported generalized & unclassified seizures.

<sup>g</sup> Mother's ASM regimen at time of blood draw for maximum observed ratio ASM concentration during 3rd trimester (includes day of delivery) or if missing ASM concentration then ASM regimen for maximum ratio DDD during 3rd trimester.

<sup>h</sup> Mother's ASM Group (Monotherapy, Polytherapy) by Included vs Excluded.

<sup>i</sup> Mother's ASM Category (Lamotrigine, Levetiracetam, Other Monotherapy, Lamotrigine + Levetiracetam, Other Polytherapy) by Included vs Excluded.



**eTable 30.** Demographic, Baseline Characteristics, and Risk Factors for Children Included vs Excluded From Primary Analysis 2, Continuous Variables, Children of WWE on ASM in 3rd Trimester, N = 329

|                                                                        | Children Included,<br>N = 271 |                      |                      | Children Excluded,<br>N = 58 |                      |                      | P-Value <sup>a</sup> |
|------------------------------------------------------------------------|-------------------------------|----------------------|----------------------|------------------------------|----------------------|----------------------|----------------------|
|                                                                        | N                             | Mean<br>(95% CI)     | Median<br>(Min, Max) | N                            | Mean<br>(95% CI)     | Median<br>(Min, Max) |                      |
| WGA at Birth                                                           | 271                           | 38.6 (38.4, 38.8)    | 39 [33, 42]          | 58                           | 37.6 (36.9, 38.3)    | 38 [29, 41]          | <.001                |
| WGA at Enrollment                                                      | 271                           | 13.4 (12.8, 13.9)    | 14 [4, 29]           | 58                           | 15.2 (14.0, 16.4)    | 17 [6, 23]           | 0.006                |
| Birthweight (kg)                                                       | 266                           | 3.27 (3.20, 3.33)    | 3.3 [1.7, 4.9]       | 48                           | 2.90 (2.68, 3.13)    | 3.1 [1.1, 4.3]       | <.001                |
| Mother's Age at Enrollment                                             | 271                           | 31.0 (30.4, 31.6)    | 31 [18, 46]          | 58                           | 29.1 (27.3, 30.8)    | 29 [17, 43]          | 0.009                |
| Mother's IQ                                                            | 271                           | 98.8 (97.3, 100.3)   | 100 [65, 124]        | 57                           | 93.1 (89.1, 97.1)    | 95 [58, 124]         | 0.002                |
| Father's IQ <sup>b</sup>                                               | 189                           | 104.6 (102.7, 106.6) | 105 [58, 139]        | 20                           | 99.2 (92.0, 106.3)   | 98 [63, 140]         | 0.094                |
| Maternal Relative's IQ <sup>b</sup>                                    | 100                           | 101.5 (98.4, 104.7)  | 104 [51, 133]        | 15                           | 90.4 (83.8, 97.0)    | 88 [68, 113]         | 0.011                |
| BDI During Pregnancy <sup>c</sup>                                      | 271                           | 6.91 (6.22, 7.60)    | 5.3 [0.0, 38.7]      | 58                           | 9.20 (7.96, 10.44)   | 8.2 [0.0, 21.7]      | <.001                |
| BAI During Pregnancy <sup>c</sup>                                      | 271                           | 6.18 (5.50, 6.86)    | 4.7 [0.0, 38.3]      | 58                           | 8.59 (6.93, 10.26)   | 6.8 [0.5, 23.0]      | 0.007                |
| PSS During Pregnancy <sup>c</sup>                                      | 271                           | 17.71 (16.84, 18.58) | 17.3 [2.7, 40.0]     | 58                           | 21.03 (19.28, 22.78) | 20.5 [7.0, 34.5]     | <.001                |
| PSQI During Pregnancy <sup>bd</sup>                                    | 248                           | 5.69 (5.31, 6.06)    | 5.1 [0.0, 15.5]      | 47                           | 6.63 (5.78, 7.49)    | 6.0 [3.0, 15.8]      | 0.048                |
| Convulsions During Pregnancy                                           | 270                           | 0.6 (0.3, 0.9)       | 0 [0, 28]            | 53                           | 2.7 (0.6, 4.8)       | 0 [0, 44]            | 0.075                |
| Max Observed Ratio ASM Concentration During 3rd Trimester <sup>e</sup> | 271                           | 0.52 (0.48, 0.56)    | 0.4 [0.0, 1.9]       | 32                           | 0.57 (0.45, 0.68)    | 0.5 [0.0, 1.6]       | 0.490                |

|                                                       | Children Included,<br>N = 271 |                   |                      | Children Excluded,<br>N = 58 |                   |                      | P-Value <sup>a</sup> |
|-------------------------------------------------------|-------------------------------|-------------------|----------------------|------------------------------|-------------------|----------------------|----------------------|
|                                                       | N                             | Mean<br>(95% CI)  | Median<br>(Min, Max) | N                            | Mean<br>(95% CI)  | Median<br>(Min, Max) |                      |
| Max Ratio DDD<br>During 3rd<br>Trimester <sup>f</sup> | 271                           | 2.21 (2.05, 2.38) | 2.0 [0.2, 8.3]       | 58                           | 2.71 (2.13, 3.30) | 2.0 [0.3, 10.7]      | 0.366                |

Note: WGA = weeks gestational age; BDI = Beck Depression Inventory; BAI = Beck Anxiety Inventory; PSS = Perceived Stress Scale; PSQI = Pittsburgh Sleep Quality Index.

<sup>a</sup> P-Values from T-Test (WGA at Birth, WGA at Enrollment, Birthweight, Age, IQ Scores, PSQI Scores) and Wilcoxon Rank-Sum Test (BDI, BAI, and PSS Scores, Convulsions, ratio DDD).

<sup>b</sup> Father's IQ, Maternal Relative's IQ, and PSQI Scores not assessed for inclusion in imputation model due to extensive missing data.

<sup>c</sup> Average of all assessments completed during time period. Pregnancy: enrollment through day of delivery; Post-Birth: post-delivery through 2YO visit. Average scores during Post-Birth and Enrollment through 2YO visit excluded due to insufficient data in the Excluded population to calculate the average score during Post-Birth period.

<sup>d</sup> Weighted monthly average of PSQI assessments completed during time period. At most one PSQI score per day was used in the calculation. Pregnancy: Enrollment through the day before delivery; Average scores during Postpartum and Pregnancy+Postpartum excluded due to insufficient data in the Excluded population to calculate the average score during Postpartum period.

<sup>e</sup> Ratio ASM Concentration calculated as ratio upper limit for therapeutic range. For mothers on polytherapy, ratio ASM concentration calculated by summing the ratio ASM concentration for each ASM. Maximum observed value recorded during 3rd trimester, including day of delivery.

<sup>f</sup> Ratio DDD = Ratio Defined Daily Dose, calculated by dividing the mother's ASM total prescribed daily dose by the WHO defined daily dose values. For mothers on polytherapy, ratio DDD equals the sum across the ratio DDD for all ASMs.

**eTable 31.** Outcomes for Children Included vs Excluded From Primary Analysis 2, Children of WWE on ASM in 3rd Trimester, N = 329

| ABAS-3 General Adaptive Composite Score | Children Included, N = 271 |                      |                   | Children Excluded, N = 58 |                     |                   |
|-----------------------------------------|----------------------------|----------------------|-------------------|---------------------------|---------------------|-------------------|
|                                         | N                          | Mean (95% CI)        | Median (Min, Max) | N                         | Mean (95% CI)       | Median (Min, Max) |
| Age 4.5                                 | 229                        | 101.2 (99.6, 102.8)  | 101 [49, 120]     | 11                        | 98.5 (90.9, 106.0)  | 96 [85, 118]      |
| Age 3                                   | 261                        | 106.6 (105.0, 108.1) | 108 [61, 120]     | 18                        | 102.6 (96.0, 109.2) | 100 [81, 120]     |

Note: Statistical test to compare groups not computed due to larger number of missing in the Excluded population.

**eTable 32.** Age 4.5 ABAS-3 General Adaptive Composite Score by Mother’s Study Group – Sensitivity Analysis, Children of WWE and WWoE

| Sensitivity Analysis/<br>Mother's Study<br>Group                            | Unadjusted Analysis <sup>a</sup> |                     |         | Adjusted Analysis <sup>b</sup> |                      |         |
|-----------------------------------------------------------------------------|----------------------------------|---------------------|---------|--------------------------------|----------------------|---------|
|                                                                             | N                                | Mean (95% CI)       | P-value | N                              | LS Mean (95% CI)     | P-value |
| <b>1. Completers Analysis<sup>c</sup></b>                                   |                                  |                     |         |                                |                      |         |
| WWE                                                                         | 253                              | 101.3 (99.8, 102.8) | 0.594   | 248                            | 101.3 (99.9, 102.6)  | 0.650   |
| WWoE                                                                        | 73                               | 100.4 (97.6, 103.3) |         | 73                             | 100.6 (98.0, 103.1)  |         |
| <b>2. All Subject Imputation Analysis<sup>d</sup></b>                       |                                  |                     |         |                                |                      |         |
| WWE                                                                         | 345                              | 100.9 (99.5, 102.4) | 0.860   | 345                            | 101.1 (99.7, 102.5)  | 0.878   |
| WWoE                                                                        | 106                              | 101.2 (98.5, 103.9) |         | 106                            | 100.8 (98.2, 103.5)  |         |
| <b>3. Birth-Related Covariates Excluded from Adjusted Model<sup>e</sup></b> |                                  |                     |         |                                |                      |         |
| WWE                                                                         | -                                | -                   | -       | 302                            | 101.5 (100.0, 102.9) | 0.720   |
| WWoE                                                                        | -                                | -                   |         | 84                             | 100.9 (98.3, 103.5)  |         |

Notes: N = children included in sensitivity analysis.

<sup>a</sup> Linear regression model.

<sup>b</sup> Linear regression model adjusted for mother's IQ, education level, age at enrollment, illicit drug-use during pregnancy, major depressive episode during pregnancy, post-birth average PSS score, and child's sex, birthweight, and small for gestational age status. Birthweight and small for gestational age status not included in adjusted model for sensitivity analysis 3.

<sup>c</sup> Children with non-missing age 4.5 ABAS-3 general adaptive composite scores.

<sup>d</sup> All children enrolled in study, missing age 4.5 ABAS-3 General Adaptive Composite Scores imputed using multiple imputation.

<sup>e</sup> Rerun of the primary analysis model excluding birth-related covariates: child's birthweight and small for gestational age status. Includes children with Age 4.5 ABAS-3 General Adaptive Composite Score or age 3 ABAS-3 General Adaptive Composite Score. Missing Age 4.5 ABAS-3 General Adaptive Composite Scores imputed using multiple imputation.

**eTable 33.** Association Between Age 4.5 ABAS-3 General Adaptive Composite Score and Maximum Observed Ratio ASM Concentration<sup>a</sup> During 3rd Trimester – Sensitivity Analysis, Children of WWE on ASM During the 3rd Trimester

| Sensitivity Analysis/<br>Outcome                                               | Unadjusted Analysis <sup>b</sup> |                                |         | Adjusted Analysis <sup>c</sup> |                                |         |
|--------------------------------------------------------------------------------|----------------------------------|--------------------------------|---------|--------------------------------|--------------------------------|---------|
|                                                                                | N                                | Parameter<br>Estimate (95% CI) | P-value | N                              | Parameter<br>Estimate (95% CI) | P-value |
| <b>1. Completers Analysis<sup>c</sup></b>                                      |                                  |                                |         |                                |                                |         |
| Mother's 3rd Trimester<br>Max Observed Ratio<br>ASM Concentration <sup>a</sup> | 229                              | -8.17 (-12.36, -<br>3.97)      | <.001   | 217                            | -9.46 (-14.31, -<br>4.62)      | <.001   |
| <b>2. All Subject Imputation Analysis<sup>d</sup></b>                          |                                  |                                |         |                                |                                |         |
| Mother's 3rd Trimester<br>Max Observed Ratio<br>ASM Concentration <sup>a</sup> | 329                              | -6.3 (-10.5, -2.1)             | 0.003   | 329                            | -6.4 (-11.4, -1.4)             | 0.012   |
| <b>3. Birth-Related Covariates Excluded from Adjusted Model<sup>e</sup></b>    |                                  |                                |         |                                |                                |         |
| Mother's 3rd Trimester<br>Max Observed Ratio<br>ASM Concentration <sup>a</sup> | -                                | -                              | -       | 271                            | -7.7 (-12.4, -2.9)             | 0.002   |

Notes: N = children included in sensitivity analysis.

<sup>a</sup> Ratio ASM Concentration calculated as ratio upper limit for therapeutic range. For mothers on polytherapy, ratio ASM concentration calculated by summing the ratio ASM concentration for each ASM. Maximum observed value recorded during 3rd trimester, including day of delivery.

<sup>b</sup> Linear regression model.

<sup>c</sup> Linear regression model adjusted for mother's IQ, education level, age at enrollment, ASM Group (monotherapy/polytherapy), smoking during pregnancy, post-birth average BAI score, McMaster FAD problematic family functioning at Child's 2YO Visit, and child's sex and small for gestational age status. Small for gestational age status not included in adjusted model for sensitivity analysis 3.

<sup>d</sup> Children with Age 4.5 ABAS-3 General Adaptive Composite Score and mother with 3rd trimester ASM blood levels.

<sup>d</sup> All children of WWE on ASM during the 3rd trimester enrolled in study, missing age 4.5 ABAS-3 General Adaptive Composite Scores imputed using multiple imputation.

<sup>e</sup> Rerun of the primary analysis model excluding birth-related covariates: child's small for gestational age status. Includes children with Age 4.5 ABAS-3 General Adaptive Composite Score or age 3 ABAS-3 General Adaptive Composite Score and mother with 3rd trimester ASM blood levels. Missing Age 4.5 ABAS-3 General Adaptive Composite Scores imputed using multiple imputation.

**eTable 34.** Summary of Age 4.5 ABAS-3 General Adaptive Composite Score by Mother’s Study Group and Pregnancy ASM Status, Children of WWE and WWoE, Completers Population, N = 326

| <b>Mother's Study Group and Pregnancy ASM Status</b> | <b>N</b> | <b>Mean (95% CI)</b> | <b>Median [Min, Max]</b> |
|------------------------------------------------------|----------|----------------------|--------------------------|
| WWE on ASM During Pregnancy                          | 240      | 101.1 (99.6, 102.6)  | 100.5 [49.0, 120.0]      |
| WWE Not on ASM During Pregnancy                      | 13       | 104.3 (97.0, 111.6)  | 106.0 [88.0, 120.0]      |
| WWoE                                                 | 73       | 100.4 (97.6, 103.3)  | 101.0 [52.0, 120.0]      |

Notes: N = children with non-missing age 4.5 ABAS-3 General Adaptive Composite score.

**eTable 35.** Age 4.5 ABAS-3 General Adaptive Composite Score by Mother's Study Group - Sensitivity Analysis Excluding Children of WWE Not on ASM During Pregnancy, Children of WWE on ASM During Pregnancy and WWoE, Completers Population, N = 313

|                             |     | Unadjusted Analysis <sup>a</sup> |         | Adjusted Analysis <sup>b</sup> |         |
|-----------------------------|-----|----------------------------------|---------|--------------------------------|---------|
| Mother's Study Group        | N   | Mean (95% CI)                    | P-value | LS Mean (95% CI)               | P-value |
| WWE on ASM During Pregnancy | 240 | 101.1 (99.6, 102.6)              | 0.668   | 101.2 (99.8, 102.6)            | 0.677   |
| WWoE                        | 73  | 100.4 (97.6, 103.3)              |         | 100.5 (98.0, 103.1)            |         |

Notes: N = children with non-missing age 4.5 ABAS-3 General Adaptive Composite scores, excluding children of WWE not on ASM during pregnancy.

<sup>a</sup> Mean and P-value from a linear regression model.

<sup>b</sup> Linear regression model adjusted for mother's IQ, education level, age at enrollment, illicit drug-use during pregnancy, major depressive episode during pregnancy, post-birth average PSS score, and child's sex, birthweight, and small for gestational age status.
