# Supplementary material
Source: PubMed Central journal article supplement (PMC10660252)
Supplement: jamaneurol-e234315-s002.pdf [file jamaneurol-e234315-s002.pdf]

\*First name, last name, and suffix (if applicable) are required and will appear in PubMed.

| <b>*Group Name(s): Maternal Outcomes and Neurodevelopmental Effects of Antiepileptic Drugs (MONEAD) Investigator Group</b> |                   |                              |                  |                                   |                                          |                                                         |                                                                                            |
|----------------------------------------------------------------------------------------------------------------------------|-------------------|------------------------------|------------------|-----------------------------------|------------------------------------------|---------------------------------------------------------|--------------------------------------------------------------------------------------------|
| <b>*First Name and Middle Initial(s)</b>                                                                                   | <b>*Last Name</b> | <b>*Suffix (eg, Jr, III)</b> | Academic Degrees | Institution                       | Location (city, state/province, country) | Role or Contribution, eg, chair, principal investigator | Group (if more than 1 Group listed in the byline and/or Subgroup (eg, Steering Committee)) |
| Maurice                                                                                                                    | Druzin            |                              | MD               | Stanford University               |                                          | Co-Director of OB Core                                  | Executive Committee                                                                        |
| Richard                                                                                                                    | Finnell           |                              | PhD              | Baylor College of Medicine        |                                          | Consultant on Teratog                                   | Executive Committee                                                                        |
| Gregory                                                                                                                    | Holmes            |                              | MD               | University of Vermont             |                                          | Consultant and Execut                                   | Executive Committee                                                                        |
| Frederick T.                                                                                                               | McElrath          |                              | MD               | Brigham & Women's Hospital        |                                          | Co-Director of OB Core                                  | Executive Committee                                                                        |
| Lorene                                                                                                                     | Nelson            |                              | PhD              | Stanford University               |                                          | Consultant and Execut                                   | Executive Committee                                                                        |
| Zachary                                                                                                                    | Stowe             |                              | MD               | University of Wisconsin           |                                          | Director of Psychiatric                                 | Executive Committee                                                                        |
| Linda                                                                                                                      | Van Marter        |                              | MD               | John Hopkins University           |                                          | Director of Neonatal C                                  | Executive Committee                                                                        |
| Peter                                                                                                                      | Wells             |                              | PharmD           | University of Toronto             |                                          | Consultant and Execut                                   | Executive Committee                                                                        |
| Mark                                                                                                                       | Yerby             |                              | MD               | Oregon Health Sciences University |                                          | Consultant and Execut                                   | Executive Committee                                                                        |
| Eugene                                                                                                                     | Moore             |                              | BS               | Emory University                  |                                          | Multisite Research Pro                                  | Executive Committee                                                                        |
| Ryan                                                                                                                       | May               |                              | PhD              | The Emmes Company                 |                                          | Former Multit PI                                        |                                                                                            |
| Dominic                                                                                                                    | Ippolito          |                              | MS               | The Emmes Company                 |                                          | Project Manager                                         |                                                                                            |
| Julia                                                                                                                      | Skinner           |                              | MS               | The Emmes Company                 |                                          | SAS Programmer                                          |                                                                                            |
| Lisa                                                                                                                       | Davis             |                              | BA               | The Emmes Company                 |                                          | Administrative Coordinator                              |                                                                                            |
| Nilay                                                                                                                      | Shah              |                              | MD               | The Emmes Company                 |                                          | Medical Monitor                                         |                                                                                            |
| Brenda                                                                                                                     | Leung             |                              | BS               | The Emmes Company                 |                                          | Programmer Analyst                                      |                                                                                            |
| Mark                                                                                                                       | Friedman          |                              | MS               | The Emmes Company                 |                                          | Clinical Systems Analyst                                |                                                                                            |
| Hayley                                                                                                                     | Loblein           |                              | PhD              | The Emmes Company                 |                                          | Data Manager/Protocol Monitor                           |                                                                                            |
| Traci                                                                                                                      | Sheer             |                              | BA               | The Emmes Company                 |                                          | Data Manager/Protocol Monitor                           |                                                                                            |
| Yue                                                                                                                        | Wang              |                              | MS               | The Emmes Company                 |                                          | SAS Programmer                                          |                                                                                            |
| Nancy                                                                                                                      | Browning          |                              | Ph.D.            | The Emmes Company                 |                                          | Former Project Pi                                       |                                                                                            |
| Michelle                                                                                                                   | Arias             |                              | B.A.             | The Emmes Company                 |                                          | Clinical Systems Analyst                                |                                                                                            |
| Rebecca                                                                                                                    | Ayre              |                              | B.S.             | The Emmes Company                 |                                          | Data Manager/Protocol Monitor                           |                                                                                            |
| Temperance                                                                                                                 | Blalock           |                              | A.A.             | The Emmes Company                 |                                          | Data Manager                                            |                                                                                            |
| Linda                                                                                                                      | Hendrickson       |                              |                  | The Emmes Company                 |                                          | Clinical Project Coordinator                            |                                                                                            |
| Merin                                                                                                                      | Mathew            |                              | M.Sc.            | The Emmes Company                 |                                          | SAS Programmer                                          |                                                                                            |
| Anjali                                                                                                                     | Nair              |                              | M.S.             | The Emmes Company                 |                                          | Data Manager/Protocol Monitor                           |                                                                                            |
| Yinka                                                                                                                      | Ogunsola          |                              | B.S.             | The Emmes Company                 |                                          | Systems Coordinator                                     |                                                                                            |
| Chinh                                                                                                                      | Ott               |                              | B.S.             | The Emmes Company                 |                                          | Systems Coordinator                                     |                                                                                            |

## Supplemental Online Content: Nonauthor Collaborators

\*First name, last name, and suffix (if applicable) are required and will appear in PubMed.

| *First Name and Middle Initial(s) | *Last Name   | *Suffix (eg, Jr, III) | Academic Degrees | Institution                                       | Location (city, state/province, country) | Role or Contribution, eg, chair, principal investigator | Group (if more than 1 Group listed in the byline) and/or Subgroup (eg, Steering Committee) |
|-----------------------------------|--------------|-----------------------|------------------|---------------------------------------------------|------------------------------------------|---------------------------------------------------------|--------------------------------------------------------------------------------------------|
| Phyllis                           | Zaia Renehan |                       | B.S.             | The Emmes Company                                 |                                          | Data Manager                                            |                                                                                            |
| Sarah                             | Romano       |                       | Mph              | The Emmes Company                                 |                                          | Data Manager/Protocol Monitor                           |                                                                                            |
| Dominic                           | Schutte      |                       | B.S.             | The Emmes Company                                 |                                          | Clinical Systems Analyst                                |                                                                                            |
| Noble                             | Shore        |                       | M.S.             | The Emmes Company                                 |                                          | Programmer/Analyst                                      |                                                                                            |
| Vydhi                             | Vasudevan    |                       | M.S.             | The Emmes Company                                 |                                          | Programmer/Analyst                                      |                                                                                            |
| Steffanie                         | Wilson       |                       | Ph.D.            | The Emmes Company                                 |                                          | Statistician                                            |                                                                                            |
| Jamie                             | Winestone    |                       | B.S.             | The Emmes Company                                 |                                          | Project Directo                                         |                                                                                            |
| Thad                              | Zajdowicz    |                       | M.D., Mph        | The Emmes Company                                 |                                          | Medical Monitor                                         |                                                                                            |
| Suzanne                           | Strickland   |                       | MD               | Augusta University                                |                                          | Site PI                                                 |                                                                                            |
| Erin                              | Latif        |                       | MD               | Augusta University                                |                                          | OB co-Investigator                                      |                                                                                            |
| Yong                              | Park         |                       | MD               | Augusta University                                |                                          | OB co-Investigator                                      |                                                                                            |
| Delmaris                          | Acosta-Cotte |                       | MA               | Augusta University                                |                                          | Site<br>Neuropsychologist                               |                                                                                            |
| Patty                             | Ray          |                       | PhD              | Augusta University                                |                                          | Research Assistant                                      |                                                                                            |
| Kirsten                           | Cleary       |                       | MD               | Columbia University                               |                                          | OB co-Investigator                                      |                                                                                            |
| Joyce                             | Echo         |                       | PhD              | Columbia University                               |                                          | Site<br>Neuropsychologist                               |                                                                                            |
| Annette                           | Zygmunt      |                       | PhD              | Columbia University                               |                                          | Site<br>Neuropsychologist                               |                                                                                            |
| Camilla                           | Casadei      |                       | BA               | Columbia University                               |                                          | Research Assistant                                      |                                                                                            |
| Ifemoa                            | Irobunda     |                       | BS               | Columbia University                               |                                          | Research Assistant                                      |                                                                                            |
| Anna                              | Chessky      |                       | BS               | Columbia University                               |                                          | Research Assistant                                      |                                                                                            |
| Mary                              | Dolan        |                       | MD               | Emory University                                  |                                          | OB co-Investigator                                      |                                                                                            |
| Kim                               | Ono          |                       | PhD              | Emory University Children's Healthcare of Atlanta |                                          | Site<br>Neuropsychologist                               |                                                                                            |
| Donald                            | Bearden      |                       | PhD              | Emory University Children's Healthcare of Atlanta |                                          | Site<br>Neuropsychologist                               |                                                                                            |
| Christine                         | Ghilian      |                       | PhD              | Emory University Children's Healthcare of Atlanta |                                          | Site<br>Neuropsychologist                               |                                                                                            |
| Diane                             | Teagarden    |                       | MSN              | Emory University                                  |                                          | Co-Investigator                                         |                                                                                            |
| Melanee                           | Newman       |                       | RN               | Emory University                                  |                                          | Research Assistant                                      |                                                                                            |

Supplemental Online Content: Nonauthor Collaborators

\*First name, last name, and suffix (if applicable) are required and will appear in PubMed.

| *First Name and Middle Initial(s) | *Last Name      | *Suffix (eg, Jr, III) | Academic Degrees | Institution                | Location (city, state/province, country) | Role or Contribution, eg, chair, principal investigator | Group (if more than 1 Group listed in the byline and/or Subgroup (eg, Steering Committee)) |
|-----------------------------------|-----------------|-----------------------|------------------|----------------------------|------------------------------------------|---------------------------------------------------------|--------------------------------------------------------------------------------------------|
| Yvan                              | Bamps           |                       | PhD              | Emory University           |                                          | Research Assistant                                      |                                                                                            |
| Emilee                            | Wehunt          |                       | BS               | Emory University           |                                          | Research Assistant                                      |                                                                                            |
| Paul                              | McCabe          |                       | MD               | Geisinger Clinic           |                                          | Retired Site PI                                         |                                                                                            |
| Michael                           | Paglia          |                       | MD               | Geisinger Clinic           |                                          | OB co-Investigator                                      |                                                                                            |
| Cora                              | Taylor          |                       | PhD              | Geisinger Clinic           |                                          | Site Neuropsychologist                                  |                                                                                            |
| Rosemarie                         | Delucca         |                       | RN               | Geisinger Clinic           |                                          | Research Assistant                                      |                                                                                            |
| Kristina                          | Blessing        |                       | MSW              | Geisinger Clinic           |                                          | Research Assistant                                      |                                                                                            |
| Joshua                            | Dopko           |                       | BS               | Geisinger Clinic           |                                          | Research Assistant                                      |                                                                                            |
| Katrina                           | Boyer           |                       | PhD              | Boston Children's Hospital |                                          | Site Neuropsychologist                                  |                                                                                            |
| Ellen                             | Hanson          |                       | PhD              | Boston Children's Hospital |                                          | Site Neuropsychologist                                  |                                                                                            |
| Amy                               | Young           |                       | PsyD             | Boston Children's Hospital |                                          | Site Neuropsychologist                                  |                                                                                            |
| Paige                             | Hickey          |                       | BS               | Boston Children's Hospital |                                          | Site Psychometrist                                      |                                                                                            |
| Jolie                             | Strauss         |                       | MA               | Boston Children's Hospital |                                          | Site Psychometrist                                      |                                                                                            |
| Hayley                            | Madeiros        |                       | BS               | Boston Children's Hospital |                                          | Site Psychometrist                                      |                                                                                            |
| Brian                             | Rozumny         |                       |                  | Boston Children's Hospital |                                          | Site Psychometrist                                      |                                                                                            |
| Li                                | Chen            |                       | BA               | Brigham & Women's Hospital |                                          | Research Assistant                                      |                                                                                            |
| Stephanie                         | Allien          |                       | PAC              | Brigham & Women's Hospital |                                          | Research Physician's Assistant                          |                                                                                            |
| Yvonne                            | Sheldon         |                       | RN               | Brigham & Women's Hospital |                                          | Neonatal Research Nurse                                 |                                                                                            |
| Taylor                            | Weinau          |                       | BS               | Brigham & Women's Hospital |                                          | OB Research Assistant                                   |                                                                                            |
| Elizabeth                         | Shashkova       |                       | BS               | Brigham & Women's Hospital |                                          | Research Assistant                                      |                                                                                            |
| Melanie                           | Choe            |                       | MS               | Brigham & Women's Hospital |                                          | Research Assistant                                      |                                                                                            |
| Gregory L.                        | Barkley         |                       | MD               | Henry Ford Hospital        |                                          | Site PI                                                 |                                                                                            |
| Marianna                          | Spanaki-Varelas |                       | MD               | Henry Ford Hospital        |                                          | OB Co-Investigator                                      |                                                                                            |
| Andrea                            | Thomas          |                       | MS               | Henry Ford Hospital        |                                          | Site Neuropsychologist                                  |                                                                                            |
| Jules                             | Constantinou    |                       | MD               | Henry Ford Hospital        |                                          | Co-Investigator                                         |                                                                                            |
| Nazin                             | Mahmood         |                       | MD               | Henry Ford Hospital        |                                          | Co-Investigator                                         |                                                                                            |
| Vibhangini                        | Wasade          |                       | MD               | Henry Ford Hospital        |                                          | Co-Investigator                                         |                                                                                            |
| Shailaja                          | Gaddam          |                       | MD               | Henry Ford Hospital        |                                          | Co-Investigator                                         |                                                                                            |
| Andrew                            | Zillgitt        |                       | DO               | Henry Ford Hospital        |                                          | Co-Investigator                                         |                                                                                            |
| Taimur                            | Anwar           |                       | MD               | Henry Ford Hospital        |                                          | OB Co-Investigator                                      |                                                                                            |

## Supplemental Online Content: Nonauthor Collaborators

\*First name, last name, and suffix (if applicable) are required and will appear in PubMed.

| *First Name and Middle Initial(s) | *Last Name  | *Suffix (eg, Jr, III) | Academic Degrees | Institution              | Location (city, state/province, country) | Role or Contribution, eg, chair, principal investigator | Group (if more than 1 Group listed in the byline and/or Subgroup (eg, Steering Committee)) |
|-----------------------------------|-------------|-----------------------|------------------|--------------------------|------------------------------------------|---------------------------------------------------------|--------------------------------------------------------------------------------------------|
| Carla                             | Sandles     |                       | CCRP             | Henry Ford Hospital      |                                          | Research Assistant                                      |                                                                                            |
| Theresa                           | Holmes      |                       | BA               | Henry Ford Hospital      |                                          | Research Assistant                                      |                                                                                            |
| Emily                             | Johnson     |                       | MD               | Johns Hopkins University |                                          | Site PI                                                 |                                                                                            |
| Gregory                           | Krauss      |                       | MD               | Johns Hopkins University | prior                                    | Site PI                                                 |                                                                                            |
| Shari                             | Lawson      |                       | MD               | Johns Hopkins University |                                          | OB Co-Investigator                                      |                                                                                            |
| Alison                            | Pritchard   |                       | PhD              | John Hopkins University  |                                          | Site Neuropsychologist                                  |                                                                                            |
| Matthew                           | Ryan        |                       | MS               | John Hopkins University  |                                          | Site Neuropsychologist                                  |                                                                                            |
| Pam                               | Coe         |                       | MS               | John Hopkins University  |                                          | Research Assistant                                      |                                                                                            |
| Katie                             | Reger       |                       | PhD              | Minnesota Epilepsy Group |                                          | Site Neuropsychologist                                  |                                                                                            |
| Jenny                             | Pohlman     |                       | MBS              | Minnesota Epilepsy Group |                                          | Research Assistant                                      |                                                                                            |
| Alisha                            | Olson       |                       | RN               | Minnesota Epilepsy Group |                                          | Research Assistant                                      |                                                                                            |
| Anna                              | Steele      |                       |                  | Minnesota Epilepsy Group |                                          | Site Neuropsychologist                                  |                                                                                            |
| Hadley                            | Lange       |                       |                  | Minnesota Epilepsy Group |                                          | Site Neuropsychologist                                  |                                                                                            |
| Patricia                          | Chang       |                       | MD               | Minnesota Epilepsy Group |                                          | OB co-Investigator                                      |                                                                                            |
| Sarah                             | Ellis       |                       | BS               | Minnesota Epilepsy Group |                                          | Research Assistant                                      |                                                                                            |
| William                           | Schweizer   |                       | MD               | New York University      |                                          | OB Co-Investigator                                      |                                                                                            |
| Chris                             | Morrison    |                       | PhD              | New York University      |                                          | Site Neuropsychologist                                  |                                                                                            |
| William                           | MacAllister |                       | PhD              | New York University      |                                          | Site Neuropsychologist                                  |                                                                                            |
| Tobi                              | Clements    |                       | BA               | New York University      |                                          | Research Assistant                                      |                                                                                            |
| Edward                            | Riley       |                       | PhD              | New York University      |                                          | Site Neuropsychologist                                  |                                                                                            |
| Aaron                             | Smith       |                       | RN               | New York University      |                                          | Research Assistant                                      |                                                                                            |
| Maria                             | Pleskovich  |                       | BS               | New York University      |                                          | Research Assistant                                      |                                                                                            |
| Hima Bindu Tam                    | Tam         |                       | MD               | Northwell Health         |                                          | OB Co-Investigator                                      |                                                                                            |
| Yael Cukier                       | Cukier      |                       | PhD              | Northwell Health         |                                          | Site Neuropsychologist                                  |                                                                                            |
| Erica Meltzer                     | Meltzer     |                       | MD               | Northwell Health         |                                          | Site Neuropsychologist                                  |                                                                                            |
| Jacqueline Helcer                 | Helcer      |                       | PhD              | Northwell Health         |                                          | Site Neuropsychologist                                  |                                                                                            |
| Connie Lau                        | Lau         |                       | MS               | Northwell Health         |                                          | Research Assistant                                      |                                                                                            |
| Scott                             | Baron       |                       | MS               | Northwell Health         |                                          | Research Assistant                                      |                                                                                            |
| Olivia                            | Colon       |                       | MSGH             | Northwell Health         |                                          | Research Assistant                                      |                                                                                            |
| William                           | Grobman     |                       | MD               | Northwestern University  |                                          | OB Co-Investigator                                      |                                                                                            |
| Joseph                            | Coda        |                       | PsyD             | Northwestern University  |                                          | Site Neuropsychologist                                  |                                                                                            |

## Supplemental Online Content: Nonauthor Collaborators

\*First name, last name, and suffix (if applicable) are required and will appear in PubMed.

| *First Name and Middle Initial(s) | *Last Name     | *Suffix (eg, Jr, III) | Academic Degrees | Institution                         | Location (city, state/province, country) | Role or Contribution, eg, chair, principal investigator | Group (if more than 1 Group listed in the byline and/or Subgroup (eg, Steering Committee)) |
|-----------------------------------|----------------|-----------------------|------------------|-------------------------------------|------------------------------------------|---------------------------------------------------------|--------------------------------------------------------------------------------------------|
| Emily                             | Miller         |                       | MD               | Northwestern University             |                                          | OB Co-Investigator                                      |                                                                                            |
| Irena                             | Bellinski      |                       | RN               | Northwestern University             |                                          | Research Assistant                                      |                                                                                            |
| Elizabeth                         | Bachman        |                       | MPH              | Northwestern University             |                                          | Research Assistant                                      |                                                                                            |
| Casey                             | Krueger        |                       | PhD              | Stanford Healthcare                 |                                          | Site Neuropsychologist                                  |                                                                                            |
| Jordan                            | Seliger        |                       | MA               | Stanford University                 |                                          | Research Assistant                                      |                                                                                            |
| Jennifer                          | DeWolfe        |                       | DO               | University of Alabama at Birmingham |                                          | Site PI                                                 |                                                                                            |
| John                              | Owen           |                       | MD               | University of Alabama at Birmingham |                                          | OB Co-Investigator                                      |                                                                                            |
| Matthew                           | Thompson       |                       | PsyD             | University of Alabama at Birmingham |                                          | Site Neuropsychologist                                  |                                                                                            |
| Cheryl                            | Hall           |                       | LPN              | University of Alabama at Birmingham |                                          | Research Assistant                                      |                                                                                            |
| Valencia                          | Williams       |                       | MSc              | University of Alabama at Birmingham |                                          | Research Assistant                                      |                                                                                            |
| Anna                              | Moyana         |                       | BS               | University of Alabama at Birmingham |                                          | Research Assistant                                      |                                                                                            |
| David                             | Labiner        |                       | MD               | Arizona Health Sciences Center      |                                          | Site PI                                                 |                                                                                            |
| James                             | Maciulla       |                       | MD               | University of Arizona               |                                          | OB Co-Investigator                                      |                                                                                            |
| Jennifer                          | Moon           |                       | PsyD             | University of Arizona               |                                          | Site Neuropsychologist                                  |                                                                                            |
| Kayla                             | Darris         |                       | BA               | University of Arizona               |                                          | Research Assistant                                      |                                                                                            |
| Alicia                            | Bahe           |                       | BS               | University of Arizona               |                                          | Research Assistant/Site Neuropsychologist               |                                                                                            |
| Scott                             | Richards       |                       |                  | University of Arizona               |                                          | Research Assistant                                      |                                                                                            |
| Michael                           | Privitera      |                       | MD               | University of Cincinnati            |                                          | Co-Investigator                                         |                                                                                            |
| Kellie                            | Flood-Schaffer |                       | MD               | University of Cincinnati            |                                          | OB Co-Investigator                                      |                                                                                            |
| George                            | Jewell         |                       | PhD              | University of Cincinnati            |                                          | Site Neuropsychologist                                  |                                                                                            |
| Lucy                              | Mendoza        |                       | CCRP             | University of Cincinnati            |                                          | Research Assistant                                      |                                                                                            |
| Becky                             | Mcelroy        |                       | BA               | University of Cincinnati            |                                          | Site Neuropsychologist                                  |                                                                                            |
| Enrique                           | Serrano        |                       | MD               | University of Miami                 |                                          | Site PI                                                 |                                                                                            |
| Yasin                             | Salih          |                       | MD               | University of Miami                 |                                          | OB Co-Investigator                                      |                                                                                            |
| Christin                          | Bermudez       |                       | PhD              | University of Miami                 |                                          | Site Neuropsychologist                                  |                                                                                            |
| Michelle                          | Miranda        |                       | PhD              | University of Miami                 |                                          | Site Neuropsychologist                                  |                                                                                            |
| Naymee                            | Velez-Ruiz     |                       | MD               | University of Miami                 |                                          | Co-Investigator                                         |                                                                                            |
| Pedro                             | Figueredo      |                       | MD               | University of Miami                 |                                          | Research Assistant                                      |                                                                                            |
| Danielle                          | Carns          |                       | PhD              | University of Miami                 |                                          | Site Neuropsychologist                                  |                                                                                            |
| Scott                             | Harcourt       |                       | PhD              | University of Miami                 |                                          | Site Neuropsychologist                                  |                                                                                            |
| Kristin                           | Ramirez        |                       | BS               | University of Miami                 |                                          | Research Assistant                                      |                                                                                            |

## Supplemental Online Content: Nonauthor Collaborators

\*First name, last name, and suffix (if applicable) are required and will appear in PubMed.

| *First Name and Middle Initial(s) | *Last Name     | *Suffix (eg, Jr, III) | Academic Degrees | Institution                            | Location (city, state/province, country) | Role or Contribution, eg, chair, principal investigator | Group (if more than 1 Group listed in the byline and/or Subgroup (eg, Steering Committee)) |
|-----------------------------------|----------------|-----------------------|------------------|----------------------------------------|------------------------------------------|---------------------------------------------------------|--------------------------------------------------------------------------------------------|
| Leticia                           | Tedesco Silva  |                       | MD PhD           | University of Miami                    |                                          | Research Assistant                                      |                                                                                            |
| Anto                              | Bagic          |                       | MD               | University of Pittsburgh               |                                          | Site PI                                                 |                                                                                            |
| Alexandra                         | Urban          |                       | MD               | University of Pittsburgh               |                                          | Co-Investigator                                         |                                                                                            |
| Satya                             | Gedela         |                       | MD               | University of Pittsburgh               |                                          | Co-Investigator                                         |                                                                                            |
| Christina                         | Patterson      |                       | MD               | University of Pittsburgh               |                                          | Co-Investigator                                         |                                                                                            |
| Arundhathi                        | Jeyabalan      |                       | MD               | University of Pittsburgh               |                                          | OB Co-Investigator                                      |                                                                                            |
| Krestin                           | Radonovich     |                       | PhD              | University of Pittsburgh               |                                          | Site Neuropsychologist                                  |                                                                                            |
| Melissa                           | Sutcliffe      |                       | PhD              | University of Pittsburgh               |                                          | Site Neuropsychologist                                  |                                                                                            |
| Susan                             | Beers          |                       | PhD              | University of Pittsburgh               |                                          | Site Neuropsychologist                                  |                                                                                            |
| Carrie                            | Wiles          |                       | MS               | University of Pittsburgh               |                                          | Site Neuropsychologist                                  |                                                                                            |
| Sabrina                           | Duran          |                       | BS               | University of Pittsburgh               |                                          | Research Assistant                                      |                                                                                            |
| Dane                              | Prince         |                       | MS               | University of Pittsburgh               |                                          | Research Assistant                                      |                                                                                            |
| Sandra                            | Alhaj          |                       | BS               | University of Pittsburgh               |                                          | Research Assistant                                      |                                                                                            |
| Alice                             | Stek           |                       | MD               | University of Southern California      |                                          | OB Co-Investigator                                      |                                                                                            |
| Sonia                             | Perez          |                       | PhD              | University of Southern California      |                                          | Site Neuropsychologist                                  |                                                                                            |
| Rachel                            | Sierra         |                       | RC               | University of Southern California      |                                          | Research Assistant                                      |                                                                                            |
| Cynthia                           | Munoz          |                       | MA               | University of Southern California      |                                          | Site Neuropsychologist                                  |                                                                                            |
| John W.                           | Miller         |                       | MD               | University of Washington               |                                          | Previous Site PI                                        |                                                                                            |
| Jennie                            | Mao            |                       | MD               | University of Washington               |                                          | OB Co-Investigator                                      |                                                                                            |
| Vaishali                          | Phatak         |                       | PhD              | University of Washington               |                                          | Site Neuropsychologist                                  |                                                                                            |
| Michelle                          | Kim            |                       | PhD              | University of Washington               |                                          | Site Neuropsychologist                                  |                                                                                            |
| Andrea                            | Cheng-Hakimian |                       | MD               | University of Washington               |                                          | Co-Investigator                                         |                                                                                            |
| Gina                              | DeNoble        |                       | MS               | University of Washington               |                                          | Research Assistant                                      |                                                                                            |
| Jeffrey                           | Tsai           |                       | MD               | University of Washington               |                                          | Site PI                                                 |                                                                                            |
| Erin                              | Anthony-Fick   |                       | BS               | University of Washington               |                                          | Research Assistant                                      |                                                                                            |
| Jennifer                          | Steele         |                       | BA               | University of Washington               |                                          | Research Assistant                                      |                                                                                            |
| Lamar                             | Parker         |                       | MD               | Wake Forest University Health Sciences |                                          | OB Co-Investigator                                      |                                                                                            |
| Melissa                           | Morris         |                       | MA               | Wake Forest University Health Sciences |                                          | Site Neuropsychologist                                  |                                                                                            |
| Jessica                           | Dimos          |                       | BS               | Wake Forest University Health Sciences |                                          | Research Assistant                                      |                                                                                            |
| Deanna                            | Oates          |                       | AAS              |                                        |                                          | Research Assistant                                      |                                                                                            |
| Danielle                          | Culbreth       |                       | MA               |                                        |                                          | Project Traveling Neuropsychologist                     |                                                                                            |
