# Supplementary material
Source: PubMed Central journal article supplement (PMC10660252)
Supplement: jamaneurol-e234315-s003.pdf [file jamaneurol-e234315-s003.pdf]

## Data Sharing Statement

Cohen. Behavioral Outcomes and Neurodevelopmental Disorders Among Children of Women With Epilepsy. *JAMA Neurol*. Published November 20, 2023.

doi:10.1001/jamaneurol.2023.4315

### Data

**Data available:** Yes

**Data types:** Deidentified participant data, Data dictionary

**How to access data:** Kimford J. Meador MD [kmeador@stanford.edu](mailto:kmeador@stanford.edu)

**When available:** With publication

### Supporting Documents

**Document types:** Statistical/analytic code, Informed consent form

**How to access documents:** Kimford J. Meador MD [kmeador@stanford.edu](mailto:kmeador@stanford.edu)

**When available:** With publication

### Additional Information

**Who can access the data:** Researchers whose proposed use of the data has been approved.

**Types of analyses:** Specified purpose approved by Kimford J. Meador, MD.

**Mechanisms of data availability:** With approval of a written proposal and with a signed data access agreement between the researcher/s and Kimford J. Meador, MD, Co-PI.

**Any additional restrictions:** After publication of the 6-year-old analyses.
